# Supplementary material for: Novel amide-functionalized chloramphenicol base bifunctional organocatalysts for enantioselective alcoholysis ofmeso-cyclic anhydrides
Source: publisher site journal article supplement (doi:10.3762/bjoc.14.19), 2018-01-31
Supplement: Additional file 1 [file 1860-5397-14-19-S1.pdf]

## Supporting Information

for

# Novel amide-functionalized chloramphenicol base bifunctional organocatalysts for enantioselective alcoholysis of *meso*-cyclic anhydrides

Lingjun Xu, Shuwen Han, Linjie Yan, Haifeng Wang, Haihui Peng\* and Fener Chen\*

Address: Department of Chemistry, Fudan University, Shanghai 200433, PR China.

Email: Haihui Peng - haihui\_peng@fudan.edu.cn; Fener Chen - rfchen@fudan.edu.cn

\*Corresponding author

## Detailed experimental procedures, <sup>1</sup>H NMR files

### Content

|                                                                                         |        |
|-----------------------------------------------------------------------------------------|--------|
| 1 General procedure.....                                                                | S2     |
| 2. Preparation of the chloramphenicol base amide bifunctional organocatalysts..         | S2–11  |
| 3. Typical procedure for alcoholysis of <i>meso</i> -cyclic anhydride.....              | S11    |
| 4. Scale-up methanolysis of <i>meso</i> -cyclic anhydride <b>8h</b> (4.26 g scale)..... | S11    |
| 5. Characterization of the monoesters.....                                              | S12–18 |
| 6. Catalytic asymmetric synthesis of ( <i>S</i> )-GABOB by <b>7i</b> .....              | S19–23 |
| 7. References.....                                                                      | S23    |
| 8. Copies of NMR spectra and chiral HPLC spectra.....                                   | S24–79 |

## 1. General procedure

Unless otherwise specified, all reagents and solvents were purchased from commercial sources and used as received.  $^1\text{H}$  (400 MHz) and  $^{13}\text{C}$  (100 MHz) NMR were recorded on a Bruker Avance 400 spectrometer in  $\text{CDCl}_3$  or  $d_6$ -DMSO using tetramethylsilane (TMS) as internal standards. Coupling constant ( $J$ ) values are given in Hz. Multiplicities are designated by the following abbreviations: s, singlet; d, doublet; t, triplet; q, quartet; br, broad; m, multiplet. Melting points were measured on WRS-1B digital melting-point apparatus. Products were purified by flash column chromatography on silica gel purchased from Qingdao Haiyang Chemical Co. Ltd. Optical rotations were measured by a Rudolph AUTOPOL I Automatic Polarimeter. EIMS were recorded on an Agilent 6890N/5975 spectrometer and ESI-MS were recorded on a Waters Micromass Quattro Micro spectrometer. HRMS were recorded on a Bruker micrOTOF spectrometer. HPLC analysis were performed with Daicel Chiralpak AD-H column ( $25\text{ cm} \times 4.6\text{ mm} \times 5\text{ }\mu\text{m}$ ), Chiralpak OD-H column ( $25\text{ cm} \times 4.6\text{ mm} \times 5\text{ }\mu\text{m}$ ) and Chiralpak IA-H column ( $25\text{ cm} \times 4.6\text{ mm} \times 5\text{ }\mu\text{m}$ ).

## 2. Preparation of the chloramphenicol base amide bifunctional organocatalysts

### General procedure

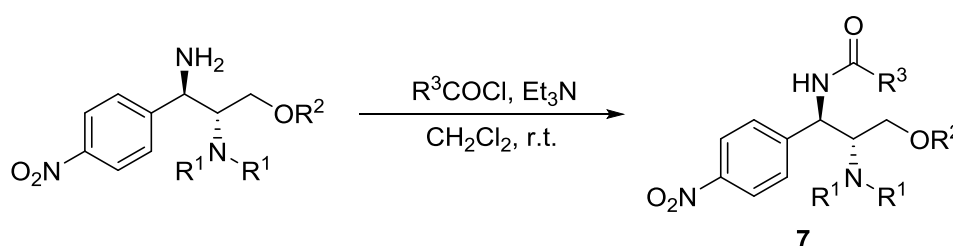

To a solution of chloramphenicol base (1 g, 2 mmol) and in  $\text{CH}_2\text{Cl}_2$  (20 mL) was added the solution of  $\text{Et}_3\text{N}$  (1.15 mL, 8 mmol) in  $\text{CH}_2\text{Cl}_2$  (10 mL) under  $\text{N}_2$  atmosphere. After cooling to  $0\text{ }^\circ\text{C}$ ,  $\text{R}^3\text{COCl}$  (3 mmol) was added dropwise over 20 min. After addition, the reaction mixture was stirred for 3 h at room temperature and then quenched by water (10 mL). The organic phase was washed with  $\text{NaHCO}_3$  (20 mL),  $\text{H}_2\text{O}$  (20 mL), brine (20 mL), dried over  $\text{Na}_2\text{SO}_4$  and concentrated under reduced

pressure to give a yellow solid. The crude product was purified by flash chromatography using PE/EA 10:1 to give product **7**.

***N*-((1*R*,2*R*)-2-(Dimethylamino)-1-(4-nitrophenyl)-3-(trityloxy)propyl)-4-(trifluoromethyl)benzamide (**7a**)**

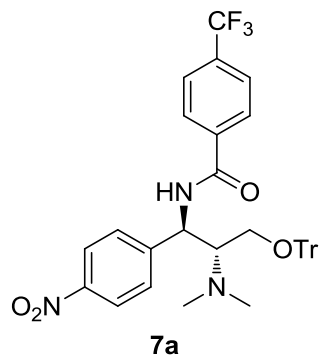

Yellow solid, yield 80%;  $^1\text{H}$  NMR (400 MHz,  $\text{CDCl}_3$ )  $\delta$  = 8.20 (s, 1H), 8.06 (d,  $J$  = 8.6 Hz, 2H), 7.90 (d,  $J$  = 8.1 Hz, 2H), 7.72 (d,  $J$  = 8.2 Hz, 2H), 7.37 (d,  $J$  = 8.5 Hz, 2H), 7.28-7.23 (m, 15H), 4.69 (d,  $J$  = 10.3 Hz, 1H), 3.30-3.22 (m, 2H), 3.01-2.97 (m, 1H), 2.46 (s, 6H) ppm;  $^{13}\text{C}$  NMR (100 MHz,  $\text{CDCl}_3$ )  $\delta$  = 165.9, 148.8, 147.0, 143.0, 137.1, 133.2, 128.5, 128.2, 127.7, 127.4, 127.1, 125.6, 125.6, 123.6, 87.6, 67.7, 58.17, 54.1, 41.4 ppm; HRMS (ESI $^+$ ) calcd for  $\text{C}_{38}\text{H}_{34}\text{F}_3\text{N}_3\text{O}_4$   $[\text{M}+\text{H}]^+$  = 654.2580, found: 654.2574.

***N*-((1*R*,2*R*)-2-(Dimethylamino)-1-(4-nitrophenyl)-3-(trityloxy)propyl)-4-nitrobenzamide (**7b**)**

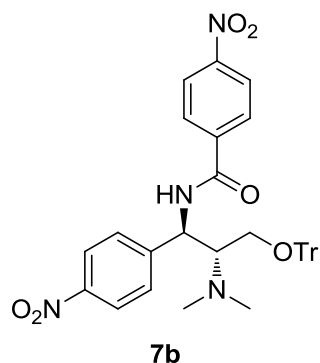

Yellow solid, yield 73%;  $^1\text{H}$  NMR (400 MHz,  $\text{CDCl}_3$ )  $\delta$  = 8.30 (d,  $J$  = 8.7 Hz, 2H), 8.26 (s, 1H), 8.07 (d,  $J$  = 8.6 Hz, 2H), 7.94 (d,  $J$  = 8.7 Hz, 2H), 7.37 (d,  $J$  = 8.6 Hz, 2H), 7.26-7.23 (m, 15H), 4.69 (dd,  $J$  = 10.2, 1.9 Hz, 1H), 3.31-3.22 (m, 2H), 3.01-2.96 (m, 1H), 2.47 (s, 6H) ppm;  $^{13}\text{C}$  NMR (100 MHz,  $\text{CDCl}_3$ )  $\delta$  = 165.2, 149.7,

148.5, 147.0, 143.0, 139.4, 128.5, 128.2, 128.1, 127.7, 127.2, 123.8, 123.7, 87.6, 67.6, 58.1, 54.2, 41.4 ppm; HRMS (ESI<sup>+</sup>) calcd for C<sub>37</sub>H<sub>34</sub>N<sub>4</sub>O<sub>6</sub> [M+H]<sup>+</sup> = 631.2557, found: 631.2568.

***N*-((1*R*,2*R*)-2-(Dimethylamino)-1-(4-nitrophenyl)-3-(trityloxy)propyl)-4-fluorobenzamide (7c)**

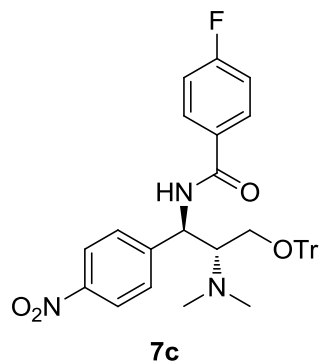

Yellow solid, yield 85%; <sup>1</sup>H NMR (400 MHz, CDCl<sub>3</sub>) δ = 8.12 (s, 1H), 8.06 (d, *J* = 8.6 Hz, 2H), 7.82-7.78 (m, 2H), 7.38 (d, *J* = 8.6 Hz, 2H), 7.25 (m, 15H), 7.11 (t, *J* = 8.6 Hz, 2H), 4.70 (d, *J* = 10.3 Hz, 1H), 3.29-3.22 (m, 2H), 3.02-2.99 (m, 1H), 2.46 (s, 6H) ppm; <sup>13</sup>C NMR (100 MHz, CDCl<sub>3</sub>) δ = 166.2, 149.1, 146.9, 143.0, 129.4, 129.3, 128.5, 128.3, 127.7, 127.1, 123.6, 115.7, 115.4, 87.6, 67.6, 58.1, 53.9, 41.3 ppm; HRMS (ESI<sup>+</sup>) calcd for C<sub>37</sub>H<sub>34</sub>FN<sub>3</sub>O<sub>4</sub> [M+H]<sup>+</sup> = 604.2612, found: 604.2625.

***N*-((1*R*,2*R*)-2-(dimethylamino)-1-(4-nitrophenyl)-3-(trityloxy)propyl)-4-chlorobenzamide (7d)**

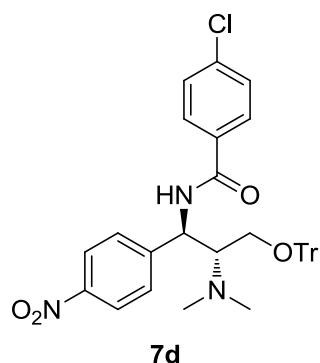

Yellow solid, yield 80%; <sup>1</sup>H NMR (400 MHz, CDCl<sub>3</sub>) δ = 8.13 (s, 1H), 8.06 (d, *J* = 8.6 Hz, 2H), 7.73 (d, *J* = 8.5 Hz, 2H), 7.42 (d, *J* = 8.6 Hz, 2H), 7.37 (d, *J* = 8.6 Hz, 2H), 7.28-7.23 (m, 15H), 4.69 (d, *J* = 8.7 Hz, 1H), 3.29-3.21 (m, 2H), 3.02-2.97 (m, 1H), 2.46 (s, 6H) ppm; <sup>13</sup>C NMR (100 MHz, CDCl<sub>3</sub>) δ = 166.2, 149.0, 146.9, 143.0, 137.9, 132.2, 128.8, 128.5, 128.4, 129.2, 127.7, 127.1, 123.6, 87.6, 67.6, 58.1, 54.0,

41.3 ppm; HRMS (ESI<sup>+</sup>) calcd for C<sub>37</sub>H<sub>34</sub>ClN<sub>3</sub>O<sub>4</sub> [M+H]<sup>+</sup> = 620.2316, found: 620.2305.

**4-Bromo-*N*-((1*R*,2*R*)-2-(dimethylamino)-1-(4-nitrophenyl)-3-(trityloxy)propyl)-benzamide (7e)**

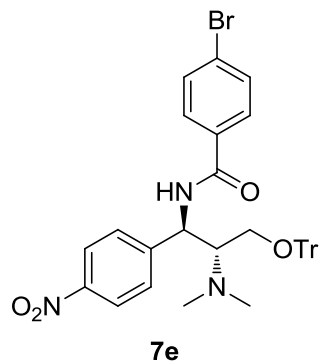

Yellow solid, yield 88%; <sup>1</sup>H NMR (400 MHz, CDCl<sub>3</sub>) δ = 8.09 (s, 1H), 8.05 (d, *J* = 8.6 Hz, 2H), 7.66 (d, *J* = 8.4 Hz, 2H), 7.58 (d, *J* = 8.4 Hz, 2H), 7.36 (d, *J* = 8.5 Hz, 2H), 7.27-7.23 (m, 15H), 4.66 (d, *J* = 10.1 Hz, 1H), 3.29-3.20 (m, 2H), 2.99-2.95 (m, 1H), 2.45 (s, 6H) ppm; <sup>13</sup>C NMR (100 MHz, CDCl<sub>3</sub>) δ = 166.3, 149.0, 146.9, 143.0, 132.7, 131.8, 128.6, 128.5, 128.2, 127.7, 127.1, 126.4, 123.6, 87.6, 67.7, 58.1, 54.0, 41.4 ppm; HRMS (ESI<sup>+</sup>) calcd for C<sub>37</sub>H<sub>34</sub>BrN<sub>3</sub>O<sub>4</sub> [M+H]<sup>+</sup> = 664.1811, found: 664.1809.

***N*-((1*R*,2*R*)-2-(Dimethylamino)-1-(4-nitrophenyl)-3-(trityloxy)propyl)benzamide (7f)**

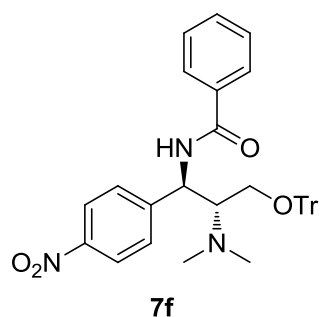

Yellow solid, yield 75%; <sup>1</sup>H NMR (400 MHz, CDCl<sub>3</sub>) δ = 8.15 (s, 1H), 8.06 (d, *J* = 8.6 Hz, 2H), 7.80 (d, *J* = 7.3 Hz, 2H), 7.52 (d, *J* = 7.4 Hz, 1H), 7.46 (t, *J* = 7.6 Hz, 2H), 7.39 (d, *J* = 8.7 Hz, 2H), 7.27-7.23 (m, 15H), 4.72 (dd, *J* = 10.4, 2.3 Hz, 1H), 3.30-3.21 (m, 2H), 3.03-2.99 (m, 1H), 2.47 (s, 6H) ppm; <sup>13</sup>C NMR (100 MHz, CDCl<sub>3</sub>) δ = 167.2, 149.3, 146.8, 143.1, 133.9, 131.6, 128.5, 128.3, 127.7, 127.1, 127.0, 123.6,

87.5, 67.7, 58.2, 53.9, 41.3 ppm; HRMS (ESI<sup>+</sup>) calcd for C<sub>37</sub>H<sub>35</sub>N<sub>3</sub>O<sub>4</sub> [M+H]<sup>+</sup> = 586.2706, found: 586.2705.

***N*-((1*R*,2*R*)-2-(Dimethylamino)-1-(4-nitrophenyl)-3-(trityloxy)propyl)-4-methylbenzamide (7g)**

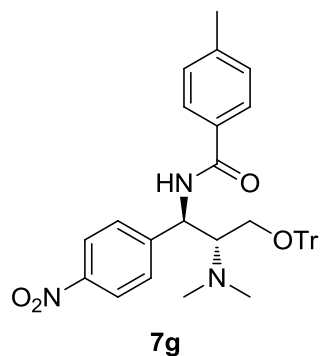

Yellow solid, yield 77%; <sup>1</sup>H NMR (400 MHz, CDCl<sub>3</sub>) δ = 8.12 (s, 1H), 8.05 (d, *J* = 8.5 Hz, 2H), 7.70 (d, *J* = 8.0 Hz, 2H), 7.39 (d, *J* = 8.6 Hz, 2H), 7.27-7.23 (m, 17H), 4.72 (d, *J* = 10.4 Hz, 1H), 3.28 – 3.21 (m, 2H), 3.03 – 3.01 (m, 1H), 2.46 (s, 6H), 2.41 (s, 3H) ppm; <sup>13</sup>C NMR (100 MHz, CDCl<sub>3</sub>) δ = 167.3, 149.4, 146.8, 143.1, 142.1, 131.0, 129.2, 128.5, 128.3, 127.7, 127.1, 127.0, 123.6, 87.5, 67.6, 58.2, 53.8, 41.3, 21.4 ppm; HRMS (ESI<sup>+</sup>) calcd for C<sub>38</sub>H<sub>37</sub>N<sub>3</sub>O<sub>4</sub> [M+H]<sup>+</sup> = 600.2862, found: 600.2859.

***N*-((1*R*,2*R*)-2-(Dimethylamino)-1-(4-nitrophenyl)-3-(trityloxy)propyl)-4-methoxybenzamide (7h)**

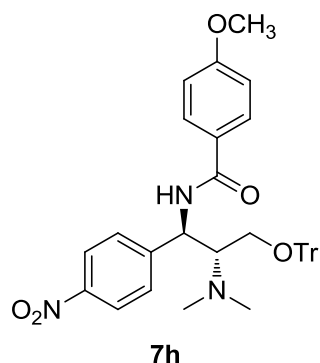

Yellow solid, yield 68%; <sup>1</sup>H NMR (400 MHz, CDCl<sub>3</sub>) δ = 8.02 (d, *J* = 8.6 Hz, 2H), 7.98 (s, 1H), 7.74 (d, *J* = 8.6 Hz, 2H), 7.35 (d, *J* = 8.5 Hz, 2H), 7.24-7.21 (m, 15H), 6.92 (d, *J* = 8.6 Hz, 2H), 4.65 (d, *J* = 10.3 Hz, 1H), 3.84 (s, 3H), 3.26-3.18 (m, 2H), 2.96-2.93 (m, 1H), 2.43 (s, 6H) ppm; <sup>13</sup>C NMR (100 MHz, CDCl<sub>3</sub>) δ = 167.1, 162.4, 148.7, 147.1, 142.9, 129.0, 128.7, 128.6, 127.9, 127.3, 126.1, 123.8, 113.7, 87.7, 66.7,

57.9, 55.3, 53.3, 41.0 ppm; HRMS (ESI<sup>+</sup>) calcd for C<sub>38</sub>H<sub>37</sub>N<sub>3</sub>O<sub>5</sub> [M+H]<sup>+</sup> = 616.2811, found: 616.2804.

***N*-((1*R*,2*R*)-2-(Dimethylamino)-1-(4-nitrophenyl)-3-(trityloxy)propyl)-3,5-bis-(trifluoromethyl)benzamide (7i)**

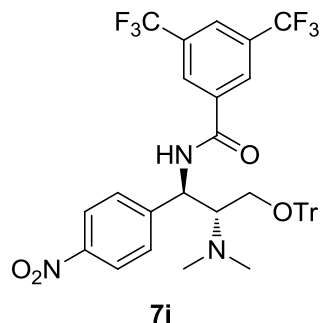

White solid, yield 90%; <sup>1</sup>H NMR (400 MHz, CDCl<sub>3</sub>) δ = 8.26 (br, 1H), 8.20 (s, 2H), 8.06 (d, *J* = 8.6 Hz, 2H), 8.02 (s, 1H), 7.38 (d, *J* = 8.6 Hz, 2H), 7.24-7.23 (m, 15H), 4.70 (d, *J* = 10.7 Hz, 1H), 3.30-3.22 (m, 2H), 3.04-3.03 (m, 1H), 2.47 (s, 6H) ppm; <sup>13</sup>C NMR (100 MHz, CDCl<sub>3</sub>) δ = 164.5, 148.3, 147.1, 143.0, 136.0, 132.4, 132.0, 128.5, 128.3, 127.7, 127.2, 127.2, 123.7, 87.6, 67.6, 60.3, 54.2, 41.3 ppm; HRMS (ESI<sup>+</sup>) calcd for C<sub>39</sub>H<sub>33</sub>F<sub>6</sub>N<sub>3</sub>O<sub>4</sub> [M+H]<sup>+</sup> = 722.2454, found: 722.2455.

***N*-((1*R*,2*R*)-1-(4-Nitrophenyl)-2-(pyrrolidin-1-yl)-3-(trityloxy)propyl)-3,5-bis-(trifluoromethyl)benzamide (7j)**

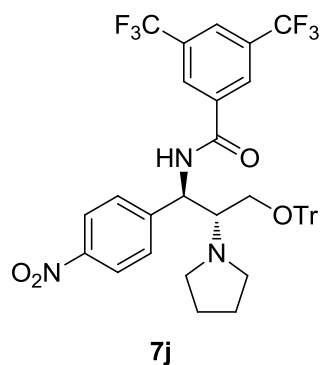

Light yellow solid, yield 92%; <sup>1</sup>H NMR (400 MHz, CDCl<sub>3</sub>) δ = 8.37 (br, 1H), 8.16 (s, 2H), 8.08 (d, *J* = 8.4 Hz, 2H), 7.99 (s, 1H), 7.41 (d, *J* = 8.3 Hz, 2H), 7.21-7.19 (m, 15H), 5.05 (d, *J* = 5.5 Hz, 1H), 3.36-3.33 (m, 1H), 3.26-3.20 (m, 2H), 2.64 (d, *J* = 28.8 Hz, 4H), 1.73-1.69 (m, 4H) ppm; <sup>13</sup>C NMR (100 MHz, CDCl<sub>3</sub>) δ = 164.4, 148.6, 147.2, 143.2, 136.4, 132.5, 132.2, 128.6, 128.1, 128.0, 127.4, 124.3, 123.8, 121.6,

87.8, 65.1, 60.1, 54.6, 49.7, 23.7 ppm; HRMS (ESI<sup>+</sup>) calcd for C<sub>41</sub>H<sub>35</sub>F<sub>6</sub>N<sub>3</sub>O<sub>4</sub> [M+H]<sup>+</sup> = 748.2610, found: 748.2592.

***N*-((1*R*,2*R*)-1-(4-Nitrophenyl)-2-(piperidin-1-yl)-3-(trityloxy)propyl)-3,5-bis(trifluoromethyl)benzamide (7k)**

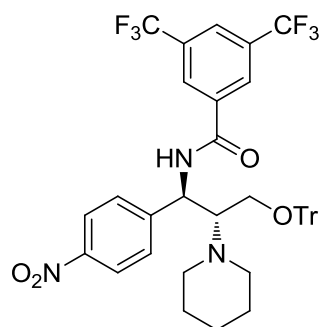

**7k**

Light yellow solid, yield 89%; <sup>1</sup>H NMR (400 MHz, CDCl<sub>3</sub>) δ = 8.72 (s, 1H), 8.29 (s, 2H), 8.07-8.02 (m, 3H), 7.36 (d, *J* = 8.2 Hz, 2H), 7.25-7.21 (m, 15H), 4.60 (d, *J* = 10.4 Hz, 1H), 3.34-3.30 (m, 1H), 3.24 (d, *J* = 10.3 Hz, 1H), 2.94 (s, 1H), 2.80-2.76 (m, 2H), 2.60 (s, 2H), 1.63 (s, 2H), 1.51 (s, 4H) ppm; <sup>13</sup>C NMR (100 MHz, CDCl<sub>3</sub>) δ = 163.8, 148.7, 147.2, 143.2, 136.0, 132.6, 132.4, 128.7, 128.5, 127.9, 127.3, 125.2, 124.5, 123.9, 87.8, 69.1, 58.8, 53.6, 27.4, 27.0, 24.5 ppm; HRMS (ESI<sup>+</sup>) calcd for C<sub>42</sub>H<sub>37</sub>F<sub>6</sub>N<sub>3</sub>O<sub>4</sub> [M+H]<sup>+</sup> = 762.2767, found: 762.2731.

***N*-((1*R*,2*R*)-2-Morpholino-1-(4-nitrophenyl)-3-(trityloxy)propyl)-3,5-bis(trifluoromethyl)benzamide (7l)**

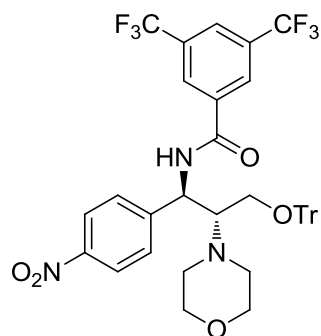

**7l**

Yellow solid, yield 82%; <sup>1</sup>H NMR (400 MHz, CDCl<sub>3</sub>) δ = 8.38 (s, 1H), 8.26 (s, 2H), 8.07 (s, 1H), 8.04 (s, 2H), 7.35 (d, *J* = 8.4 Hz, 2H), 7.25-7.21 (m, 15H), 4.70 (d, *J* = 10.4 Hz, 1H), 3.76-3.73 (m, 2H), 3.73-3.68 (m, 2H), 3.35-3.31 (m, 1H), 3.28-3.26 (m,



1H), 3.00-2.98 (m, 1H), 2.85 (m, 2H), 2.72-2.71 (m, 2H) ppm;  $^{13}\text{C}$  NMR (100 MHz,  $\text{CDCl}_3$ )  $\delta$  = 163.8, 148.1, 147.3, 143.1, 135.8, 132.4, 128.6, 128.4, 127.9, 127.4, 127.2, 124.3, 123.9, 88.0, 68.4, 68.0, 58.9, 53.3, 27.0 ppm; HRMS ( $\text{ESI}^+$ ) calcd for  $\text{C}_{41}\text{H}_{35}\text{F}_6\text{N}_3\text{O}_5$   $[\text{M}+\text{Na}]^+ = 786.2379$ , found: 786.2349.

***N*-((1*R*,2*R*)-3-((*tert*-Butyldimethylsilyl)oxy)-2-(dimethylamino)-1-(4-nitrophenyl)-propyl)-3,5-bis(trifluoromethyl)benzamide (7m)**

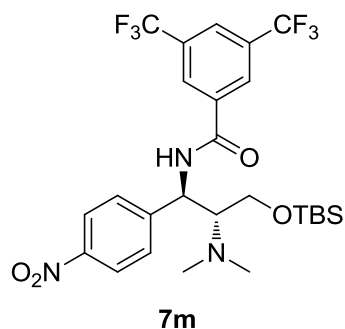

White solid, yield 88%;  $^1\text{H}$  NMR (400 MHz,  $\text{CDCl}_3$ )  $\delta$  = 8.23-8.20 (m, 4H), 8.00 (s, 1H), 7.64 (d,  $J$  = 8.3 Hz, 2H), 5.10 (d,  $J$  = 9.5 Hz, 1H), 3.83 (d,  $J$  = 11.4 Hz, 1H), 3.37 (dd,  $J$  = 11.4, 4.1 Hz, 1H), 2.51 (s, 6H), 1.26 (s, 1H), 0.91 (s, 9H), 0.01 (s, 6H) ppm;  $^{13}\text{C}$  NMR (100 MHz,  $\text{CDCl}_3$ )  $\delta$  = 164.8, 147.5, 136.3, 132.5, 132.2, 128.6, 127.5, 125.3, 123.9, 121.6, 68.2, 56.7, 52.9, 41.8, 25.9, 18.2, -5.5 ppm; HRMS ( $\text{ESI}^+$ ) calcd for  $\text{C}_{26}\text{H}_{33}\text{F}_6\text{N}_3\text{O}_4\text{Si}$   $[\text{M}+\text{H}]^+ = 594.2223$ , found: 594.2209.

***N*-((1*R*,2*R*)-3-((*tert*-Butyldimethylsilyl)oxy)-1-(4-nitrophenyl)-2-(pyrrolidin-1-yl)-propyl)-3,5-bis(trifluoromethyl)benzamide (7n)**

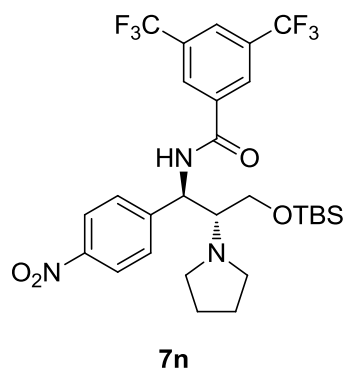

Yellow solid, yield 85%;  $^1\text{H}$  NMR (400 MHz,  $\text{CDCl}_3$ )  $\delta$  = 8.39 (s, 1H), 8.24 (s, 2H), 8.20 (d,  $J$  = 8.1 Hz, 2H), 8.03 (s, 1H), 7.60 (d,  $J$  = 8.0 Hz, 2H), 5.29 (s, 1H), 3.71-3.63 (m, 2H), 3.04 (s, 1H), 2.80 (s, 2H), 2.68 (s, 2H), 1.83-1.77 (m, 4H), 0.88 (s, 9H), 0.01 (s, 6H) ppm;  $^{13}\text{C}$  NMR (100 MHz,  $\text{CDCl}_3$ )  $\delta$  = 164.1, 148.5, 147.2, 136.3, 132.4,

132.1, 127.9, 127.3, 123.6, 121.5, 66.5, 59.8, 53.5, 50.2, 25.8, 23.5, 18.1, -5.6 ppm;  
HRMS (ESI<sup>+</sup>) calcd for C<sub>28</sub>H<sub>35</sub>F<sub>6</sub>N<sub>3</sub>O<sub>4</sub>Si [M+H]<sup>+</sup> = 620.2379, found: 620.2377.

***N*-((1*R*,2*R*)-3-((*tert*-Butyldimethylsilyl)oxy)-1-(4-nitrophenyl)-2-(piperidin-1-yl)-propyl)-3,5-bis(trifluoromethyl)benzamide (7o)**

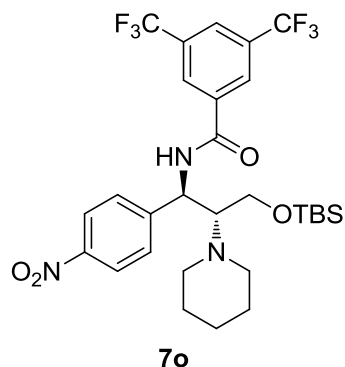

Light yellow solid, yield 83%; <sup>1</sup>H NMR (400 MHz, CDCl<sub>3</sub>) δ = 8.68 (s, 1H), 8.31 (s, 2H), 8.20 (d, *J* = 8.1 Hz, 2H), 8.03 (s, 1H), 7.60 (d, *J* = 8.1 Hz, 2H), 4.94 (d, *J* = 10.3 Hz, 1H), 3.79 (d, *J* = 11.2 Hz, 1H), 3.42 (dd, *J* = 11.2, 4.3 Hz, 1H), 2.86-2.81 (m, 2H), 2.74 (d, *J* = 8.8 Hz, 1H), 2.62 (s, 2H), 1.66 (s, 2H), 1.54 (s, 4H), 0.90 (s, 9H), 0.01 (s, 6H) ppm; <sup>13</sup>C NMR (100 MHz, CDCl<sub>3</sub>) δ = 164.0, 149.0, 147.4, 136.1, 132.6, 132.2, 128.4, 127.3, 125.3, 123.9, 121.7, 70.0, 57.3, 52.2, 27.5, 25.9, 24.6, 18.1, -5.5 ppm; HRMS (ESI<sup>+</sup>) calcd for C<sub>29</sub>H<sub>37</sub>F<sub>6</sub>N<sub>3</sub>O<sub>4</sub>Si [M+H]<sup>+</sup> = 634.2536, found: 634.2521.

***N*-((1*R*,2*R*)-3-((*tert*-Butyldimethylsilyl)oxy)-2-morpholino-1-(4-nitrophenyl)-propyl)-3,5-bis(trifluoromethyl)benzamide (7p)**

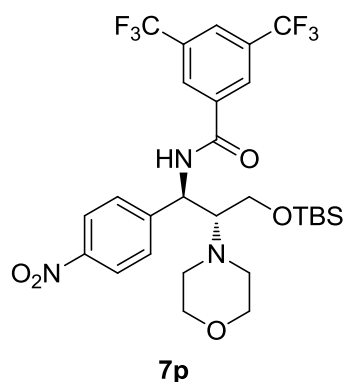

Light yellow solid, yield 80%; <sup>1</sup>H NMR (400 MHz, CDCl<sub>3</sub>) δ = 8.35 (s, 1H), 8.28 (s, 2H), 8.21 (d, *J* = 8.0 Hz, 2H), 8.04 (s, 1H), 7.61 (d, *J* = 8.1 Hz, 2H), 5.07 (d, *J* = 10.2 Hz, 1H), 3.84 (d, *J* = 11.4 Hz, 1H), 3.76 (d, *J* = 6.0 Hz, 2H), 3.68 (s, 2H), 3.41-3.38 (m, 1H), 2.87 (s, 2H), 2.79 (d, *J* = 10.1 Hz, 1H), 2.74-2.70 (m, 2H), 0.91 (s, 9H), 0.02

(s, 6H) ppm;  $^{13}\text{C}$  NMR (100 MHz,  $\text{CDCl}_3$ )  $\delta$  = 164.1, 148.3, 147.5, 136.0, 132.7, 132.3, 128.5, 127.2, 123.9, 121.6, 69.2, 68.0, 57.2, 52.0, 50.4, 25.9, 18.1, -5.5 ppm; HRMS (ESI<sup>+</sup>) calcd for  $\text{C}_{28}\text{H}_{35}\text{F}_6\text{N}_3\text{O}_5\text{Si}$   $[\text{M}+\text{Na}]^+$  = 658.2148, found: 658.2124.

### 3. Typical procedure for alcoholysis of *meso*-cyclic anhydride

An alcohol (5 mmol) was added dropwise at room temperature under nitrogen to a stirred solution of an anhydride **8** (0.5 mmol) and **7i** (36.1 mg, 0.05 mmol) in MTBE (20 mL). The reaction was monitored by using thin-layer chromatography. Once anhydride consumption was complete, the solvent was evaporated under reduced pressure and the residue was dissolved in  $\text{CH}_2\text{Cl}_2$  (10 mL). The solution was washed with saturated  $\text{Na}_2\text{CO}_3$  (2  $\times$  5 mL) and the combined aqueous phase were acidified with excess 2 N HCl, followed by extraction with EtOAc (3  $\times$  10 mL). The combined organic phases were dried over  $\text{Na}_2\text{SO}_4$  and concentrated to afford the corresponding monoester, without further purification by flash chromatography.

### 4. Scale-up methanolysis of *meso*-cyclic anhydride **8h** (4.26 g scale)

MeOH (10.1 mL, 250 mmol) was added dropwise at 0 °C under nitrogen to a stirred solution of *meso*-cyclic anhydride **8h** (4.26 g, 25 mmol) and **7i** (1.80 g, 2.5 mmol) in MTBE (2 L). The reaction was monitored by using thin-layer chromatography. After 96 h, the anhydride consumption was complete. The solvent was evaporated under reduced pressure and the residue was dissolved in  $\text{CH}_2\text{Cl}_2$  (300 mL). The solution was washed with saturated  $\text{Na}_2\text{CO}_3$  (3  $\times$  150 mL) and the combined aqueous layers were acidified with excess 2 N HCl, followed by extraction with EtOAc (3  $\times$  300 mL). The combined organic layers were dried over  $\text{Na}_2\text{SO}_4$  and concentrated to afford the corresponding monoester **9h**, without further purification by flash chromatography. Monoester **9h**, light yellow oil, yield 97%, 81% ee;  $[\alpha]_{\text{D}}^{25}$  = -3.5 ( $c$  = 1.0 in  $\text{CHCl}_3$ ); Chiral HPLC (Chiralcel AD-H column), Hexane/*i*-PrOH = 95/5, Flow rate: 0.6 mL/min, UV detection at 220 nm, T = 30 °C, retention time:  $t(\text{minor})$  = 50.6 min,  $t(\text{major})$  = 56.1 min.

## 5. Characterization of the monoesters

All monoesters except **9h** are known compounds and their NMR spectra data were identical to those reported in the literature.<sup>[2-7]</sup> The enantiomeric excess of the monoester was determined by chiral HPLC, analysis of the diastereoisomeric mixture of the corresponding amide ester derived from (*S*)-1-phenylethylamine according to the reported procedure.<sup>[2]</sup>

Thionyl chloride (0.6 mmol, 45  $\mu$ L) was added to a solution of the monoester (0.5 mmol) in dry toluene (10 mL) at 0  $^{\circ}$ C. The mixture was stirred at 0  $^{\circ}$ C for 30 minutes, and triethylamine (1.5 mmol, 0.14 mL) and (*S*)-1-phenylethylamine (0.55 mmol, 71  $\mu$ L) were added successively. The mixture was stirred at 0  $^{\circ}$ C for 1 h and at room temperature for an additional 1 h. The residue was then dissolved in ethyl acetate (50 mL). The organic solution was washed with HCl (2 N, 50 mL), saturated aq NaHCO<sub>3</sub> (50 mL), water (50 mL) and brine (50 mL). The organic phase was dried over Na<sub>2</sub>SO<sub>4</sub> and concentrated in vacuo to give the diastereoisomeric mixture. The enantiomeric excess was determined by comparison of chiral HPLC.

### (1*S*,6*R*)-6-(Methoxycarbonyl)cyclohex-3-enecarboxylic acid (**9a**)

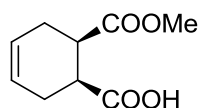

**9a**

White solid, yield 98%, 95% *ee*;  $[\alpha]_{\text{D}}^{25} = -4.3$  ( $c = 1.0$  in CHCl<sub>3</sub>) (lit.<sup>[2]</sup>  $[\alpha]_{\text{D}}^{20} = -4.9$  ( $c = 1.5$  in CHCl<sub>3</sub>)); Chiral HPLC (Chiralcel OD-H column), Hexane/*i*-PrOH = 93/7, Flow rate: 0.5 mL/min, UV detection at 220 nm, T = 30 $^{\circ}$ C, retention time: t(major) = 33.1 min, t(minor) = 45.3 min; <sup>1</sup>H NMR (400 MHz, CDCl<sub>3</sub>)  $\delta = 4.93$  (dd,  $J = 24.1, 3.6$  Hz, 2H), 3.67 (s, 3H), 3.05-2.99 (m, 2H), 1.84-1.82 (m, 2H), 1.56-1.51 (m, 2H) ppm; <sup>13</sup>C NMR (100 MHz, CDCl<sub>3</sub>)  $\delta = 179.7, 173.7, 125.1, 125.0, 51.9, 39.6, 39.4, 25.7, 25.5$  ppm.

### (1*S*,2*R*)-2-(Methoxycarbonyl)cyclohexanecarboxylic acid (**9b**)

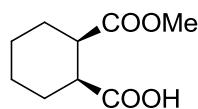

**9b**

Colorless oil, yield 97%, 90% *ee*;  $[\alpha]_D^{25} = +3.6$  ( $c = 1.0$  in  $\text{CHCl}_3$ ) (lit.<sup>[2]</sup>  $[\alpha]_D^{20} = +3.5$  ( $c = 1.43$  in  $\text{CHCl}_3$ )); Chiral HPLC (Chiralcel AD-H column), Hexane/*i*-PrOH = 93/7, Flow rate: 0.5 mL/min, UV detection at 220 nm,  $T = 30^\circ\text{C}$ , retention time:  $t(\text{minor}) = 23.2$  min,  $t(\text{major}) = 29.9$  min;  $^1\text{H}$  NMR (400MHz, DMSO):  $\delta = 3.67$  (s, 3H), 2.84 (s, 2H), 2.00 (br, 2H), 1.78 (br, 2H), 1.54-1.47 (m, 2H), 1.42-1.39 (m, 2H) ppm;  $^{13}\text{C}$  NMR (100 MHz, DMSO)  $\delta = 180.2, 174.2, 51.8, 42.6, 42.4, 26.3, 26.0, 23.8, 23.7$  ppm.

**(1S,2R,3S,4R)-3-(Methoxycarbonyl)-7-oxabicyclo[2.2.1]hept-5-ene-2-carboxylic acid (9c)**

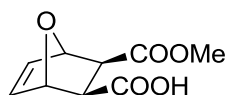

**9c**

White solid, yield 94%, 73% *ee*;  $[\alpha]_D^{25} = +6.3$  ( $c = 1.0$  in  $\text{CHCl}_3$ ) (lit.<sup>[2]</sup>  $[\alpha]_D^{20} = +8.7$  ( $c = 1.08$  in  $\text{CHCl}_3$ )); Chiral HPLC (Chiralcel OD-H column), Hexane/*i*-PrOH = 85/15, Flow rate: 0.5 mL/min, UV detection at 220 nm,  $T = 30^\circ\text{C}$ , retention time:  $t(\text{major}) = 23.8$  min,  $t(\text{minor}) = 37.8$  min;  $^1\text{H}$  NMR (400 MHz,  $\text{CDCl}_3$ )  $\delta = 7.69$  (br, 1H), 6.49-6.45 (m, 2H), 5.29 (d,  $J = 16.7$  Hz, 2H), 3.71 (s, 3H), 2.88-2.83 (m, 2H) ppm;  $^{13}\text{C}$  NMR (100 MHz, DMSO)  $\delta = 173.0, 172.5, 137.1, 137.0, 80.4, 80.1, 51.9, 47.0, 46.3$  ppm.

**(1R,2S,3R,4S)-3-(Methoxycarbonyl)bicyclo[2.2.1]hept-5-ene-2-carboxylic acid (9d)**

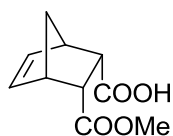

**9d**

White solid, yield 95%, 84% *ee*;  $[\alpha]_D^{25} = -5.8$  ( $c = 1.0$  in  $\text{CHCl}_3$ ) (lit.<sup>[2]</sup>  $[\alpha]_D^{20} = -7.4$  ( $c = 1.53$  in  $\text{CHCl}_3$ )); Chiral HPLC (Chiralcel AD-H column), Hexane/*i*-PrOH = 96/4, Flow rate: 0.5 mL/min, UV detection at 220 nm,  $T = 30^\circ\text{C}$ , retention time:  $t(\text{minor})$

= 47.8 min, t(major) = 50.7 min;  $^1\text{H}$  NMR (400 MHz,  $\text{CDCl}_3$ )  $\delta$  = 6.31 (dd,  $J$  = 5.1, 2.9 Hz, 1H), 6.22 (dd,  $J$  = 5.3, 2.8 Hz, 1H), 3.59 (s, 3H), 3.35-3.26 (m, 2H), 3.18 (d,  $J$  = 12.9 Hz, 2H), 1.49 (d,  $J$  = 8.6 Hz, 1H), 1.34 (d,  $J$  = 8.6 Hz, 1H) ppm;  $^{13}\text{C}$  NMR (100 MHz,  $\text{CDCl}_3$ )  $\delta$  = 178.3, 172.9, 135.5, 134.3, 51.5, 48.7, 48.2, 48.0, 46.5, 46.1 ppm.

**(R)-5-Methoxy-3-methyl-5-oxopentanoic acid (9e)**

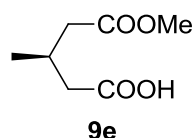

Yellow oil, yield 87%, 81% *ee*;  $[\alpha]_{\text{D}}^{25}$  = +3.1 ( $c$  = 1.0 in  $\text{CHCl}_3$ ) (lit.<sup>[21]</sup>  $[\alpha]_{\text{D}}^{20}$  = +1.1 ( $c$  = 1.36 in  $\text{CHCl}_3$ )); Chiral HPLC (Chiralcel AD-H column), Hexane/*i*-PrOH = 96/4, Flow rate: 0.5 mL/min, UV detection at 220 nm,  $T$  = 30°C, retention time: t(minor) = 38.3 min, t(major) = 44.1 min;  $^1\text{H}$  NMR (400 MHz,  $\text{CDCl}_3$ )  $\delta$  = 3.67 (s, 3H), 2.50-2.39 (m, 3H), 2.31-2.24 (m, 2H), 1.05 (d,  $J$  = 6.3 Hz, 3H) ppm;  $^{13}\text{C}$  NMR (100 MHz, DMSO)  $\delta$  = 173.8, 172.8, 51.6, 40.6, 40.3, 27.3, 19.8 ppm.

**(R)-3-Ethyl-5-methoxy-5-oxopentanoic acid (9f)**

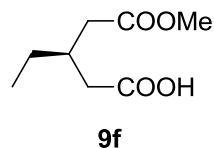

Yellow oil, yield 91%, 80% *ee*;  $[\alpha]_{\text{D}}^{25}$  = -1.36 ( $c$  = 1.0 in  $\text{CHCl}_3$ ) (lit.<sup>[81]</sup>  $[\alpha]_{\text{D}}^{20}$  = -0.92 ( $c$  = 1.0 in  $\text{CHCl}_3$ )); Chiral HPLC (Chiralcel AD-H column), Hexane/*i*-PrOH = 94/6, Flow rate: 0.5 mL/min, UV detection at 220 nm,  $T$  = 30°C, retention time: t(minor) = 26.7 min, t(major) = 30.3 min;  $^1\text{H}$  NMR (400 MHz,  $\text{CDCl}_3$ )  $\delta$  = 3.67 (s, 3H), 2.39 (t,  $J$  = 7.3 Hz, 4H), 2.31-2.24 (m, 1H), 1.42 (p,  $J$  = 7.3 Hz, 2H), 0.92 (t,  $J$  = 7.4 Hz, 3H) ppm;  $^{13}\text{C}$  NMR (100 MHz, DMSO)  $\delta$  = 174.0, 173.0, 51.6, 38.1, 37.8, 33.4, 26.4, 11.1 ppm.

**(R)-3-Isopropyl-5-methoxy-5-oxopentanoic acid (9g)**

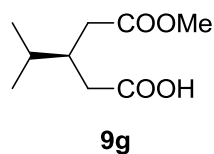

Yellow oil, yield 90%, 94% *ee*;  $[\alpha]_{\text{D}}^{25} = -2.7$  ( $c = 1.0$  in  $\text{CHCl}_3$ ); Chiral HPLC (Chiralcel IA-H column), Hexane/*i*-PrOH = 94/6, Flow rate: 0.5 mL/min, UV detection at 220 nm,  $T = 30^\circ\text{C}$ , retention time:  $t(\text{minor}) = 24.4$  min,  $t(\text{major}) = 31.0$  min;  $^1\text{H}$  NMR (400 MHz,  $\text{CDCl}_3$ )  $\delta = 10.97$  (br, 1H), 2.44 (d,  $J = 12.4$  Hz, 3H), 2.37-2.30 (m, 2H), 1.67-1.60 (m, 1H), 1.23 (t,  $J = 6.6$  Hz, 2H), 0.91 (d,  $J = 6.4$  Hz, 6H) ppm;  $^{13}\text{C}$  NMR (100 MHz,  $\text{CDCl}_3$ )  $\delta = 179.4, 178.1, 43.9, 38.9, 29.8, 25.1, 22.4, 20.8$  ppm.

**(*R*)-3-(Allyloxy)-5-methoxy-5-oxopentanoic acid (9h)**

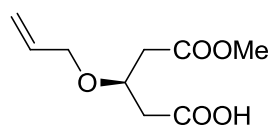

**9h**

Light yellow oil, yield 97%, 81% *ee*;  $[\alpha]_{\text{D}}^{25} = -3.5$  ( $c = 1.0$  in  $\text{CHCl}_3$ ); Chiral HPLC (Chiralcel AD-H column), Hexane/*i*-PrOH = 95/5, Flow rate: 0.6 mL/min, UV detection at 220 nm,  $T = 30^\circ\text{C}$ , retention time:  $t(\text{minor}) = 50.4$  min,  $t(\text{major}) = 58.8$  min;  $^1\text{H}$  NMR (400 MHz,  $\text{CDCl}_3$ )  $\delta = 5.91$ -5.82 (m, 1H), 5.25 (dd,  $J = 17.2, 1.2$  Hz, 1H), 5.16 (d,  $J = 10.4$  Hz, 1H), 4.21 (p,  $J = 6.2$  Hz, 1H), 4.06 (d,  $J = 5.7$  Hz, 2H), 3.69 (s, 3H), 2.68-2.57 (m, 4H) ppm;  $^{13}\text{C}$  NMR (100 MHz,  $\text{CDCl}_3$ )  $\delta = 176.6, 171.3, 134.2, 117.2, 71.9, 70.9, 51.7, 39.2, 39.1$  ppm.

**(*R*)-5-Methoxy-5-oxo-3-phenylpentanoic acid (9i)**

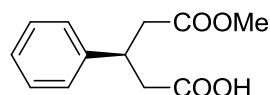

**9i**

White solid, yield 89%, 77% *ee*;  $[\alpha]_{\text{D}}^{25} = +7.5$  ( $c = 1.0$  in  $\text{CHCl}_3$ ) (lit.  $^{[2]}[\alpha]_{\text{D}}^{20} = +8.1$  ( $c = 1.62$  in  $\text{CHCl}_3$ )); Chiral HPLC (Chiralcel AD-H column), Hexane/*i*-PrOH = 90/10, Flow rate: 0.5 mL/min, UV detection at 220 nm,  $T = 30^\circ\text{C}$ , retention time:  $t(\text{minor}) = 43.2$  min,  $t(\text{major}) = 49.2$  min;  $^1\text{H}$  NMR (400 MHz,  $\text{CDCl}_3$ )  $\delta = 7.31$ -7.28 (m, 2H), 7.23-7.21 (m, 3H), 3.67-3.61 (m, 1H), 3.58 (s, 3H), 2.80-2.62 (m, 4H) ppm;  $^{13}\text{C}$  NMR (100 MHz,  $\text{CDCl}_3$ )  $\delta = 177.7, 172.1, 142.3, 128.7, 127.2, 127.1, 51.6, 40.4, 40.2, 37.9$  ppm.

**(*R*)-3-(4-Chlorophenyl)-5-methoxy-5-oxopentanoic acid (9j)**

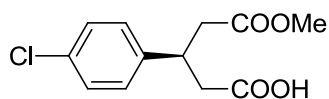

**9j**

White solid, yield 87%, 78% *ee*;  $[\alpha]_{\text{D}}^{25} = +3.2$  ( $c = 1.0$  in  $\text{CHCl}_3$ ) (lit.<sup>[7]</sup>  $[\alpha]_{\text{D}}^{25} = -8.0$  ( $c = 0.88$  in  $\text{CHCl}_3$ ) for (*S*)-**9j**); Chiral HPLC (Chiralcel OD-H column), Hexane/*i*-PrOH = 92/8, Flow rate: 0.5 mL/min, UV detection at 220 nm,  $T = 30^\circ\text{C}$ , retention time:  $t(\text{minor}) = 47.7$  min,  $t(\text{major}) = 53.3$  min;  $^1\text{H}$  NMR (400 MHz, DMSO)  $\delta = 7.24$  (s, 2H), 7.14 (d,  $J = 8.4$  Hz, 2H), 3.63-3.57 (m, 4H), 2.77-2.56 (m, 4H) ppm;  $^{13}\text{C}$  NMR (100 MHz,  $\text{CDCl}_3$ )  $\delta = 177.3, 171.8, 140.7, 132.8, 128.8, 128.6, 51.7, 40.2, 40.0, 37.3$  ppm.

**(*R*)-5-Methoxy-5-oxo-3-(*p*-tolyl)pentanoic acid (9k)**

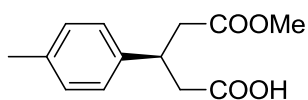

**9k**

White solid, yield 92%, 79% *ee*;  $[\alpha]_{\text{D}}^{25} = +5.7$  ( $c = 1.0$  in  $\text{CHCl}_3$ ) (lit.<sup>[8]</sup>  $[\alpha]_{\text{D}}^{20} = +5.2$  ( $c = 1.0$  in  $\text{CHCl}_3$ )); Chiral HPLC (Chiralcel IA-H column), Hexane/*i*-PrOH = 95/5, Flow rate: 1.0 mL/min, UV detection at 220 nm,  $T = 30^\circ\text{C}$ , retention time:  $t(\text{minor}) = 41.1$  min,  $t(\text{major}) = 47.8$  min;  $^1\text{H}$  NMR (400MHz,  $\text{CDCl}_3$ ):  $\delta = 7.10$  (s, 4H), 3.63–3.56 (m, 4H), 2.78–2.60 (m, 4H), 2.31 (s, 3H) ppm;  $^{13}\text{C}$  NMR (100 MHz,  $\text{CDCl}_3$ )  $\delta = 177.6, 172.1, 139.3, 136.6, 129.3, 127.0, 51.6, 40.5, 40.3, 37.5, 21.0$  ppm.

**(*R*)-5-Methoxy-3-(4-methoxyphenyl)-5-oxopentanoic acid (9l)**

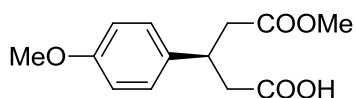

**9l**

White solid, yield 91%, 80% *ee*;  $[\alpha]_{\text{D}}^{25} = -4.7$  ( $c = 1.0$  in EtOH) (lit.<sup>[6]</sup>  $[\alpha]_{\text{D}}^{20} = +7.6$  ( $c = 0.6$  in EtOH) for (*S*)-**9l**); Chiral HPLC (Chiralcel AD-H column), Hexane/*i*-PrOH = 93/7, Flow rate: 0.6 mL/min, UV detection at 220 nm,  $T = 30^\circ\text{C}$ , retention time:  $t(\text{minor}) = 87.91$  min,  $t(\text{major}) = 103.9$  min;  $^1\text{H}$  NMR (400 MHz,  $\text{CDCl}_3$ )  $\delta = 7.13$  (d,  $J = 8.5$  Hz, 2H), 6.83 (d,  $J = 8.5$  Hz, 2H), 3.77 (s, 3H), 3.62-3.54 (m, 4H), 2.77-2.58 (m, 4H) ppm;  $^{13}\text{C}$  NMR (100 MHz, DMSO)  $\delta = 173.2, 172.2, 158.3, 135.4, 128.8, 114.0, 55.3, 51.6, 40.7, 40.6, 37.7$  ppm.



**(1S,6R)-6-(Ethoxycarbonyl)cyclohex-3-enecarboxylic acid (9m)**

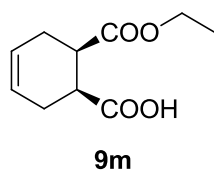

White solid, yield 97%, 93% *ee*;  $[\alpha]_D^{25} = -1.2$  ( $c = 1.0$  in  $\text{CHCl}_3$ ); Chiral HPLC (Chiralcel IA-H column), Hexane/*i*-PrOH = 94/6, Flow rate: 0.5 mL/min, UV detection at 220 nm,  $T = 30^\circ\text{C}$ , retention time:  $t(\text{minor}) = 25.7$  min,  $t(\text{major}) = 29.5$  min;  $^1\text{H}$  NMR (400 MHz,  $\text{CDCl}_3$ )  $\delta = 11.14$  (br, 1H), 5.68 – 5.62 (m, 2H), 4.13 (q,  $J = 7.0$  Hz, 2H), 3.03-3.02 (m, 2H), 2.58-2.51 (m, 2H), 2.34 (d,  $J = 18.4$  Hz, 2H), 1.21 (t,  $J = 7.1$  Hz, 3H);  $^{13}\text{C}$  NMR (101 MHz,  $\text{CDCl}_3$ )  $\delta = 179.9, 173.2, 125.2, 125.0, 60.8, 39.7, 39.6, 25.9, 25.5, 14.0$  ppm.

**(1S,6R)-6-(Isopropoxycarbonyl)cyclohex-3-enecarboxylic acid (9n)**

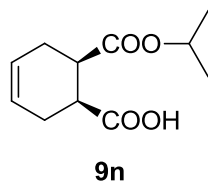

White solid, yield 93%, 89% *ee*;  $[\alpha]_D^{25} = -7.5$  ( $c = 1.0$  in  $\text{CHCl}_3$ ); Chiral HPLC (Chiralcel IA-H column), Hexane/*i*-PrOH = 94/6, Flow rate: 0.5 mL/min, UV detection at 220 nm,  $T = 30^\circ\text{C}$ , retention time:  $t(\text{minor}) = 30.4$  min,  $t(\text{major}) = 36.1$  min;  $^1\text{H}$  NMR (400 MHz,  $\text{CDCl}_3$ )  $\delta = 11.18$  (br, 1H), 5.69-5.62 (m, 2H), 5.00 (dt,  $J = 12.4, 6.2$  Hz, 1H), 3.02 (s, 2H), 2.58-2.50 (m, 2H), 2.33 (d,  $J = 16.5$  Hz, 2H), 1.19-1.18 (m, 6H) ppm;  $^{13}\text{C}$  NMR (100 MHz,  $\text{CDCl}_3$ )  $\delta = 180.2, 172.6, 125.3, 125.0, 68.3, 39.7, 25.9, 25.4, 21.7, 21.6$  ppm.

**(1S,6R)-6-((Allyloxy)carbonyl)cyclohex-3-enecarboxylic acid (9o)**

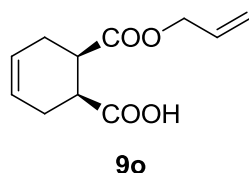

White solid, yield 90%, 85% *ee*;  $[\alpha]_D^{25} = -0.7$  ( $c = 1.0$  in  $\text{CHCl}_3$ ); Chiral HPLC (Chiralcel IA-H column), Hexane/*i*-PrOH = 94/6, Flow rate: 0.5 mL/min, UV detection at 220 nm,  $T = 30^\circ\text{C}$ , retention time:  $t(\text{minor}) = 30.3$  min,  $t(\text{major}) = 36.2$

min;  $^1\text{H}$  NMR (400 MHz,  $\text{CDCl}_3$ )  $\delta$  = 11.11 (br, 1H), 5.92-5.82 (m, 1H), 5.69-5.64 (m, 2H), 5.28 (d,  $J$  = 17.2Hz, 1H), 5.19 (d,  $J$  = 10.5Hz, 1H), 4.62-4.54 (m, 2H), 3.06 (d,  $J$  = 5.9 Hz, 2H), 2.62-2.53 (m, 2H), 2.39-2.34 (m, 2H) ppm;  $^{13}\text{C}$  NMR (100 MHz,  $\text{CDCl}_3$ )  $\delta$  = 179.7, 172.9, 132.1, 125.2, 118.1, 65.4, 39.7, 39.6, 25.9, 25.6 ppm.

**(1*S*,6*R*)-6-((Benzyloxy)carbonyl)cyclohex-3-enecarboxylic acid (9p)**

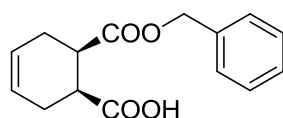

**9p**

White solid, yield 98%, 86% *ee*;  $[\alpha]_{\text{D}}^{25}$  = -1.0 ( $c$  = 1.0 in  $\text{CHCl}_3$ ); Chiral HPLC (Chiralcel AD-H column), Hexane/*i*-PrOH = 95/5, Flow rate: 0.2 mL/min, UV detection at 210 nm,  $T$  = 30°C, retention time:  $t(\text{major})$  = 69.6 min,  $t(\text{minor})$  = 75.6 min;  $^1\text{H}$  NMR (400 MHz,  $\text{CDCl}_3$ )  $\delta$  = 10.51 (br, 1H), 7.37-7.29 (m, 5H), 5.69 (s, 2H), 5.19-5.11 (m, 2H), 3.11 (t,  $J$  = 5.2 Hz, 2H), 2.66-2.57 (m, 2H), 2.42-2.35 (m, 2H) ppm;  $^{13}\text{C}$  NMR (100 MHz,  $\text{CDCl}_3$ )  $\delta$  = 179.8, 173.0, 135.9, 128.5, 128.2, 128.1, 125.2, 125.1, 66.6, 39.7, 39.6, 25.8, 25.6 ppm.

**(1*S*,6*R*)-6-((Cinnamyloxy)carbonyl)cyclohex-3-enecarboxylic acid (9q)**

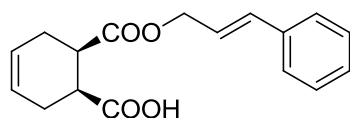

**9q**

White solid, yield 99%, 90% *ee*;  $[\alpha]_{\text{D}}^{25}$  = -3.6 ( $c$  = 1.0 in  $\text{CHCl}_3$ ); Chiral HPLC (Chiralcel AD-H column), Hexane/*i*-PrOH = 94/6, Flow rate: 0.5 mL/min, UV detection at 254 nm,  $T$  = 30°C, retention time:  $t(\text{minor})$  = 31.1 min,  $t(\text{major})$  = 34.6 min;  $^1\text{H}$  NMR (400 MHz,  $\text{CDCl}_3$ )  $\delta$  = 7.42-7.29 (m, 5H), 6.64 (d,  $J$  = 3.2 Hz, 2H), 6.41-6.36 (m, 1H), 5.73 (s, 2H), 4.34-4.33 (m, 2H), 3.14-3.09 (m, 2H), 2.66-2.62 (m, 2H), 2.43-2.39 (m, 2H) ppm;  $^{13}\text{C}$  NMR (100 MHz,  $\text{CDCl}_3$ )  $\delta$  = 177.7, 173.2, 136.7, 131.0, 128.5, 127.6, 126.4, 125.1, 123.1, 65.3, 63.4, 39.7, 39.6, 25.8, 25.6 ppm.

## 6. Catalytic asymmetric synthesis of (S)-GABOB by 7i

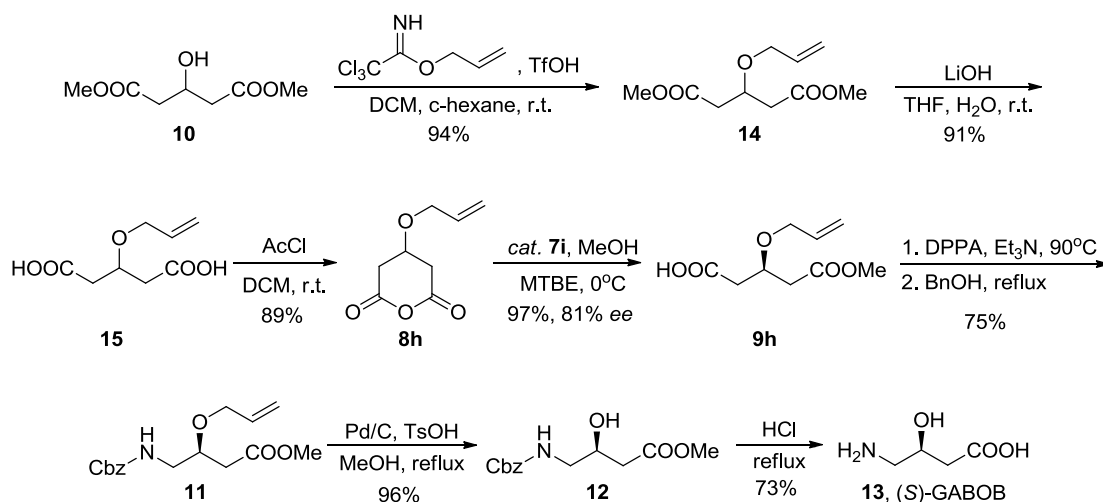

### Dimethyl 3-(allyloxy)pentanedioate (14)

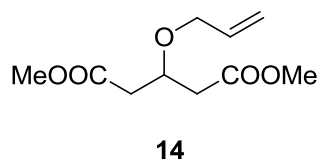

Under N<sub>2</sub> atmosphere, to a stirred solution of dimethyl 3-hydroxypentanedioate (40 g, 0.23 mol) and allyl 2,2,2-trichloroacetimidate (91.9 g, 0.46 mol) in 1000 mL of 4:1 c-hexane/CH<sub>2</sub>Cl<sub>2</sub> at 0 °C was added TfOH (4 mL, 46 mmol). After addition, the reaction mixture was stirred for 24 h at room temperature and then filtered. The filtrate was washed with NaHCO<sub>3</sub> (2 × 200 mL), dried over Na<sub>2</sub>SO<sub>4</sub> and concentrated under reduced pressure to give yellow oil. The crude product was purified by flash chromatography using PE/EA 9:1 to give product **14** (45.6 g, 93%) as colourless oil; <sup>1</sup>H NMR (400 MHz, CDCl<sub>3</sub>) δ = 5.90-5.81 (m, 1H), 5.24 (dd, *J* = 17.2, 1.3 Hz, 1H), 5.15 (d, *J* = 10.5 Hz, 1H), 4.21 (p, *J* = 6.3 Hz, 1H), 4.04 (d, *J* = 5.7 Hz, 2H), 3.68 (s, 6H), 2.60 (qd, *J* = 15.5, 6.3 Hz, 4H) ppm; <sup>13</sup>C NMR (100 MHz, CDCl<sub>3</sub>) δ = 170.8, 134.0, 116.5, 71.7, 70.4, 51.1, 38.8 ppm; HRMS (ESI<sup>+</sup>) calcd for C<sub>10</sub>H<sub>16</sub>O<sub>5</sub> [M+Na]<sup>+</sup> = 239.0895, found: 239.0892.

### 3-(Allyloxy)pentanedioic acid (15)

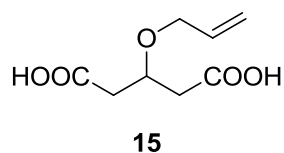

To a stirred solution of **14** (45 g, 0.21 mol) in 750 mL of 4:1 THF/H<sub>2</sub>O was added LiOH·H<sub>2</sub>O (22.03 g, 0.53 mol) at 0 °C. The reaction mixture was stirred at room temperature for 24 h before the THF was evaporated. The aqueous layer was washed with EtOAc (2 × 100 mL), acidified with 2 N HCl, and then extracted with EtOAc (3 × 200 mL). The organic phase was washed with brine (300 mL), dried over Na<sub>2</sub>SO<sub>4</sub> and concentrated to afford **15** (35.6 g, 91%) as yellow oil; <sup>1</sup>H NMR (400 MHz, CDCl<sub>3</sub>) δ = 9.23 (br, 2H), 5.93 – 5.83 (m, 1H), 5.27 (dd, *J* = 17.2, 1.5 Hz, 1H), 5.19-5.16 (m, 1H), 4.22 (p, *J* = 6.2 Hz, 1H), 4.08 (d, *J* = 5.7 Hz, 2H), 2.69 (qd, *J* = 15.8, 6.2 Hz, 4H) ppm; <sup>13</sup>C NMR (100 MHz, CDCl<sub>3</sub>) δ = 176.9, 134.1, 117.5, 71.7, 71.0, 39.1 ppm; HRMS (ESI<sup>+</sup>) calcd for C<sub>8</sub>H<sub>13</sub>O<sub>5</sub> [M+H]<sup>+</sup> = 189.0763, found: 189.0757.

### 3-(Allyloxy)glutaric anhydride (**8h**)

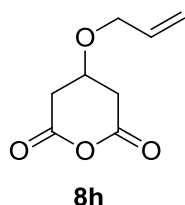

To a stirred suspension of **15** (33 g, 0.18 mol) in 500 mL of CH<sub>2</sub>Cl<sub>2</sub> at 0 °C was added AcCl (124 mL, 1.8 mmol). The reaction mixture was stirred at room temperature for 12 h and concentrated. The crude product was dissolved in 500 mL of CH<sub>2</sub>Cl<sub>2</sub>, washed with NaHCO<sub>3</sub> (3 × 300 mL) and brine (300mL), dried over Na<sub>2</sub>SO<sub>4</sub> and concentrated to afford **8h** (26.5 g, 89%) as a yellow oil; <sup>1</sup>H NMR (400 MHz, CDCl<sub>3</sub>) δ = 5.89-5.79 (m, 1H), 5.30-5.21 (m, 2H), 4.08-4.03 (m, 3H), 3.09 (dd, *J* = 16.6, 3.5 Hz, 2H), 2.75 (d, *J* = 18.9 Hz, 2H) ppm; <sup>13</sup>C NMR (100 MHz, CDCl<sub>3</sub>) δ = 165.0, 133.4, 118.1, 69.9, 67.0, 35.7 ppm; HRMS (ESI<sup>+</sup>) calcd for C<sub>8</sub>H<sub>10</sub>O<sub>4</sub> [M+H]<sup>+</sup> = 171.0657, found: 171.0652.

### (*R*)-3-(Allyloxy)-5-methoxy-5-oxopentanoic acid (**9h**)

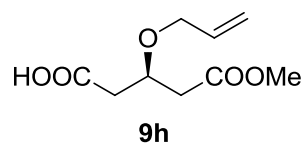

MeOH (10.1 mL, 250 mmol) was added dropwise at 0 °C under nitrogen to a stirred solution of *meso*-cyclic anhydride **8h** (4.26 g, 25 mmol) and **7i** (1.80 g, 2.5 mmol) in

MTBE (2 L). The reaction was monitored by using thin-layer chromatography. After 96 h, anhydride consumption was complete, the solvent was evaporated under reduced pressure and the residue was dissolved in CH<sub>2</sub>Cl<sub>2</sub> (300 mL). The solution was washed with saturated Na<sub>2</sub>CO<sub>3</sub> (3 × 150 mL) and the combined aqueous layers were acidified with excess 2 N HCl, followed by extraction with EtOAc (3 × 300 mL). The combined organic layers were dried over Na<sub>2</sub>SO<sub>4</sub> and concentrated to afford momoester **9h** (4.9 g, yield 97%, 81% *ee*) as light yellow oil;  $[\alpha]_D^{25} = -3.5$  ( $c = 1.0$  in CHCl<sub>3</sub>); Chiral HPLC (Chiralcel AD-H column), Hexane/*i*-PrOH = 95/5, Flow rate: 0.6 mL/min, UV detection at 220 nm,  $T = 30$  °C, retention time:  $t(\text{minor}) = 50.6$  min,  $t(\text{major}) = 56.1$  min; Chiral HPLC (Chiralcel AD-H column), Hexane/*i*-PrOH=95/5, Flow rate: 0.6 mL/min, UV detection at 220 nm,  $t(\text{minor}) = 50.6$  min,  $t(\text{major}) = 56.1$  min; <sup>1</sup>H NMR (400 MHz, CDCl<sub>3</sub>)  $\delta = 5.91\text{-}5.82$  (m, 1H), 5.25 (dd,  $J = 17.2, 1.2$  Hz, 1H), 5.16 (d,  $J = 10.4$  Hz, 1H), 4.21 (p,  $J = 6.2$  Hz, 1H), 4.06 (d,  $J = 5.7$  Hz, 2H), 3.69 (s, 3H), 2.68-2.57 (m, 4H) ppm; <sup>13</sup>C NMR (100 MHz, CDCl<sub>3</sub>)  $\delta = 176.6, 171.3, 134.2, 117.2, 71.9, 70.9, 51.7, 39.2, 39.1$  ppm; HRMS (ESI<sup>+</sup>) calcd for C<sub>9</sub>H<sub>14</sub>O<sub>5</sub> [M+Na]<sup>+</sup> = 225.0739, found: 225.0733.

**(S)-Methyl 3-(allyloxy)-4-(((benzyloxy)carbonyl)amino)butanoate (11)**

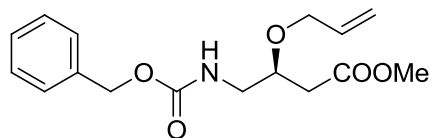

**11**

Diphenylphosphoryl azide (6.5 mL, 30 mmol) was added to a dry toluene solution (100 mL) of **9h** (5 g, 25 mmol) and triethylamine (4.2 mL, 30 mmol) at room temperature. The reaction mixture was stirred for 30 min and then it was slowly warmed to 90 °C. When the evolution of nitrogen ceased (30 min), benzyl alcohol (3.1 mL, 30 mmol) was added, and the mixture was heated at reflux overnight. The reaction mixture was washed with NaNO<sub>2</sub> (1% aq., 2 × 250 mL), NaHCO<sub>3</sub> (2 × 250 mL), H<sub>2</sub>O (250 mL), dried over Na<sub>2</sub>SO<sub>4</sub> and concentrated to afford brown oil. The crude product was purified by flash chromatography using PE/EA 10:1 to give product **11** (5.7 g, 75%) as light yellow oil;  $[\alpha]_D^{25} = +5.4$  ( $c = 1.0$  in CHCl<sub>3</sub>); <sup>1</sup>H NMR

(400 MHz, CDCl<sub>3</sub>)  $\delta$  = 7.35-7.30 (m, 5H), 5.89-5.80 (m, 1H), 5.23 (d,  $J$  = 17.2 Hz, 1H), 5.15 (d,  $J$  = 10.2 Hz, 2H), 5.09 (s, 2H), 4.02 (d,  $J$  = 4.9 Hz, 2H), 3.92-3.90 (m, 1H), 3.67 (s, 3H), 3.42-3.37 (m, 1H), 3.33-3.27 (m, 1H), 2.59-2.45 (m, 2H) ppm; <sup>13</sup>C NMR (100 MHz, CDCl<sub>3</sub>)  $\delta$  = 171.4, 156.6, 136.5, 134.4, 128.5, 128.2, 128.1, 117.4, 74.4, 70.8, 66.8, 51.8, 43.8, 37.4 ppm; HRMS (ESI<sup>+</sup>) calcd for C<sub>16</sub>H<sub>21</sub>NO<sub>5</sub> [M+Na]<sup>+</sup> = 330.1317, found: 330.1306.

**(S)-Methyl 4-(((benzyloxy)carbonyl)amino)-3-hydroxybutanoate (12)**

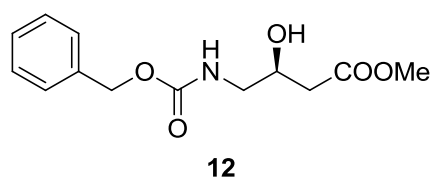

To a solution of **11** (0.9 g, 3 mmol) and Pd/C (450 mg) in MeOH (30 mL) was added 4-methylbenzenesulfonic acid (57 mg, 0.3 mmol). The reaction mixture was heated at reflux for 3 h and filtered. The filtrate was concentrated to afford yellow oil. The crude product was purified by flash chromatography using PE/EA 5:1 to give product **12** (0.75 g, 96%) as light yellow oil;  $[\alpha]_D^{25}$  = +2.5 ( $c$  = 1.0 in CHCl<sub>3</sub>); <sup>1</sup>H NMR (400 MHz, CDCl<sub>3</sub>)  $\delta$  = 7.34 (s, 5H), 5.29 (br, 1H), 5.10 (s, 2H), 4.12 (br, 1H), 3.70 (s, 3H), 3.44 (s, 1H), 3.38 (s, 1H), 3.22-3.15 (m, 1H), 2.54-2.44 (m, 2H) ppm; <sup>13</sup>C NMR (100 MHz, CDCl<sub>3</sub>)  $\delta$  = 172.9, 157.0, 136.4, 128.6, 128.3, 128.2, 67.5, 67.0, 52.0, 45.9, 38.4 ppm.

**(S)-GABOB (13)**

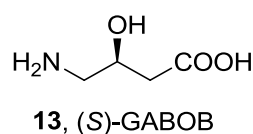

(S)-methyl 4-(((benzyloxy)carbonyl)amino)-3-hydroxybutanoate (**12**, 5 g, 19 mmol) was added to 16 N HCl (60 mL) and then the reaction mixture was heated at reflux overnight. The mixture was concentrated under reduced pressure and the residue was crystallized from EtOH to give white solid, then dissolved in H<sub>2</sub>O (5 mL) and added NaOH (0.54 g). The stirred suspension was added H<sub>2</sub>O until the solid disappeared, then EtOH (20 mL) was added and filtered, oven dry the filter cake to afford (S)-GABOB (**13**, 1.63 g, 73%) as white solid; 96% *ee*, determined from optical

rotation,  $[\alpha]_{\text{D}}^{25} = +19.7$  ( $c = 1.4$  in  $\text{H}_2\text{O}$ ) (lit.<sup>[9]</sup>  $[\alpha]_{\text{D}}^{25} = +20.56$  ( $c = 1.41$  in  $\text{H}_2\text{O}$ )), recrystallization from 78% EtOH further increased the optical purity to 99% *ee*,  $[\alpha]_{\text{D}}^{25} = +20.4$  ( $c = 1.5$  in  $\text{H}_2\text{O}$ );  $^1\text{H}$  NMR (400 MHz,  $\text{D}_2\text{O}$ )  $\delta = 4.21$ -4.15 (m, 1H), 3.15 (dd,  $J = 13.1, 3.0$  Hz, 1H), 2.93 (dd,  $J = 13.1, 9.5$  Hz, 1H), 2.41 (d,  $J = 6.5$  Hz, 2H) ppm;  $^{13}\text{C}$  NMR (100 MHz,  $\text{D}_2\text{O}$ )  $\delta = 178.6, 65.5, 44.1, 42.3$  ppm; HRMS (ESI<sup>+</sup>) calcd for  $\text{C}_4\text{H}_9\text{NO}_3$   $[\text{M}+\text{H}]^+ = 120.0661$ , found: 120.0654.

## 7. References

- [1] M. N. Patil, R. G. Gonnade, N. N. Joshi, *Tetrahedron* **2010**, *66*, 5036-5041.
- [2] A. Peschiulli, Y. Gun'ko, S. J. Connon, *J. Org. Chem.* **2008**, *73*, 2454-2457.
- [3] Y. -G. Chen, S. -K. Tian, L. Deng, *J. Am. Chem. Soc.* **2000**, *122*, 9542-9543
- [4] S. -X. Wang, F. -E. Chen, *Adv. Synth. Catal.* **2009**, *351*, 547-552.
- [5] S. E. Park, E. H. Nam, H. B. Jang, J. S. Oh, S. Some, Y. S. Lee, C. E. Song, *Adv. Synth. Catal.* **2010**, *352*, 2211-2217.
- [6] A. Fryszkowska, M. Komar, D. Koszelewskia, R. Ostaszewski, *Tetrahedron: Asymmetry* **2005**, *16*, 2475-2485.
- [7] H. -J. Yang, F. -J. Xiong, J. Li, F. -E., Chen, *Chinese. Chem. Lett.* **2013**, *24*, 553-558.
- [8] L. -J. Yan, H. F. Wang, W. X. Chen, Y. Tao, K. J. Jin, F. E. Chen, *ChemCatChem.* **2016**, *8*, 2249 – 2253.
- [9] T. Ivšić, I. Dokli, A. Rimac, Z. Hameršak, *Eur. J. Org. Chem.* **2014**, 631-638.

## 8. Copies of NMR spectra and chiral HPLC spectra

### *N*-((1*R*,2*R*)-2-(Dimethylamino)-1-(4-nitrophenyl)-3-(trityloxy)propyl)-4-(trifluoromethyl)benzamide (7a)

<sup>1</sup>H NMR

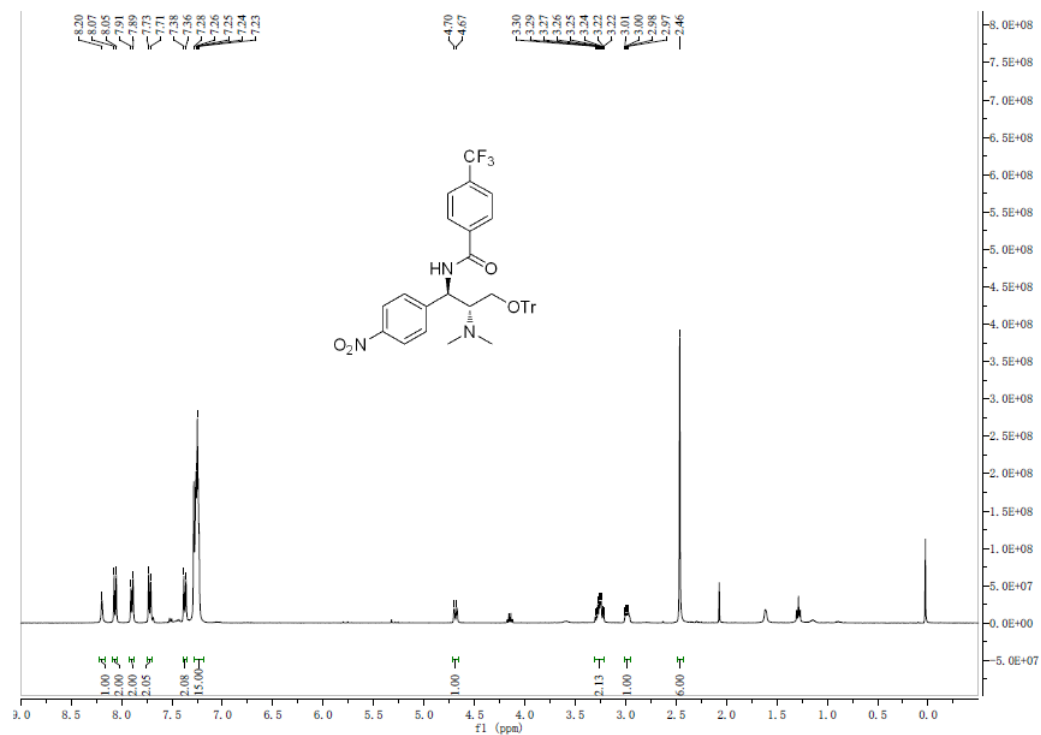

<sup>13</sup>C NMR

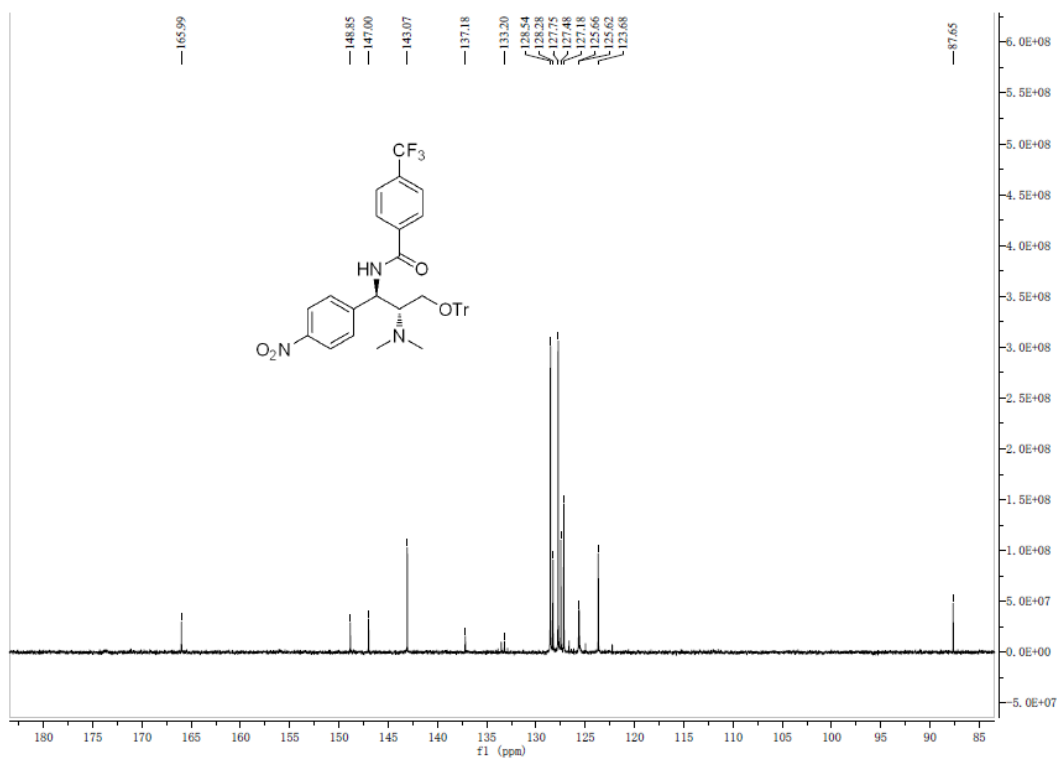



## HRMS

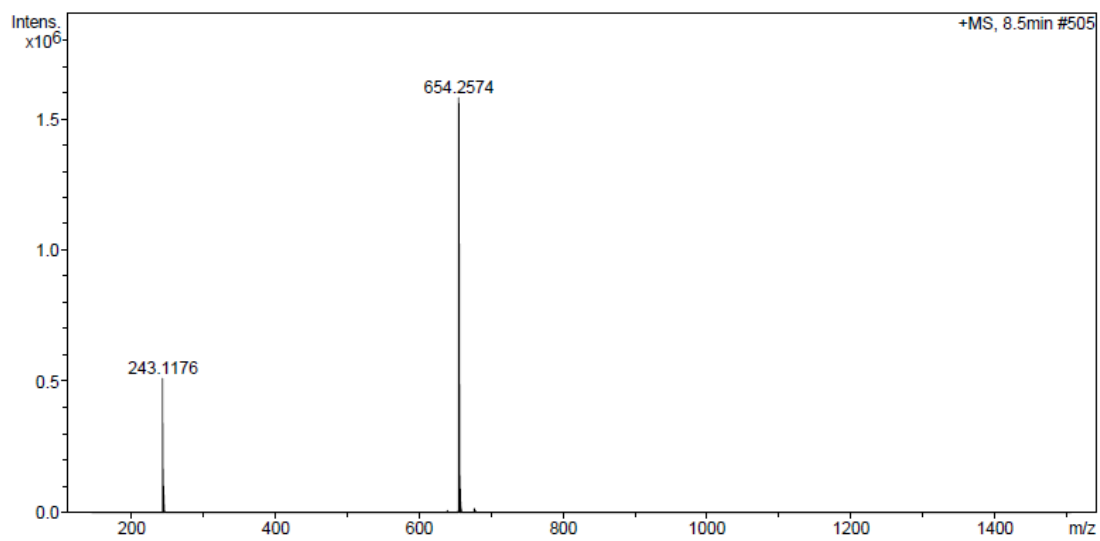

## *N*-((1*R*,2*R*)-2-(Dimethylamino)-1-(4-nitrophenyl)-3-(trityloxy)propyl)-4-nitrobenzamide (7b)

### <sup>1</sup>H NMR

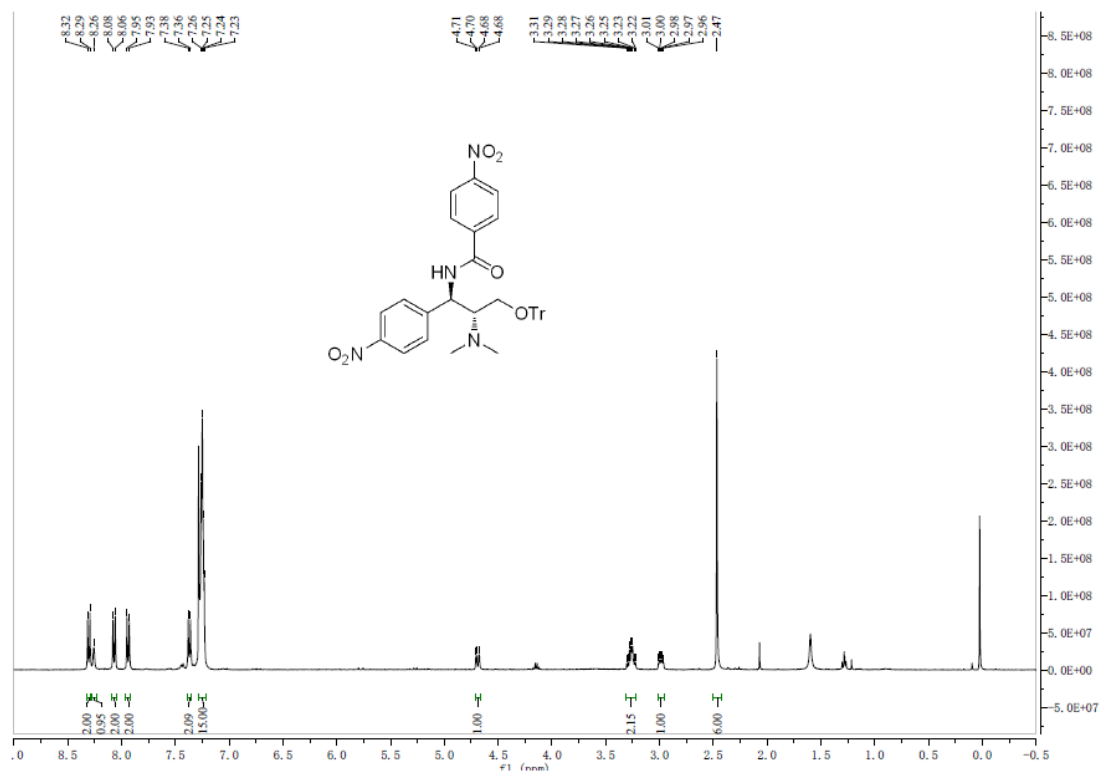

# <sup>13</sup>C NMR

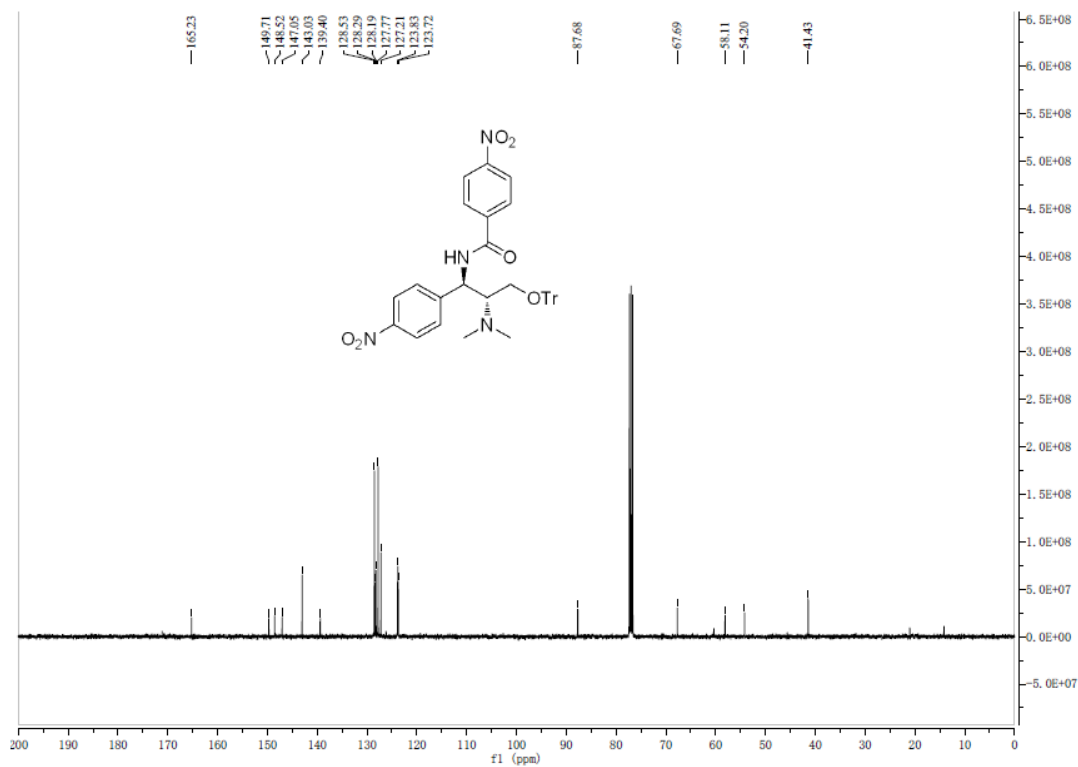

# HRMS

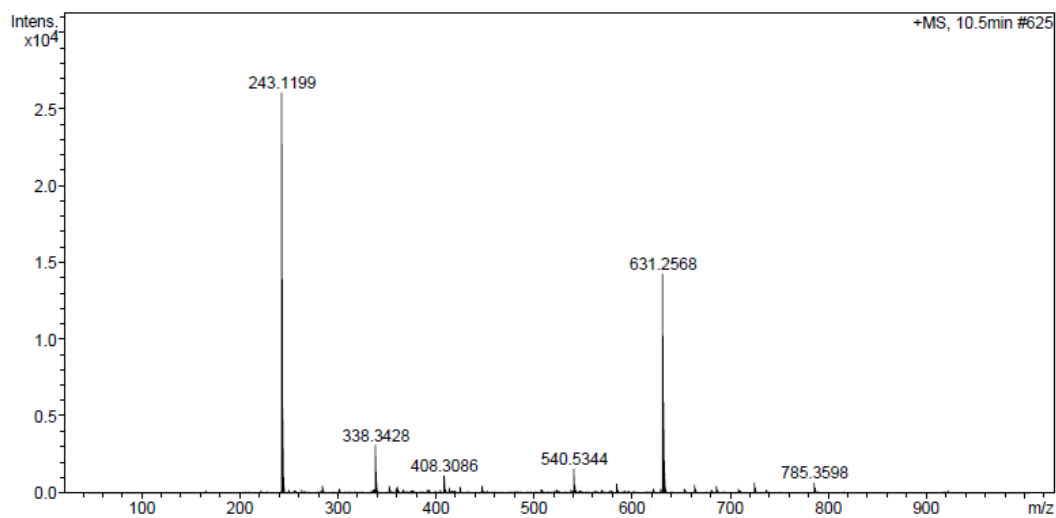

***N*-((1*R*,2*R*)-2-(Dimethylamino)-1-(4-nitrophenyl)-3-(trityloxy)propyl)-4-fluorobenzamide (7c)**

<sup>1</sup>H NMR

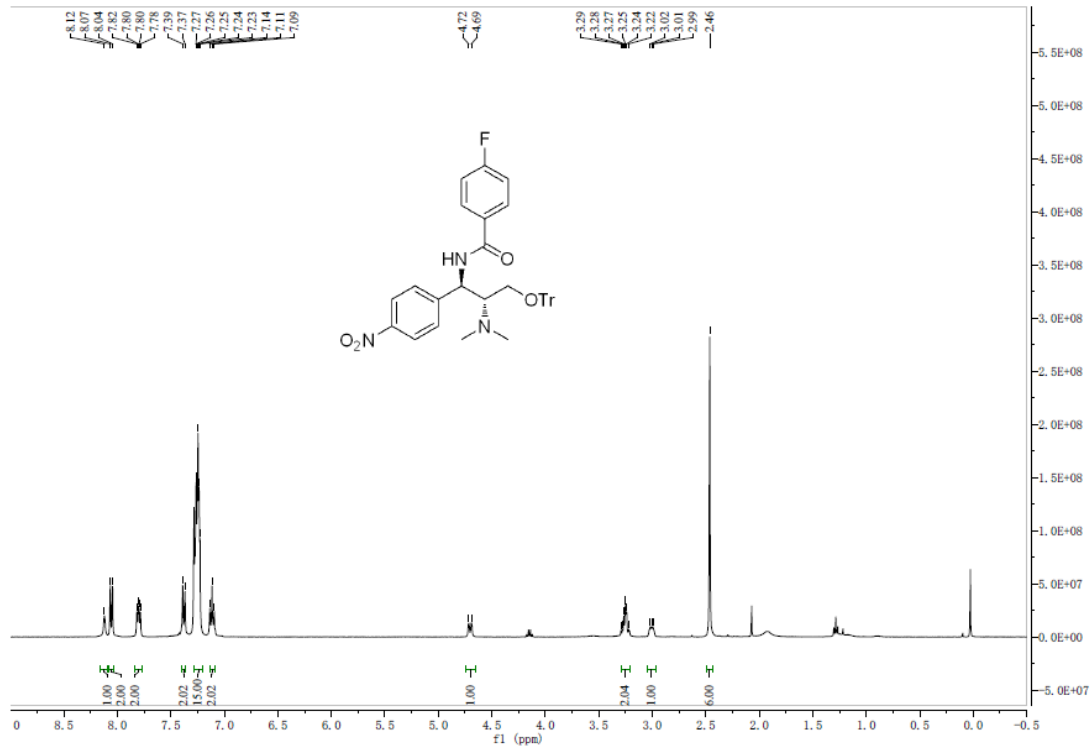

<sup>13</sup>C NMR

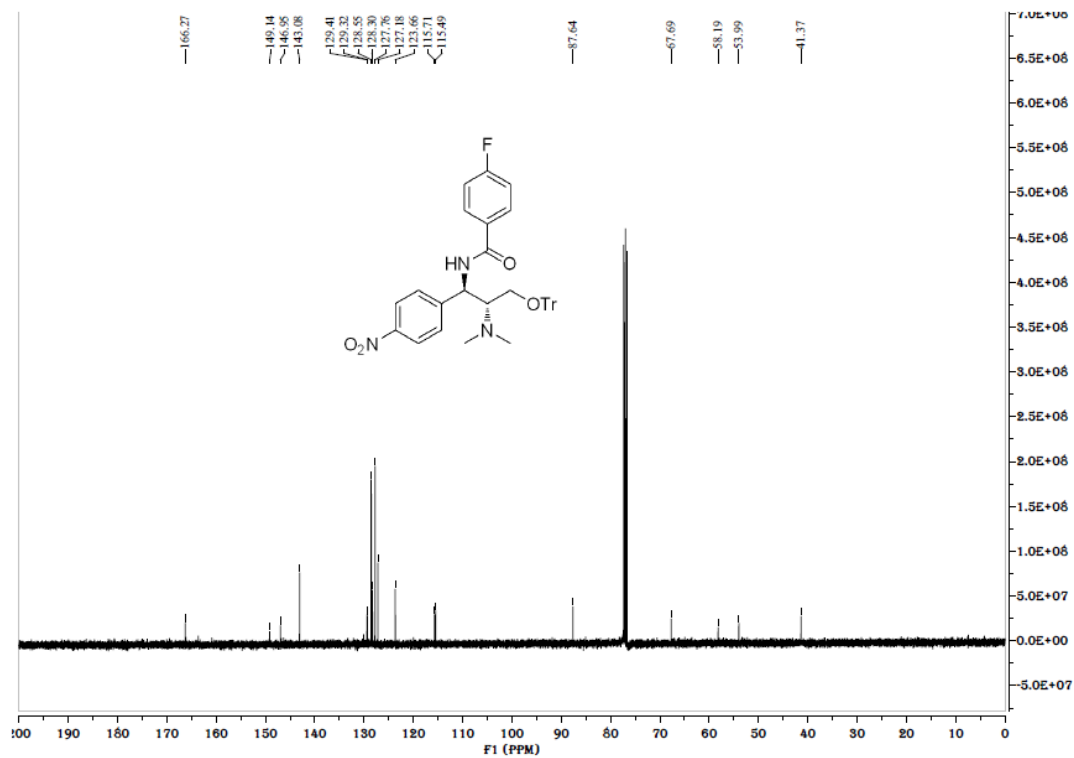

# HRMS

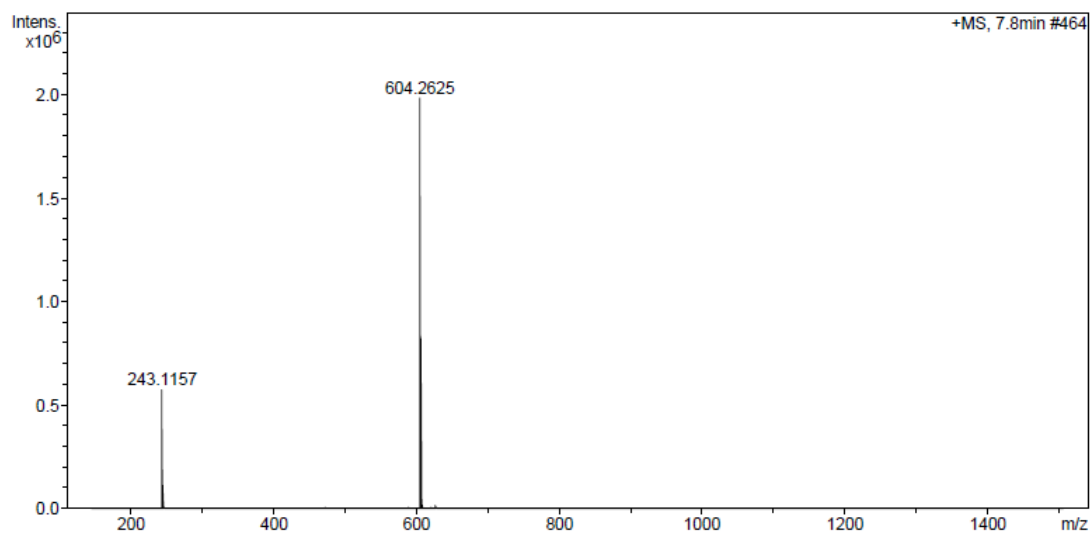

## 4-Chloro-*N*-((1*R*,2*R*)-2-(dimethylamino)-1-(4-nitrophenyl)-3-(trityloxy)propyl)-benzamide (7d)

### <sup>1</sup>H NMR

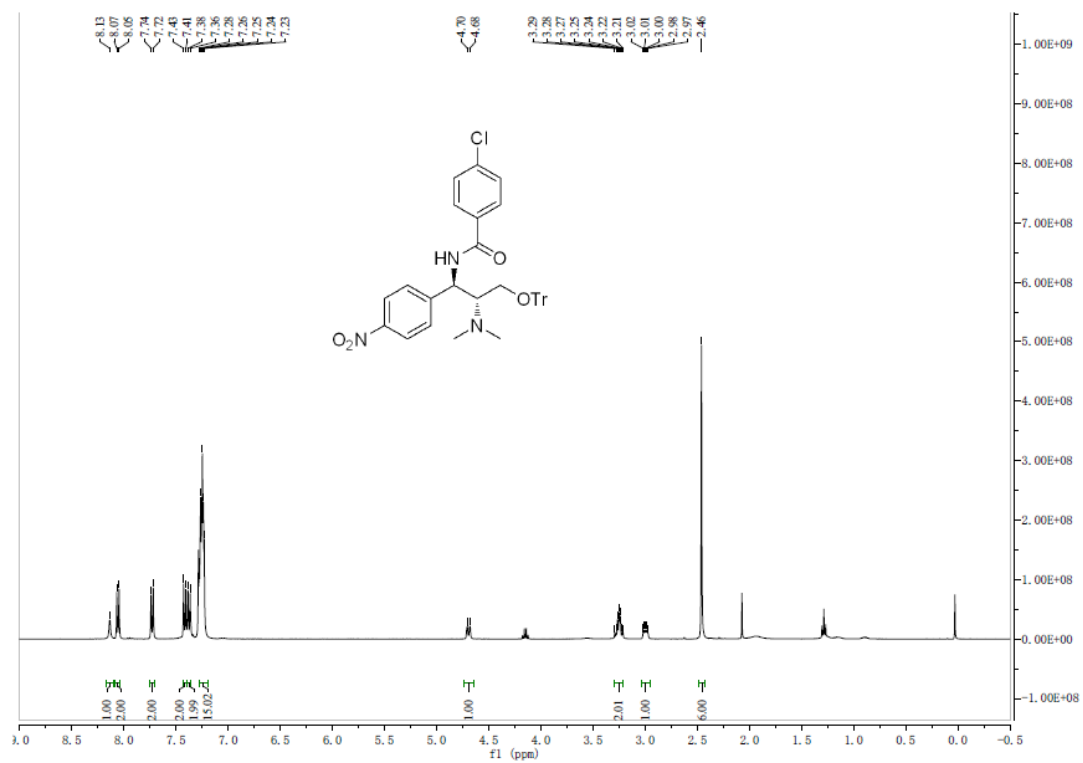

# <sup>13</sup>C NMR

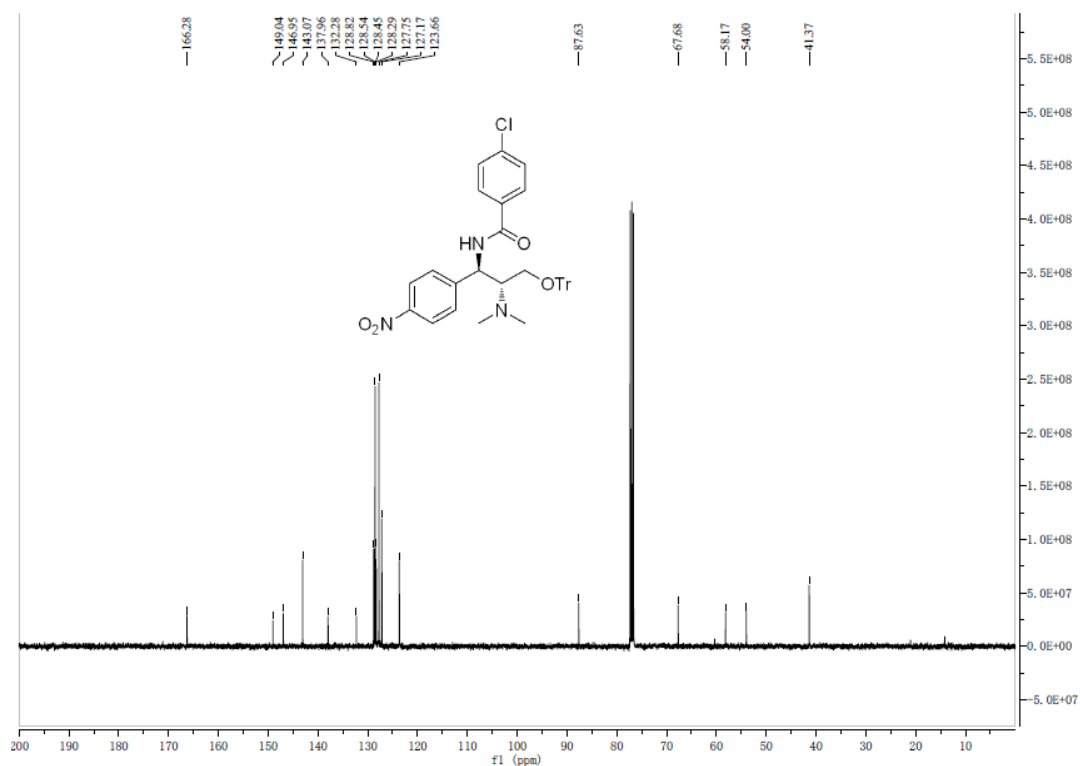

# HRMS

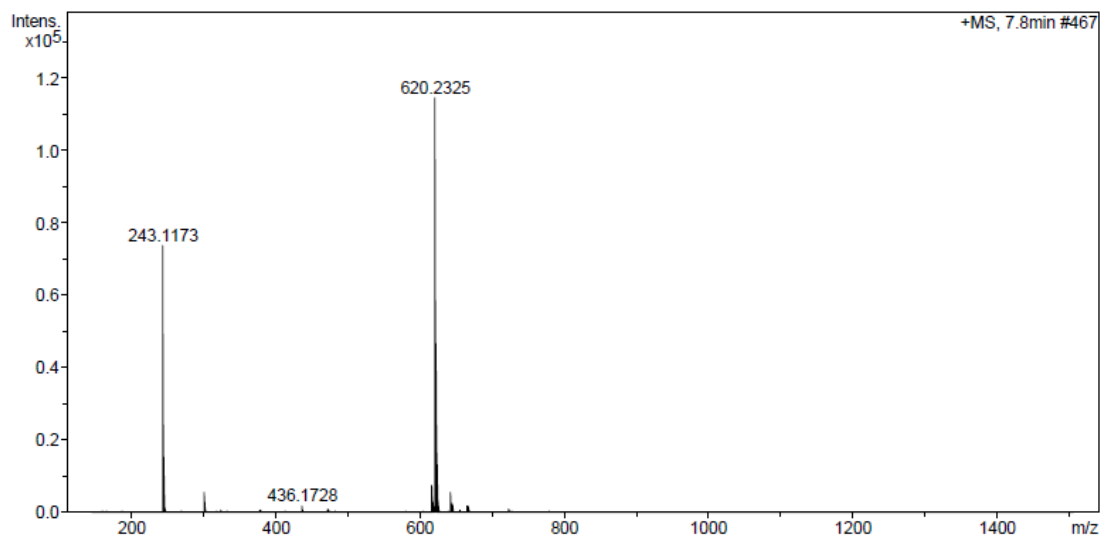

**4-Bromo-N-((1R,2R)-2-(dimethylamino)-1-(4-nitrophenyl)-3-(trityloxy)propyl)-benzamide (7e)**

$^1\text{H}$  NMR

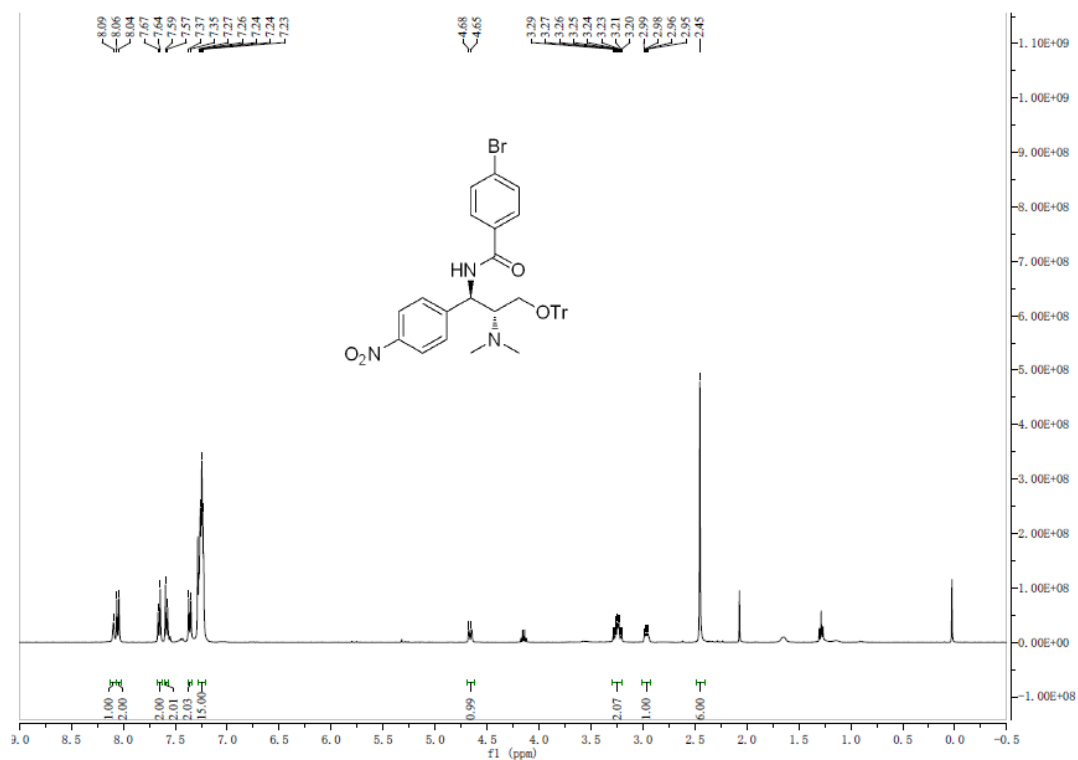

$^{13}\text{C}$  NMR

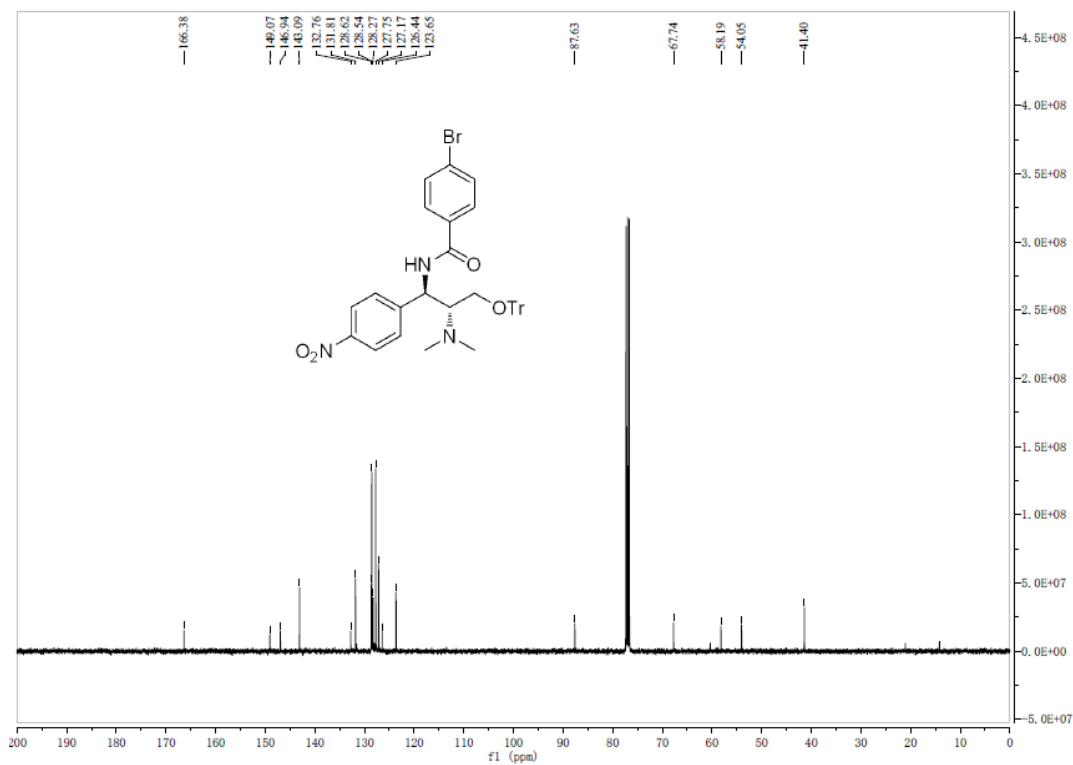

HRMS

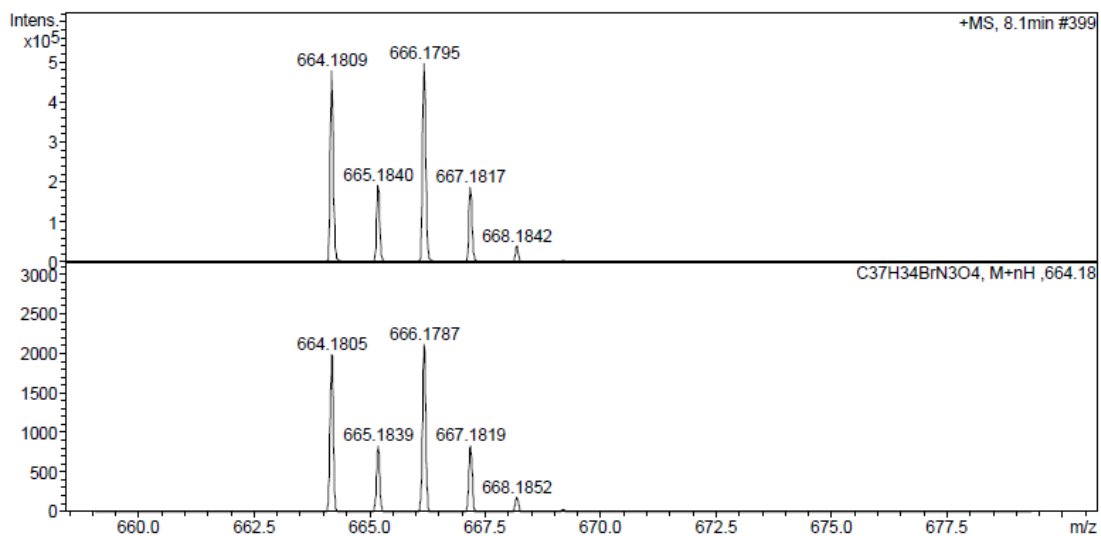

***N*-((1*R*,2*R*)-2-(Dimethylamino)-1-(4-nitrophenyl)-3-(trityloxy)propyl)benzamide  
(7f)**

<sup>1</sup>H NMR

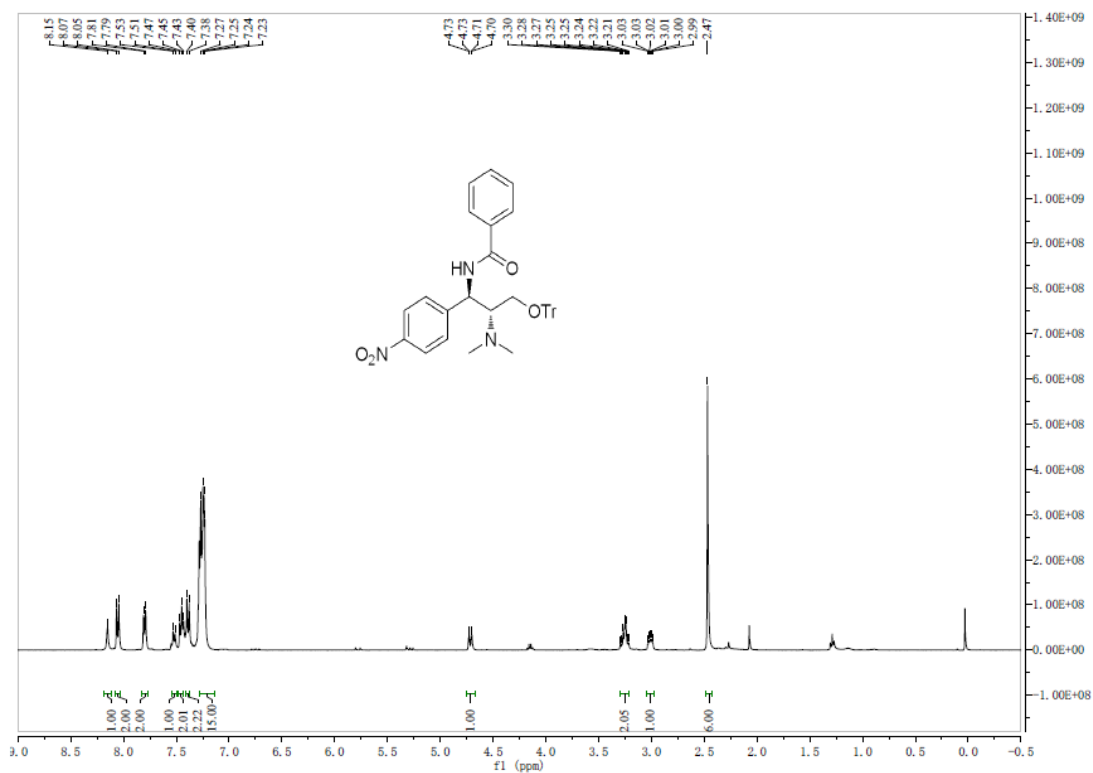

# <sup>13</sup>C NMR

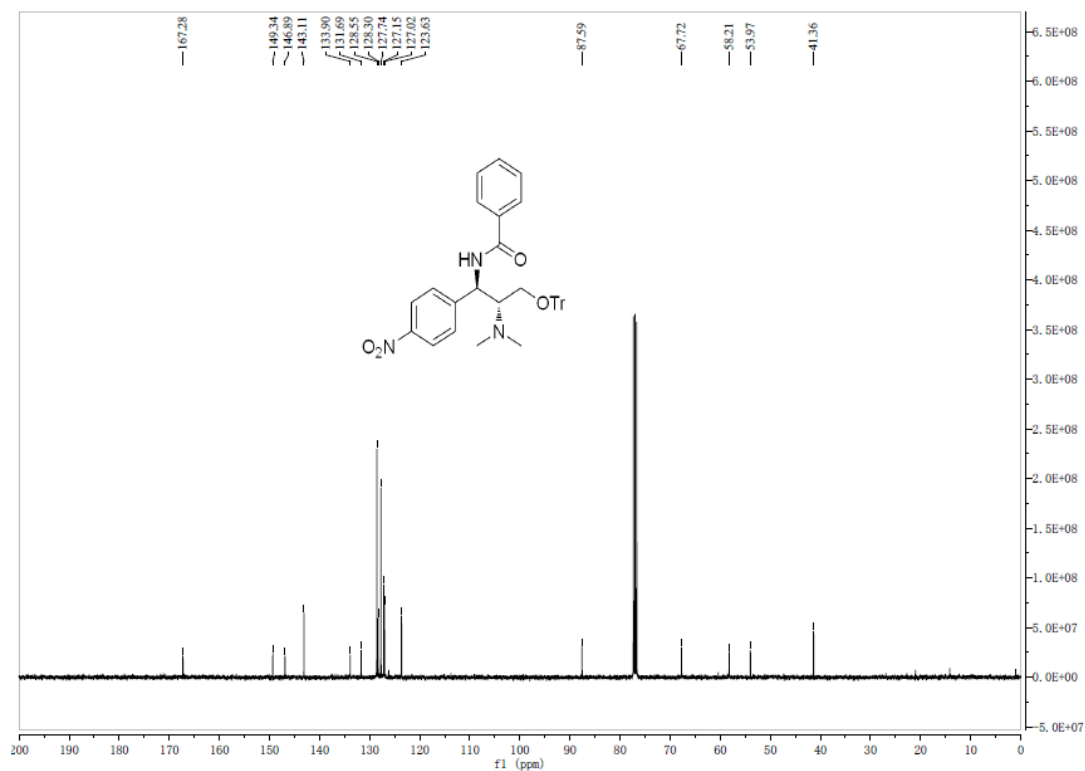

# HRMS

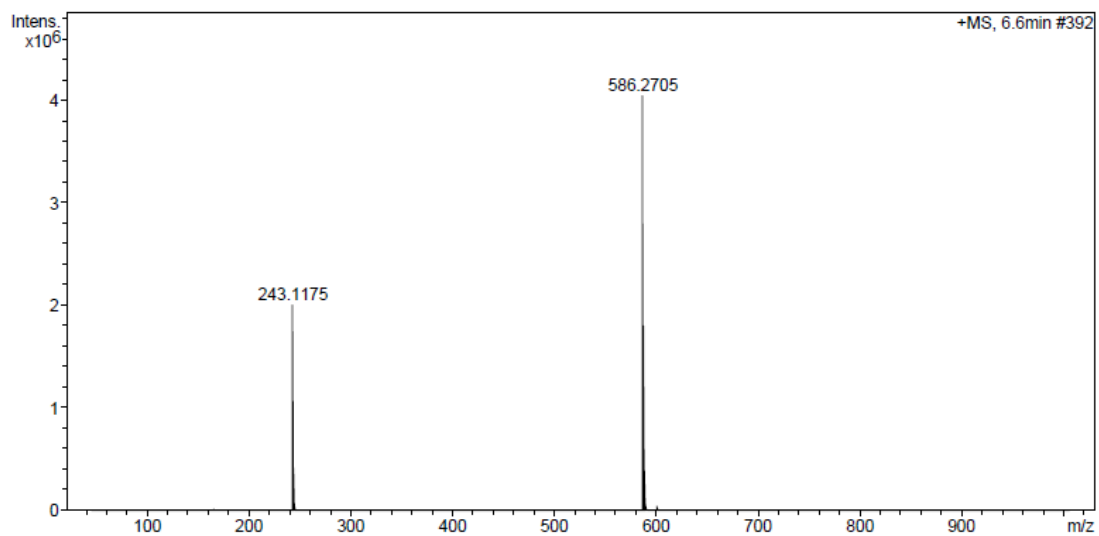



***N*-((1*R*,2*R*)-2-(Dimethylamino)-1-(4-nitrophenyl)-3-(trityloxy)propyl)-4-methylbenzamide (7g)**

<sup>1</sup>H NMR

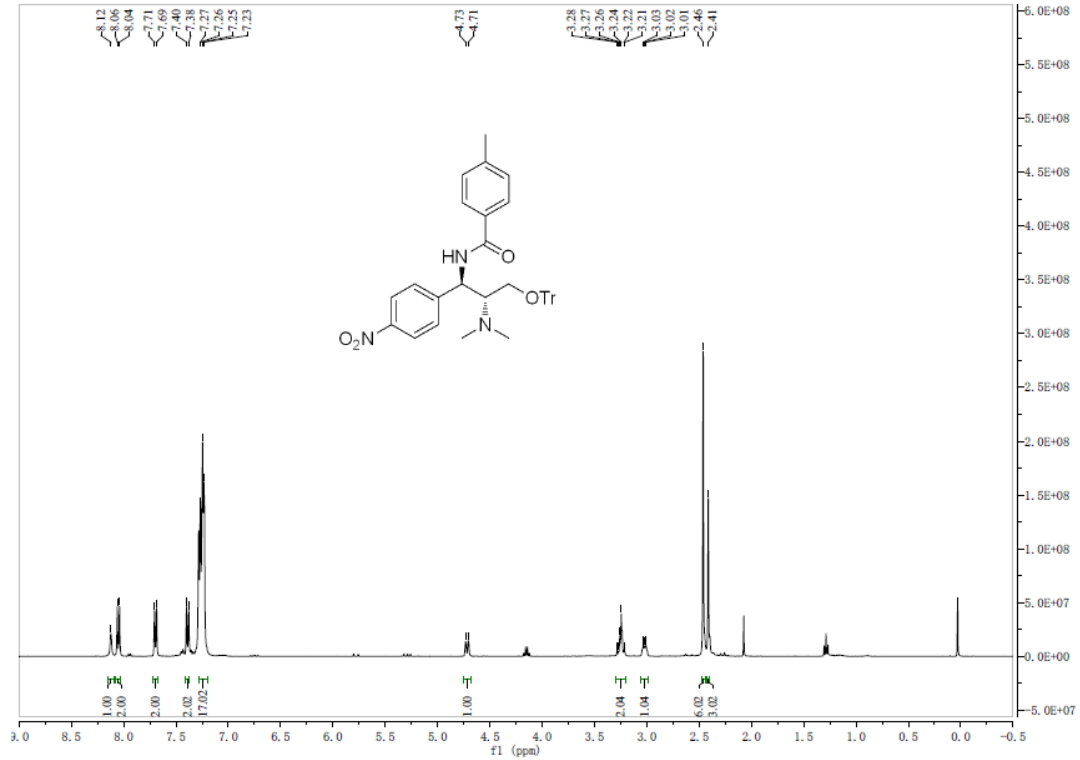

<sup>13</sup>C NMR

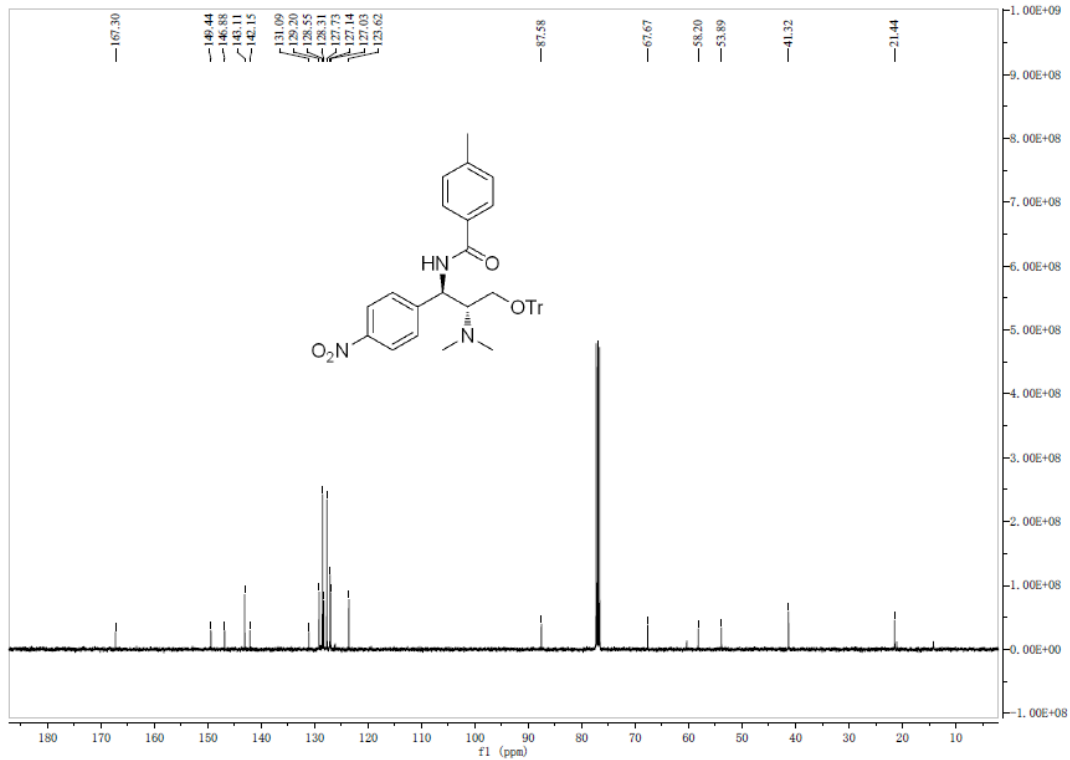

## HRMS

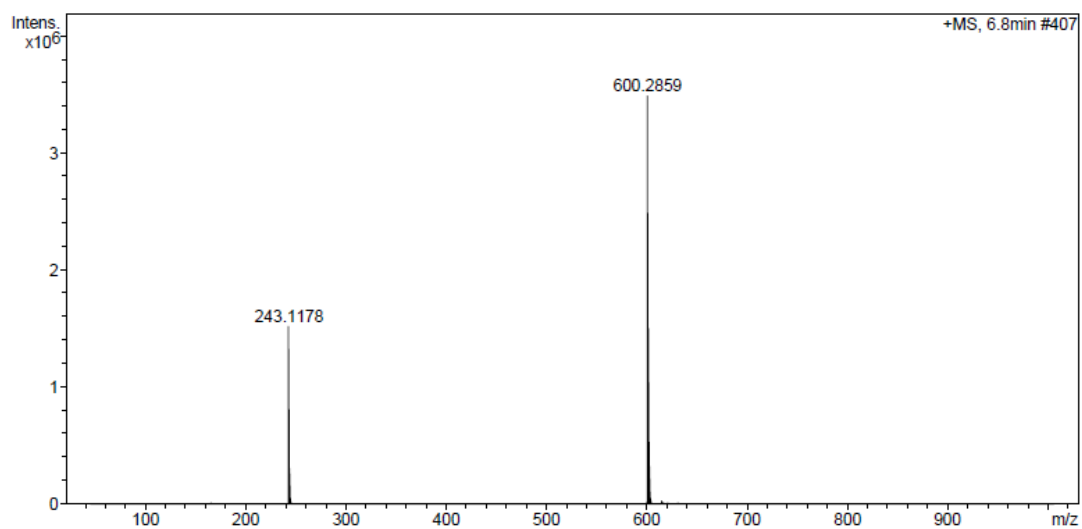

## *N*-((1*R*,2*R*)-2-(Dimethylamino)-1-(4-nitrophenyl)-3-(trityloxy)propyl)-4-methoxybenzamide (7h)

### <sup>1</sup>H NMR

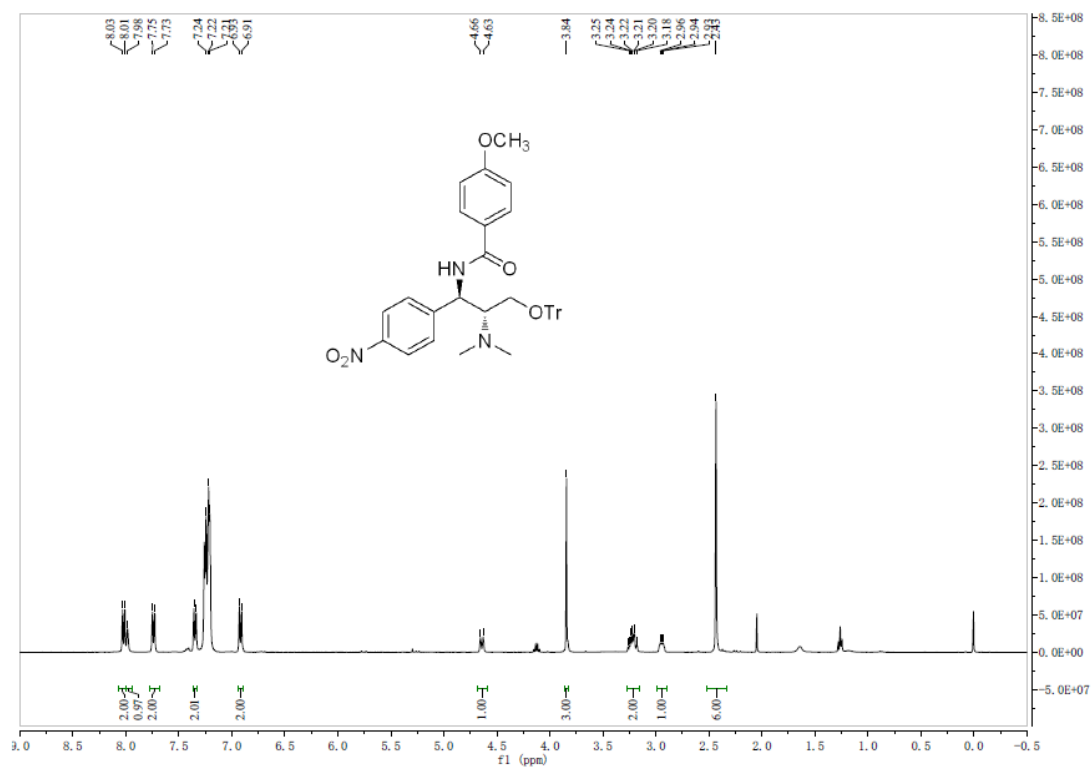

# <sup>13</sup>C NMR

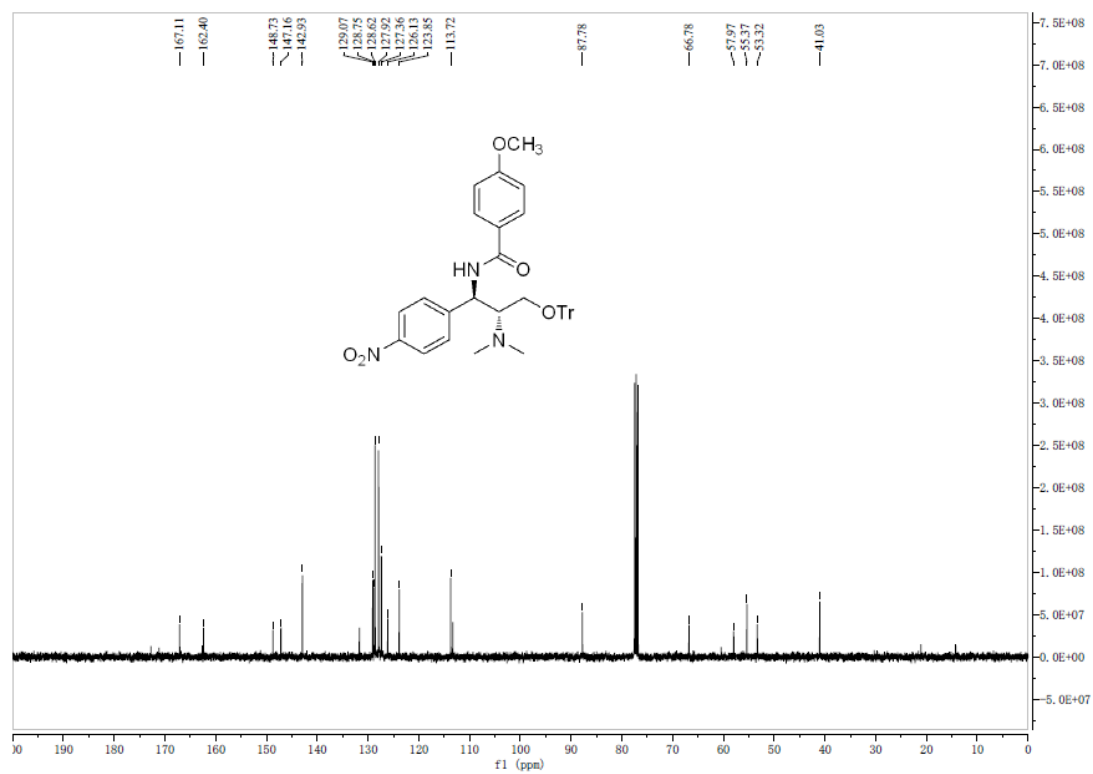

# HRMS

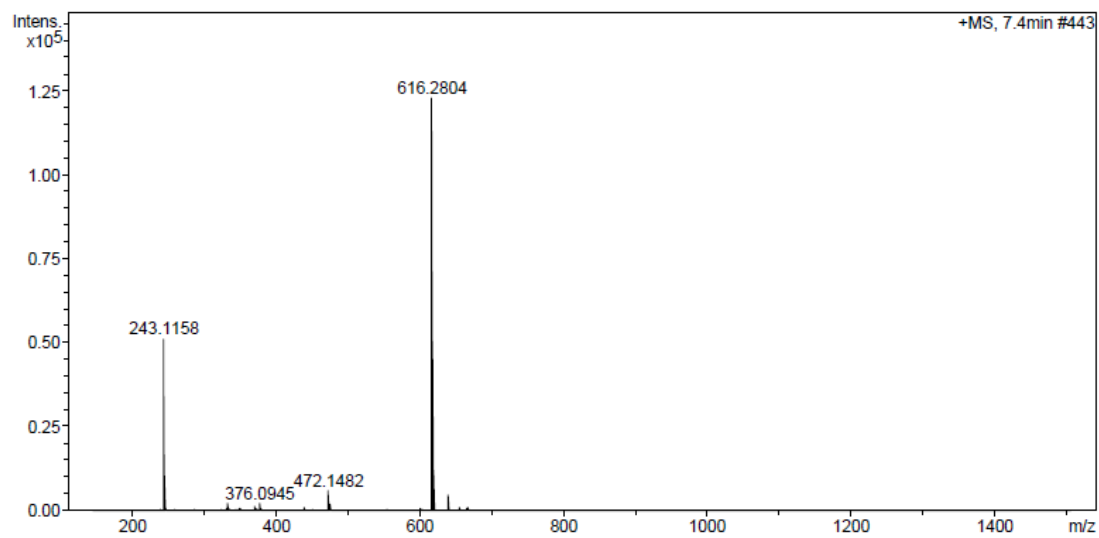

***N*-((1*R*,2*R*)-2-(Dimethylamino)-1-(4-nitrophenyl)-3-(trityloxy)propyl)-3,5-bis(trifluoromethyl)benzamide (7i)**

<sup>1</sup>H NMR

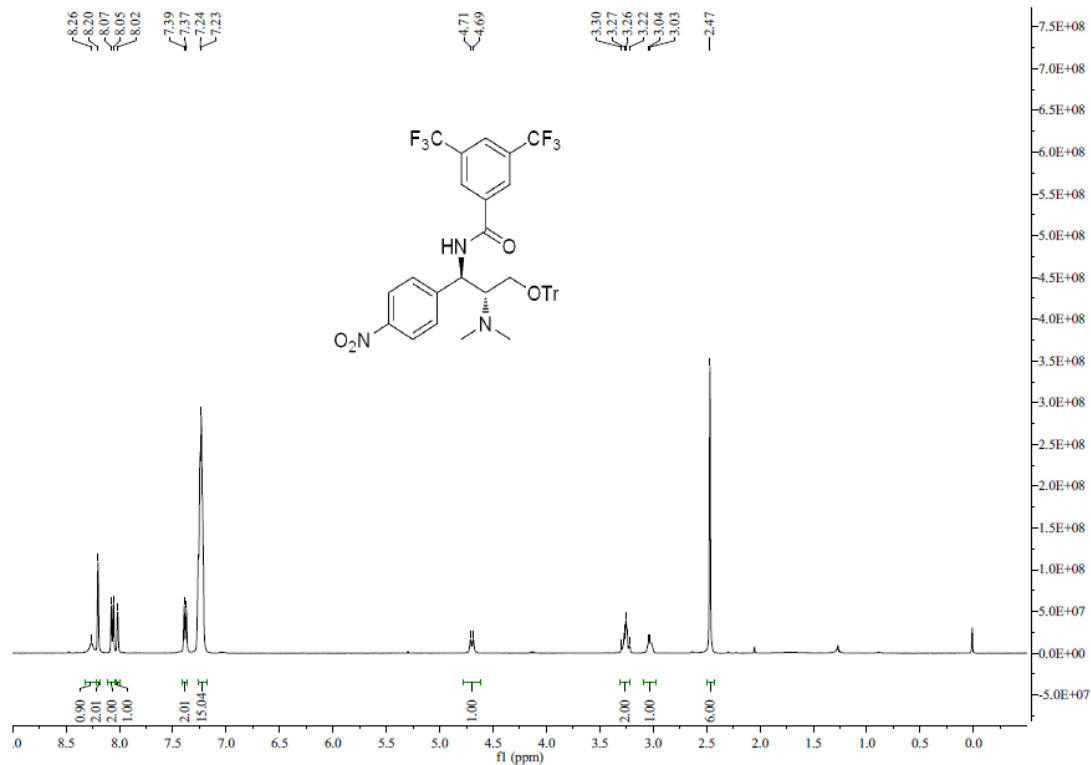

<sup>13</sup>C NMR

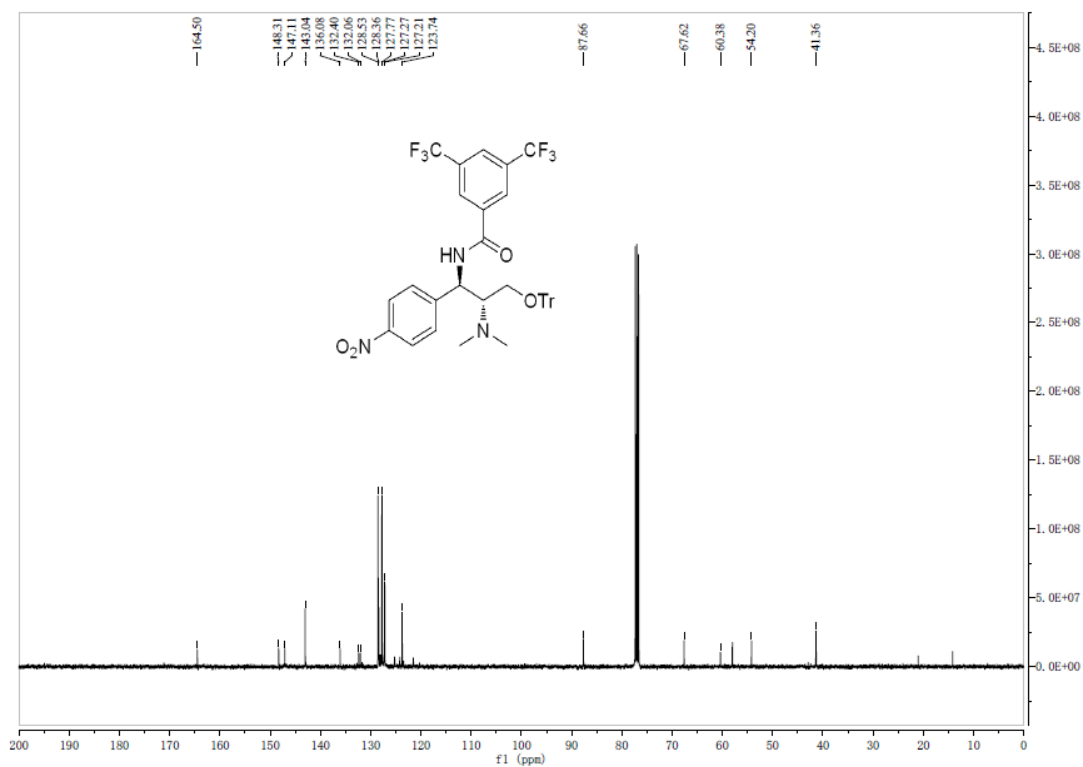

## HRMS

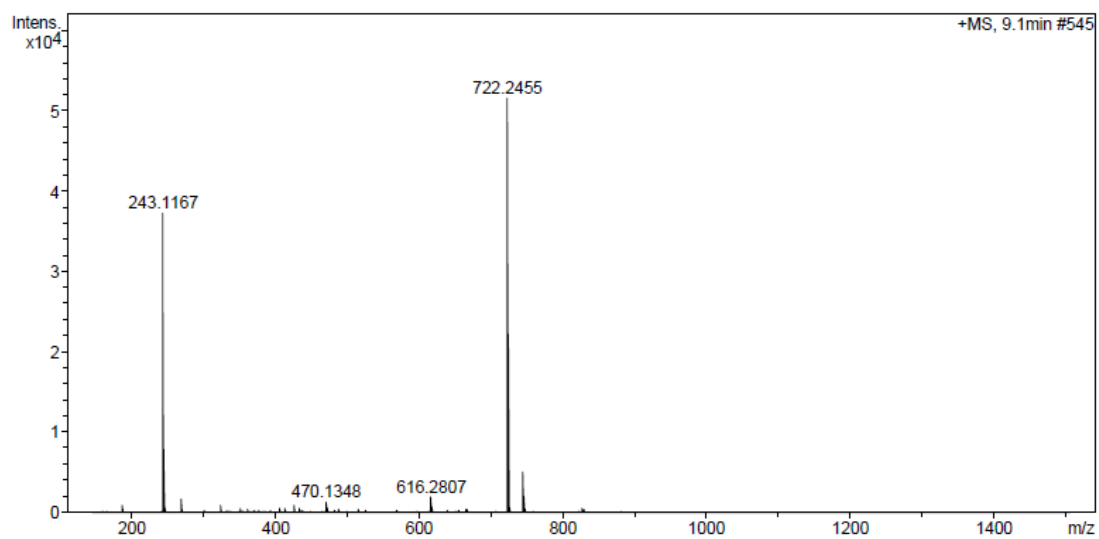

## *N*-((1*R*,2*R*)-1-(4-Nitrophenyl)-2-(pyrrolidin-1-yl)-3-(trityloxy)propyl)-3,5-bis-(trifluoromethyl)benzamide (7j)

### <sup>1</sup>H NMR

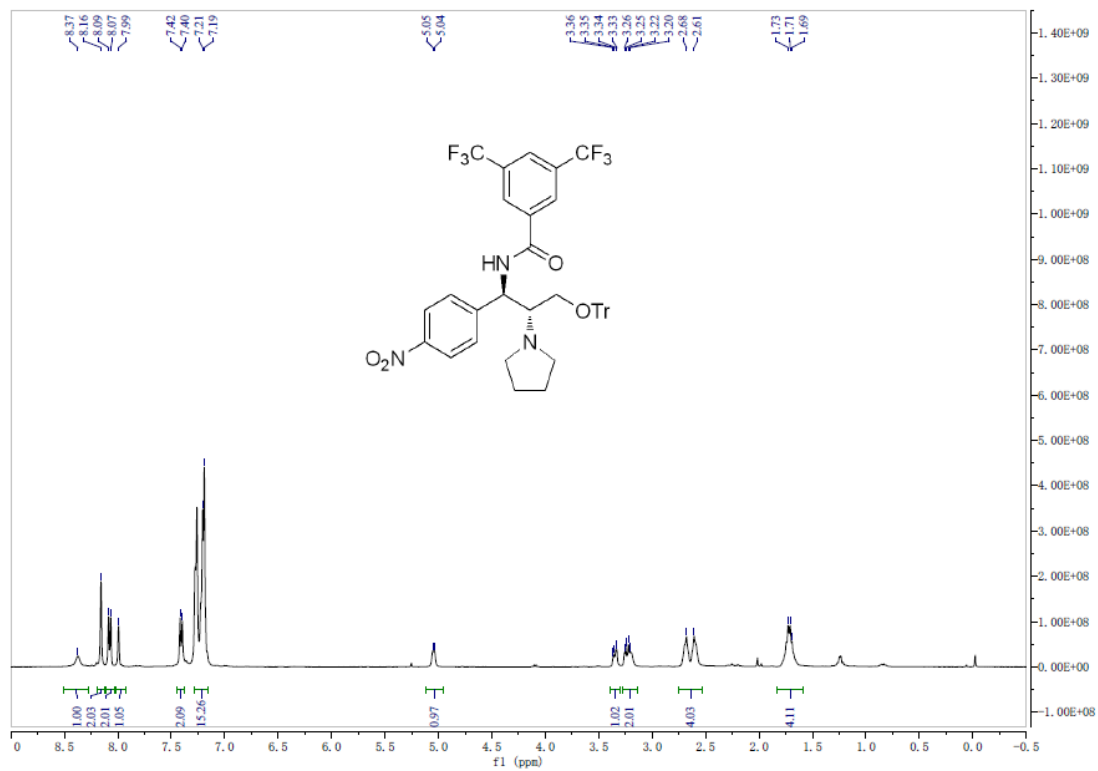

# <sup>13</sup>C NMR

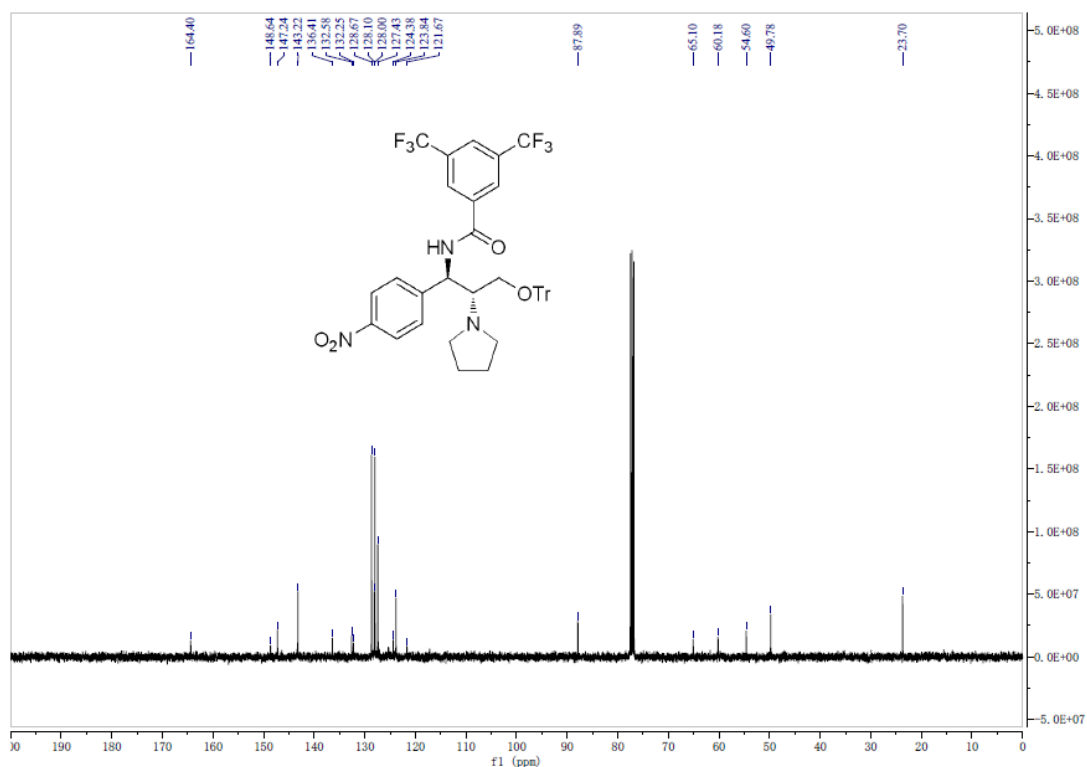

# HRMS

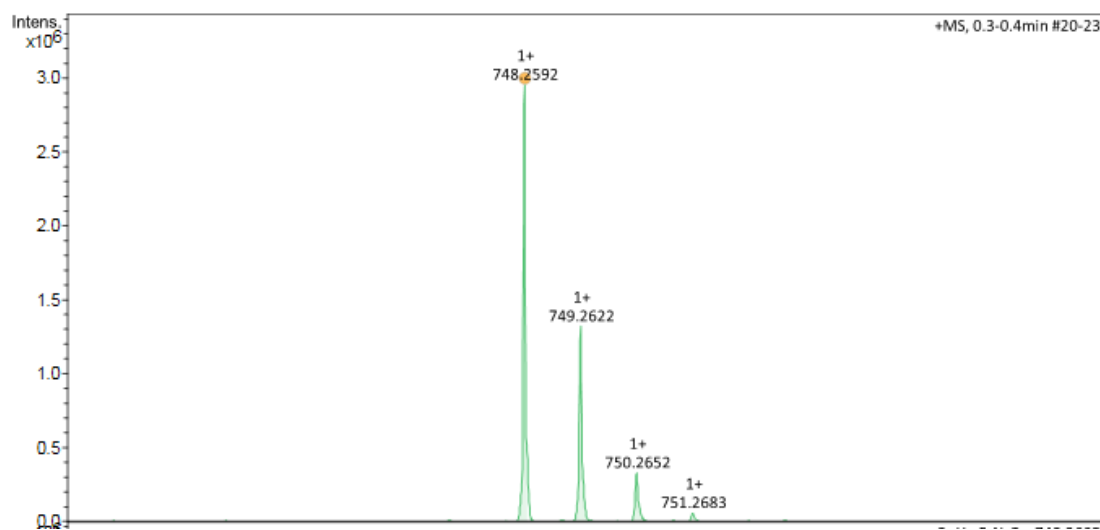

***N*-((1*R*,2*R*)-1-(4-Nitrophenyl)-2-(piperidin-1-yl)-3-(trityloxy)propyl)-3,5-bis(trifluoromethyl)benzamide (7k)**

<sup>1</sup>H NMR

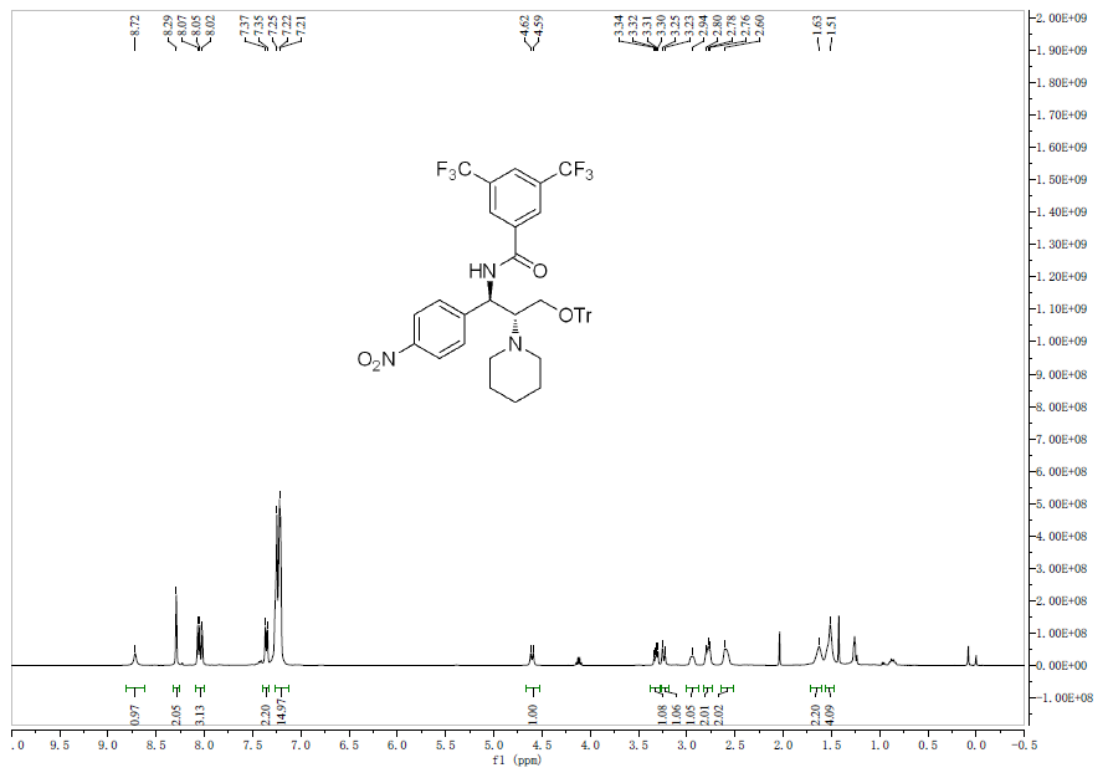

<sup>13</sup>C NMR

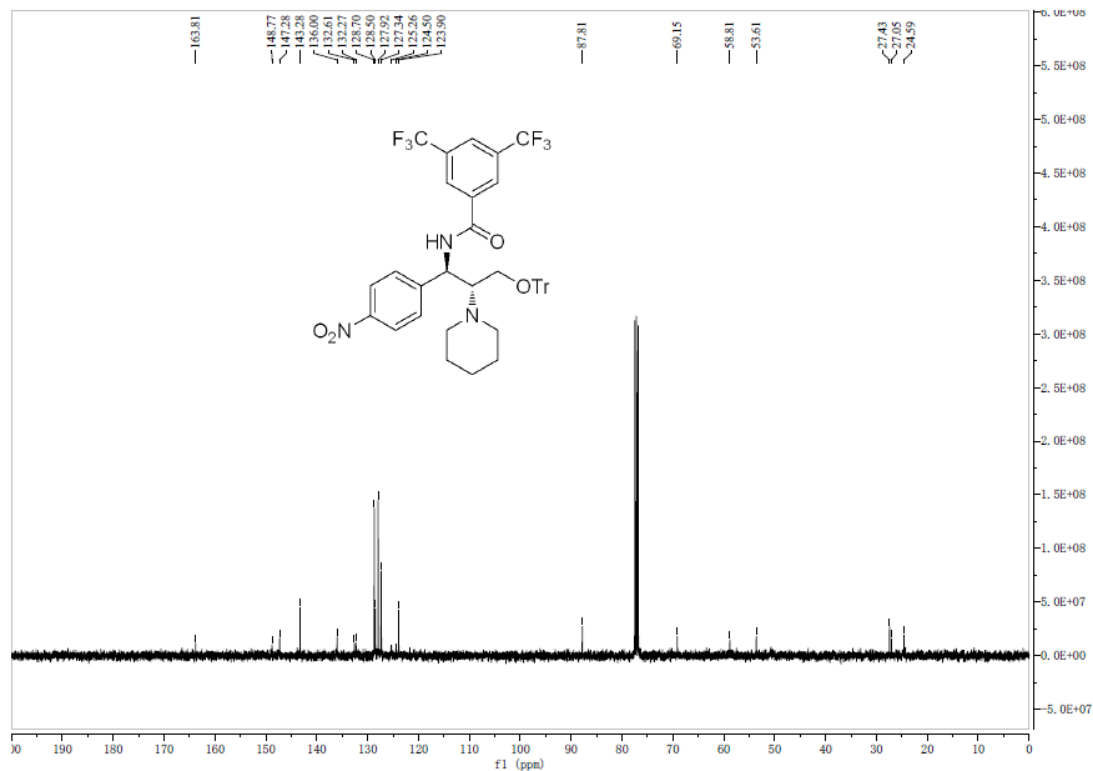

## HRMS

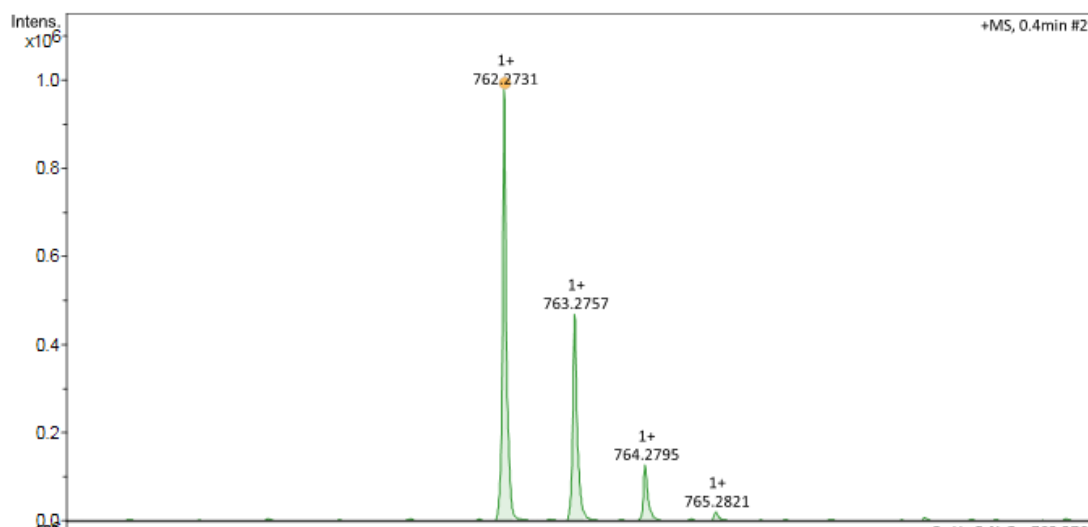

## *N*-((1*R*,2*R*)-2-Morpholino-1-(4-nitrophenyl)-3-(trityloxy)propyl)-3,5-bis(trifluoromethyl)benzamide (71)

### <sup>1</sup>H NMR

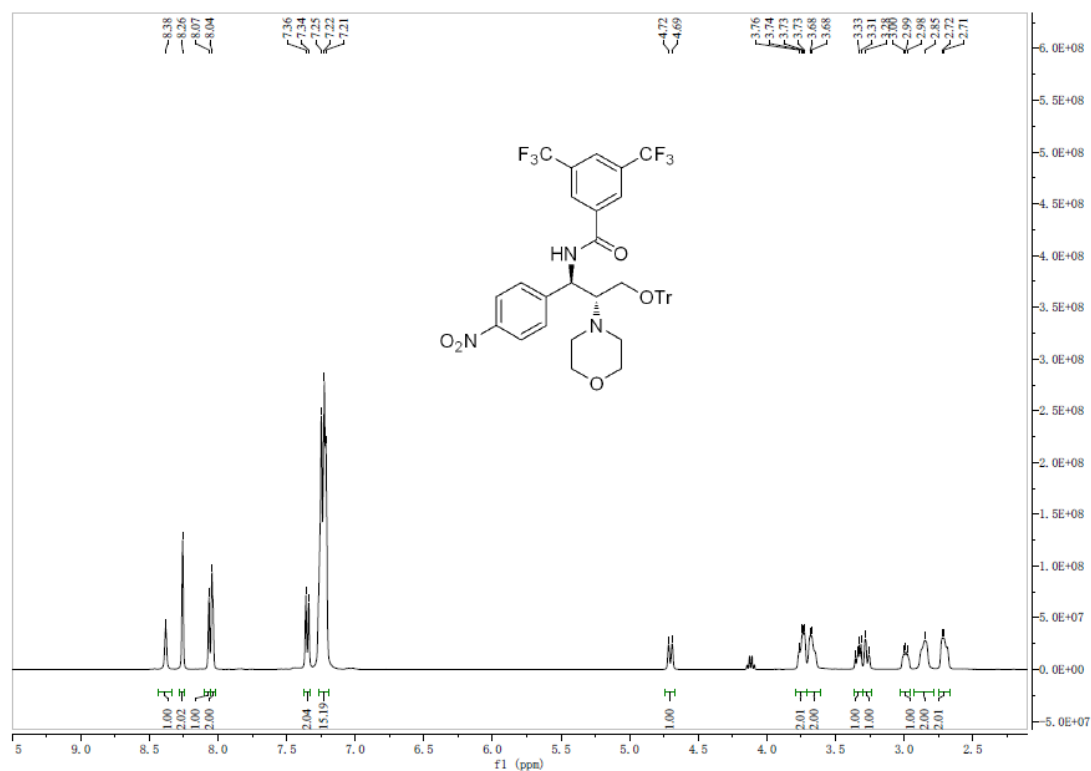



# <sup>13</sup>C NMR

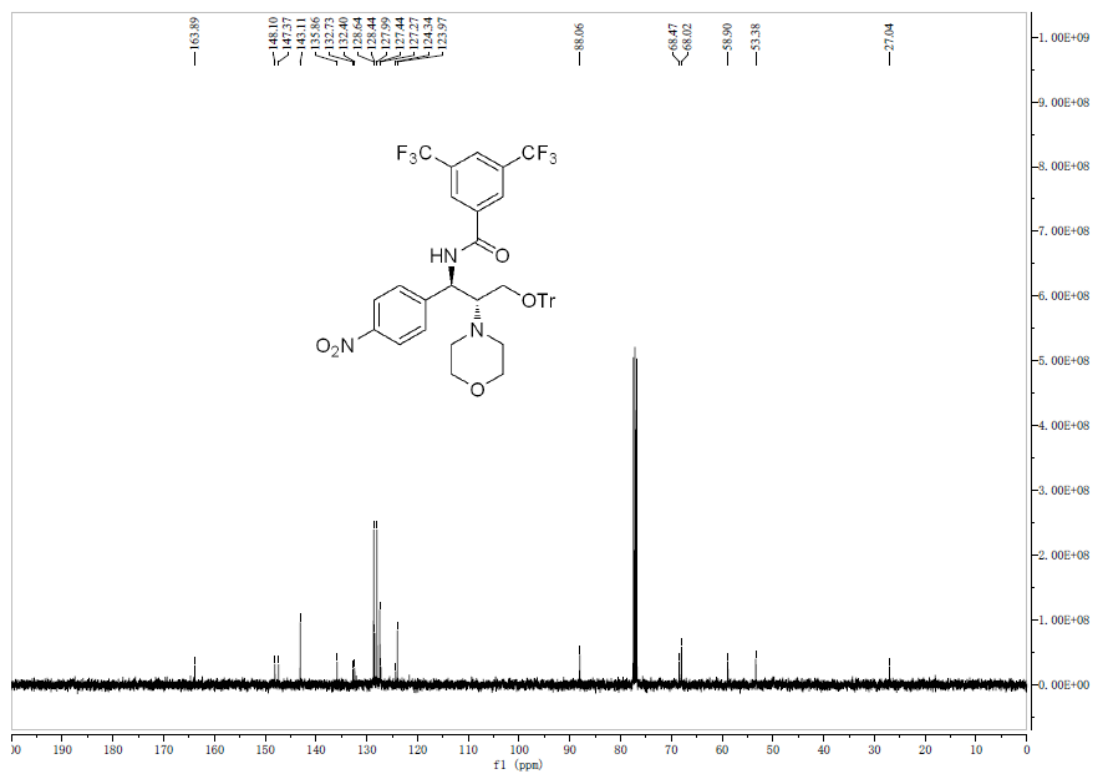

# HRMS

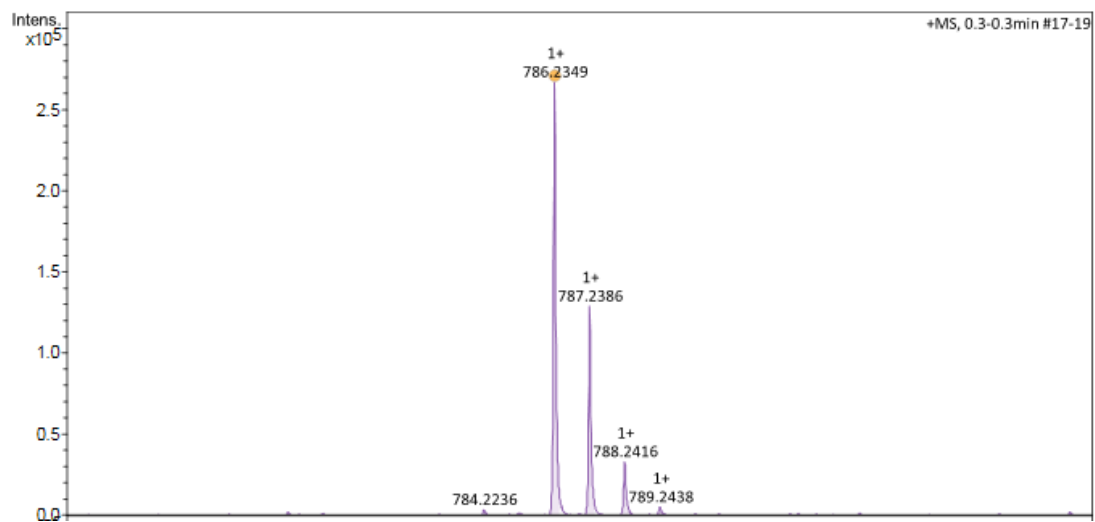

***N*-((1*R*,2*R*)-3-((*tert*-Butyldimethylsilyloxy)-2-(dimethylamino)-1-(4-nitrophenyl)-propyl)-3,5-bis(trifluoromethyl)benzamide (7m)**

<sup>1</sup>H NMR

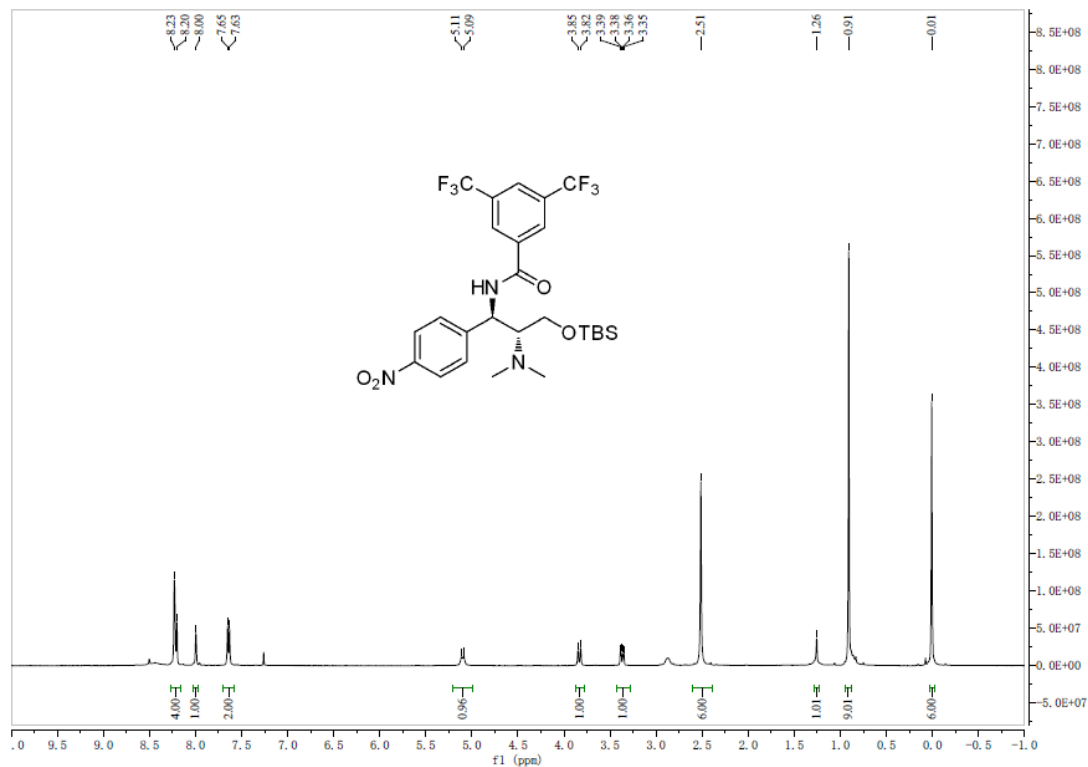

<sup>13</sup>C NMR

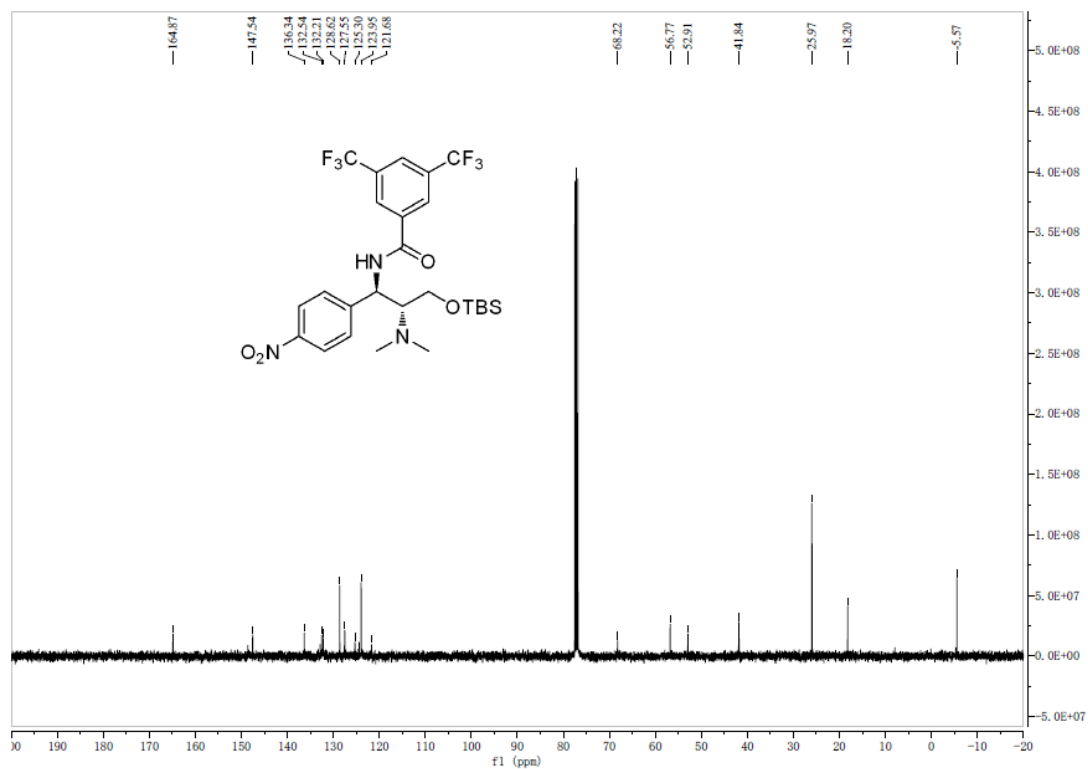

# HRMS

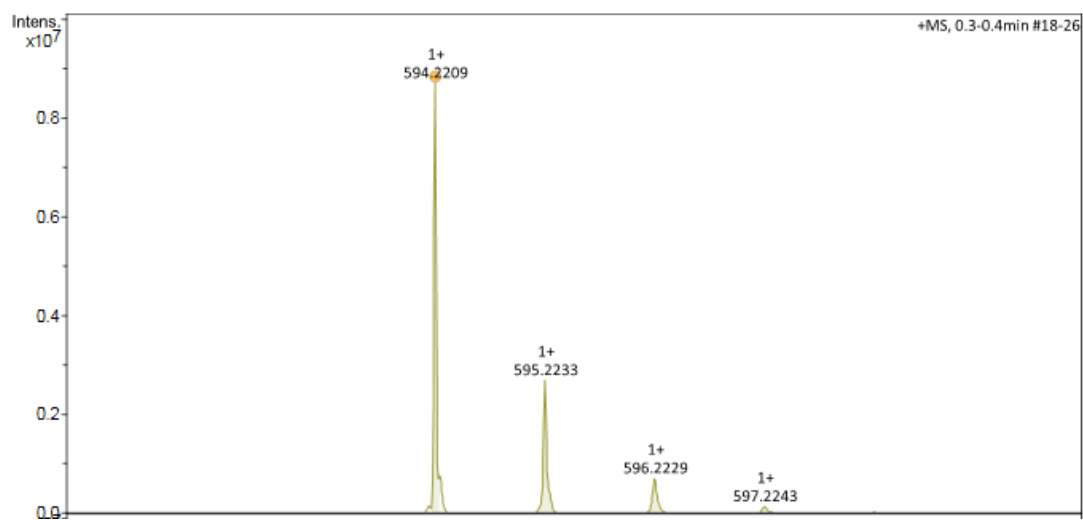

## *N*-((1*R*,2*R*)-3-((*tert*-Butyldimethylsilyloxy)-1-(4-nitrophenyl)-2-(pyrrolidin-1-yl)propyl)-3,5-bis(trifluoromethyl)benzamide (7n)

### <sup>1</sup>H NMR

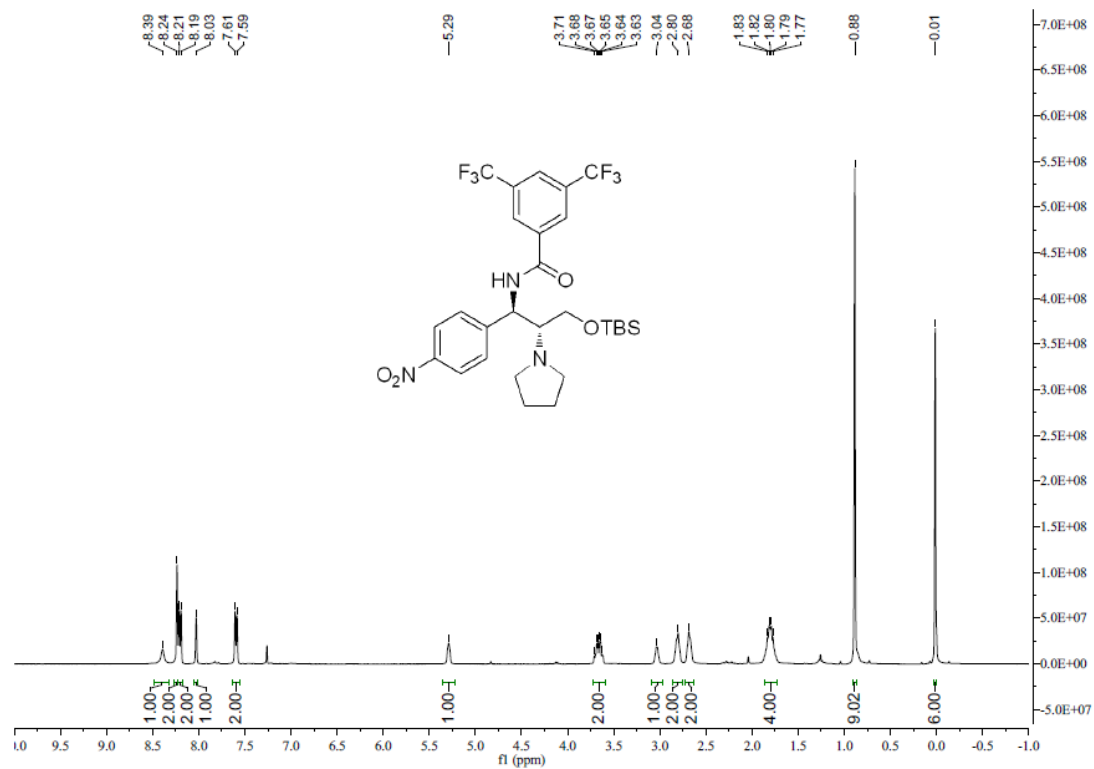

# <sup>13</sup>C NMR

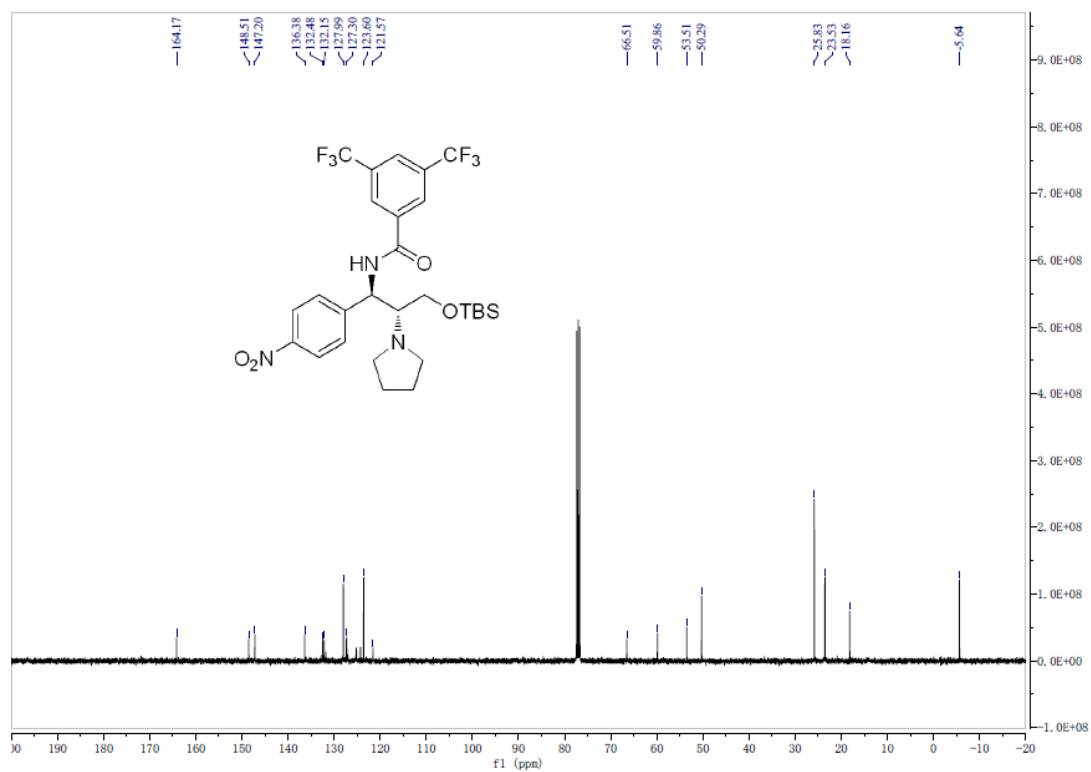

# HRMS

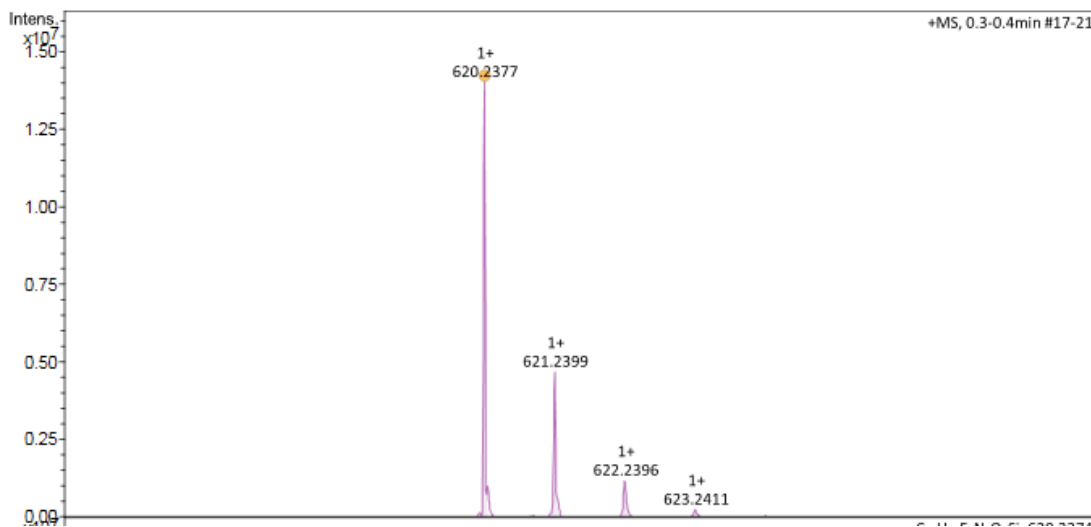

***N*-((1*R*,2*R*)-3-((*tert*-Butyldimethylsilyloxy)-1-(4-nitrophenyl)-2-(piperidin-1-yl)-propyl)-3,5-bis(trifluoromethyl)benzamide (7o)**

<sup>1</sup>H NMR

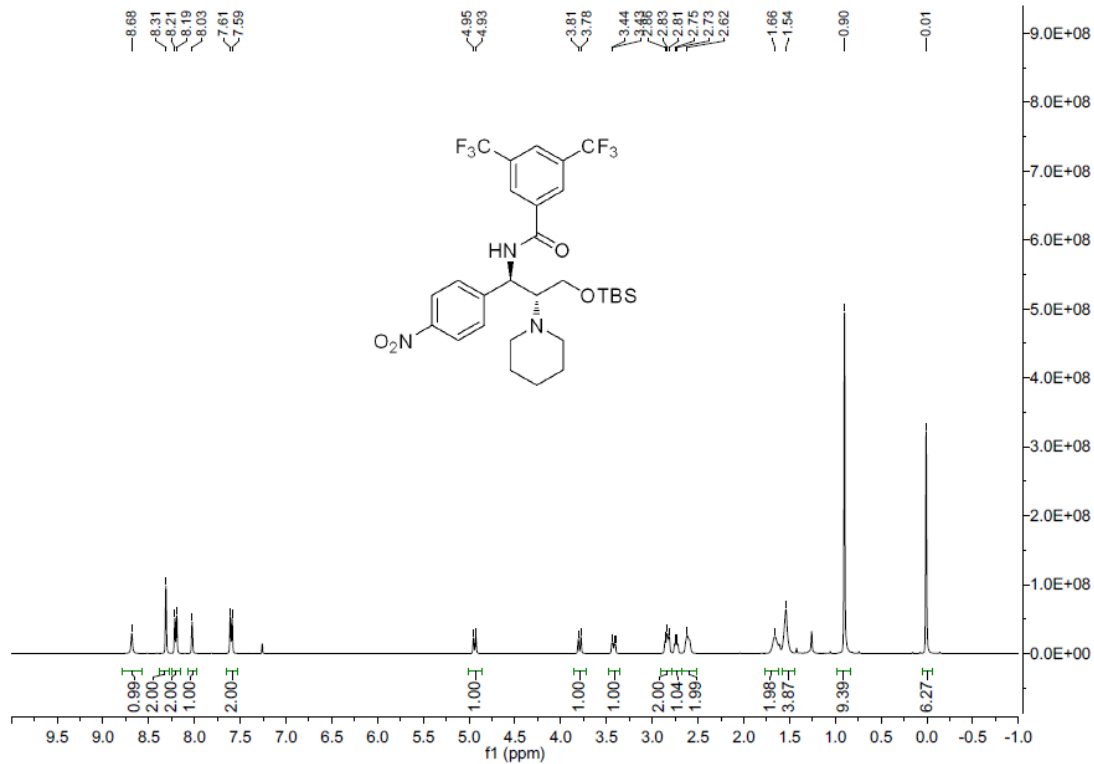

<sup>13</sup>C NMR

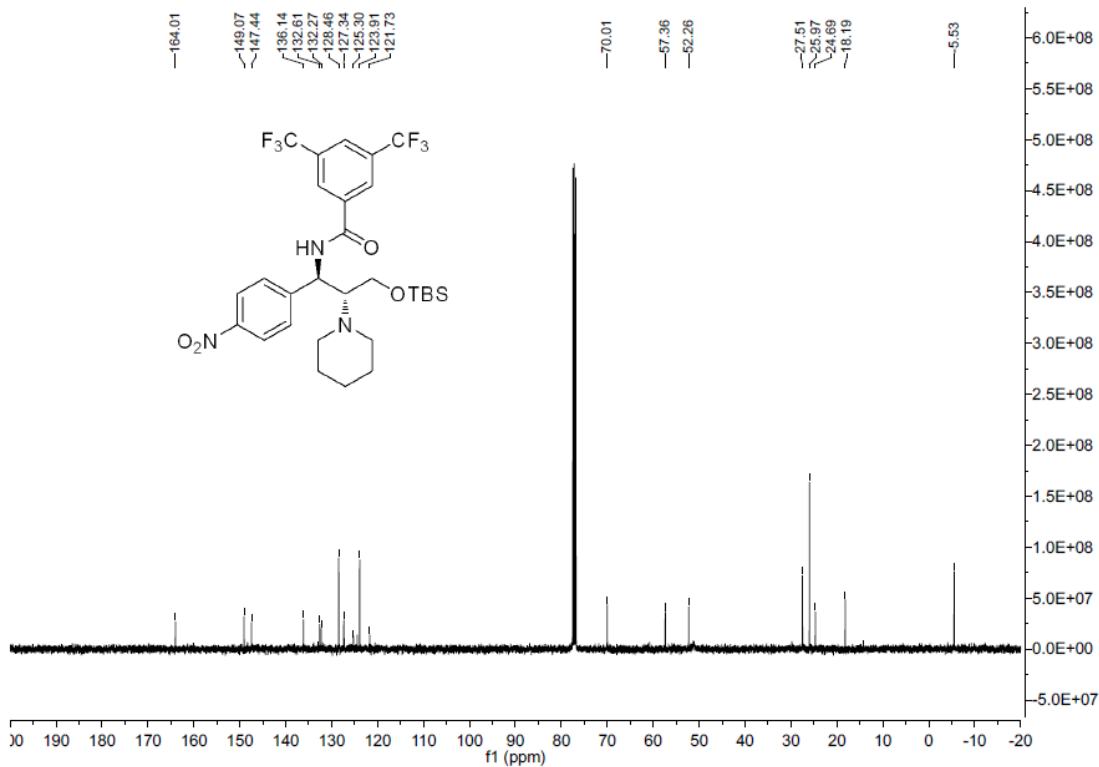

# HRMS

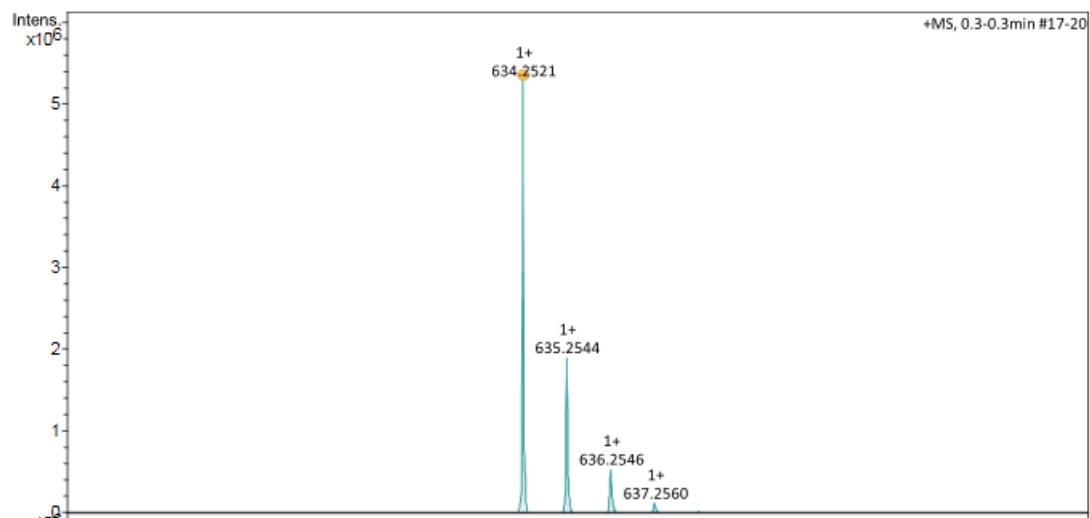

## *N*-((1*R*,2*R*)-3-((*tert*-Butyldimethylsilyloxy)-2-morpholino-1-(4-nitrophenyl)-propyl)-3,5-bis(trifluoromethyl)benzamide (7p)

### <sup>1</sup>H NMR

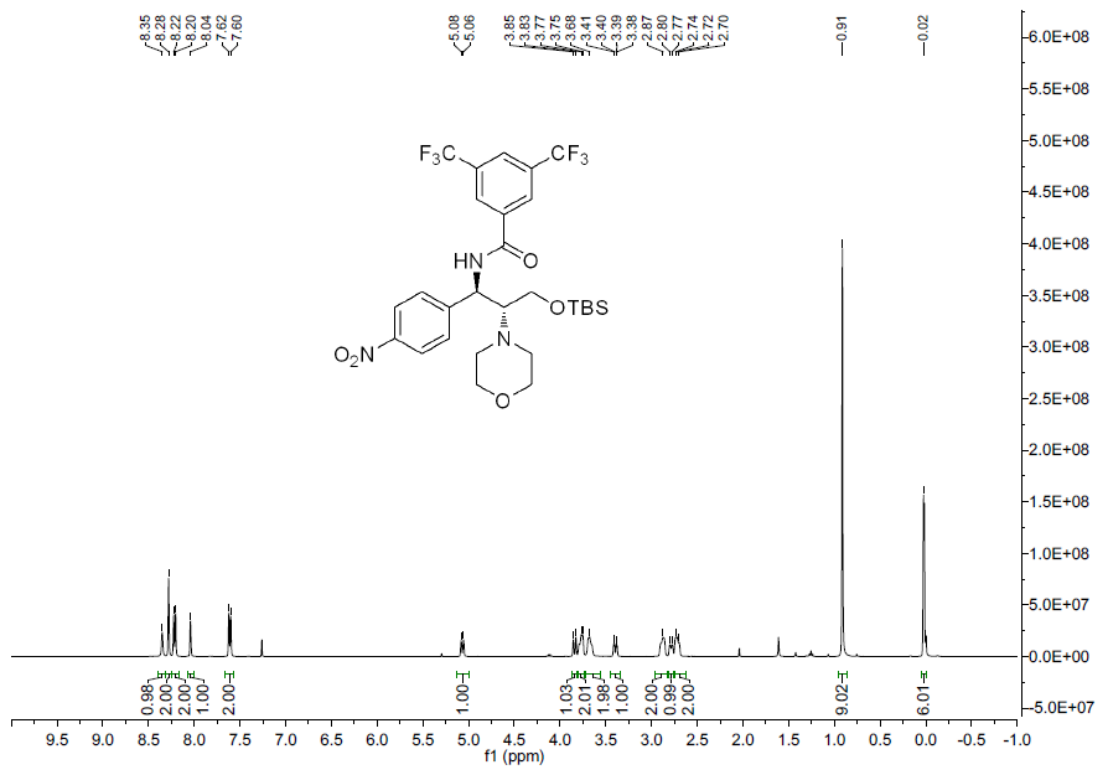

# <sup>13</sup>C NMR

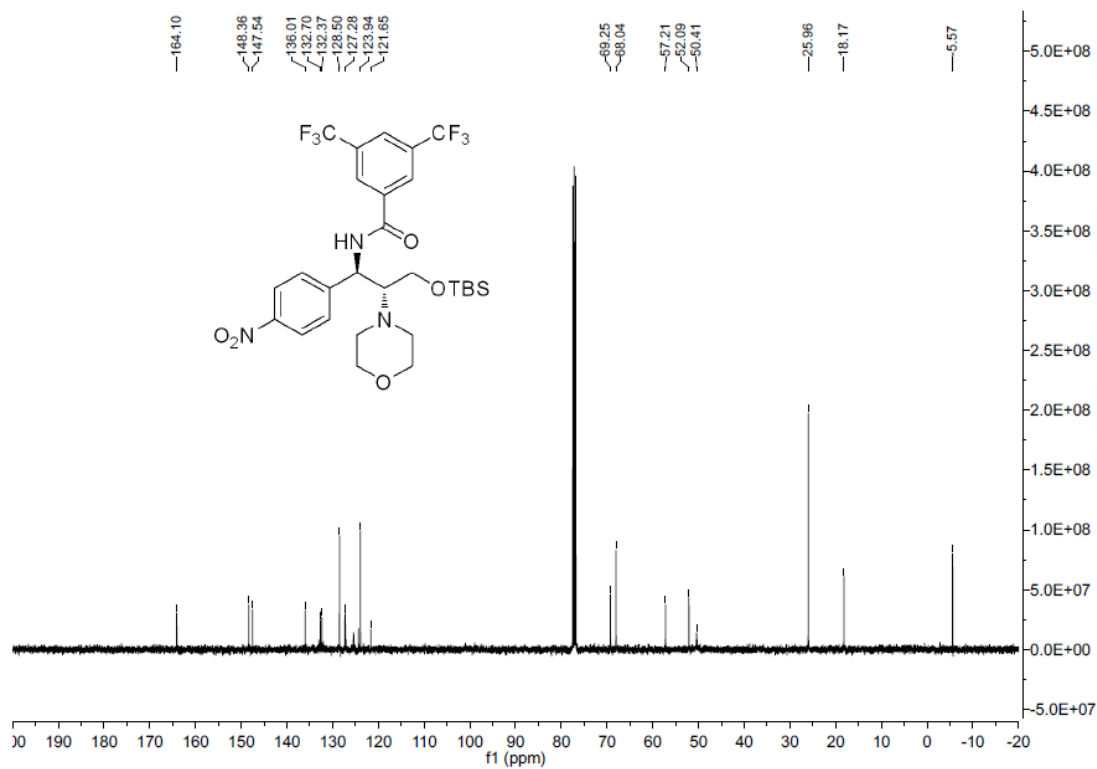

# HRMS

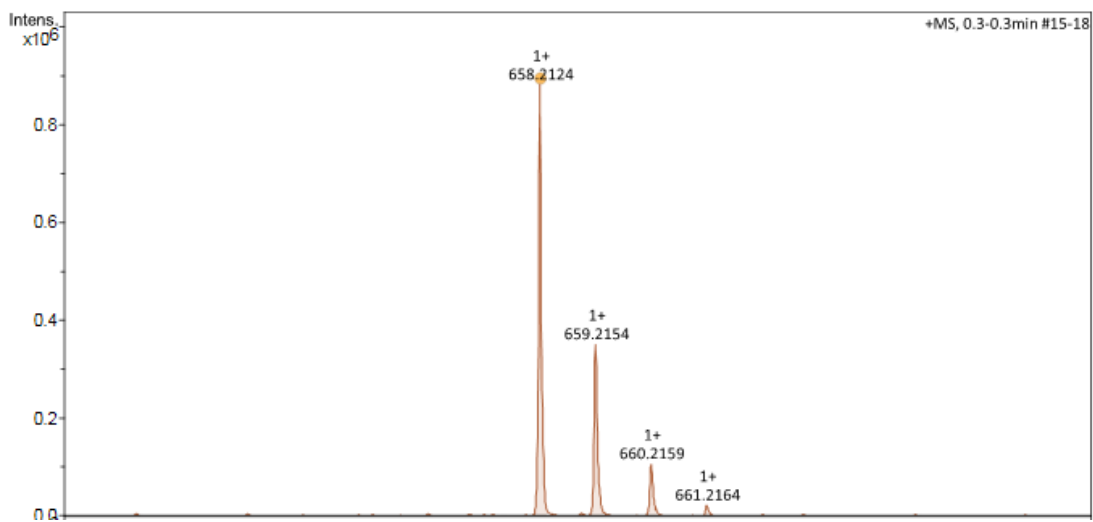

**(1*S*,6*R*)-6-(Methoxycarbonyl)cyclohex-3-enecarboxylic acid (9a)**

<sup>1</sup>H NMR

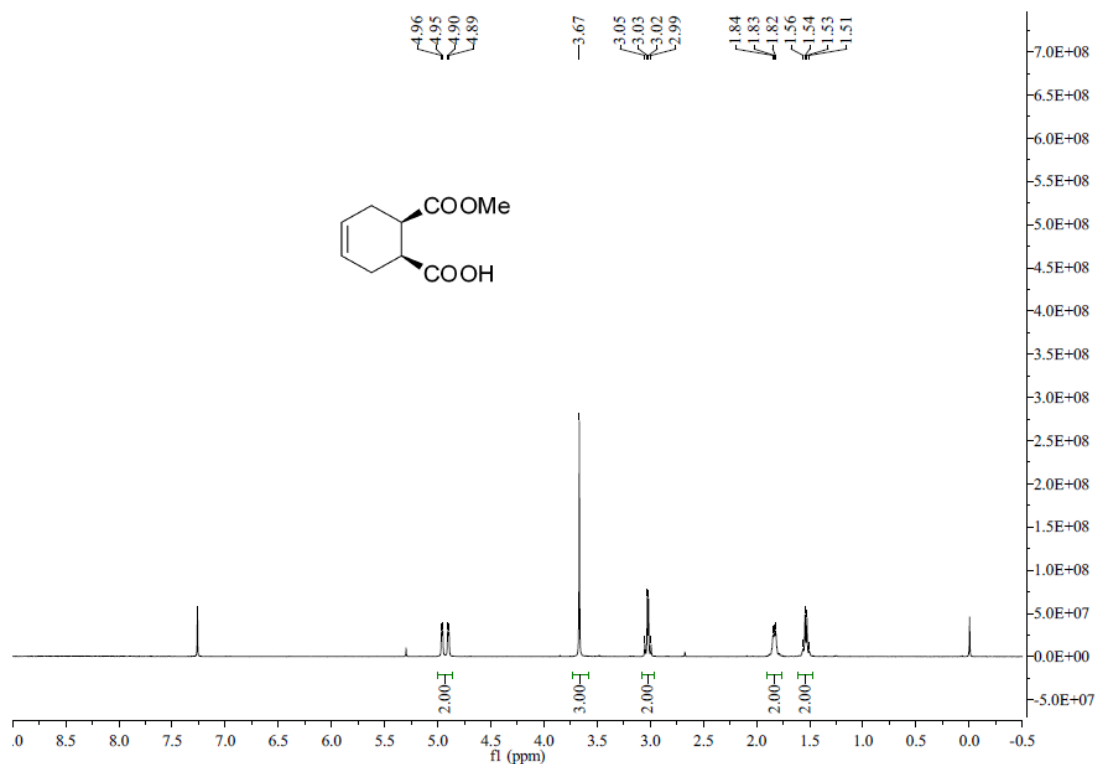

<sup>13</sup>C NMR

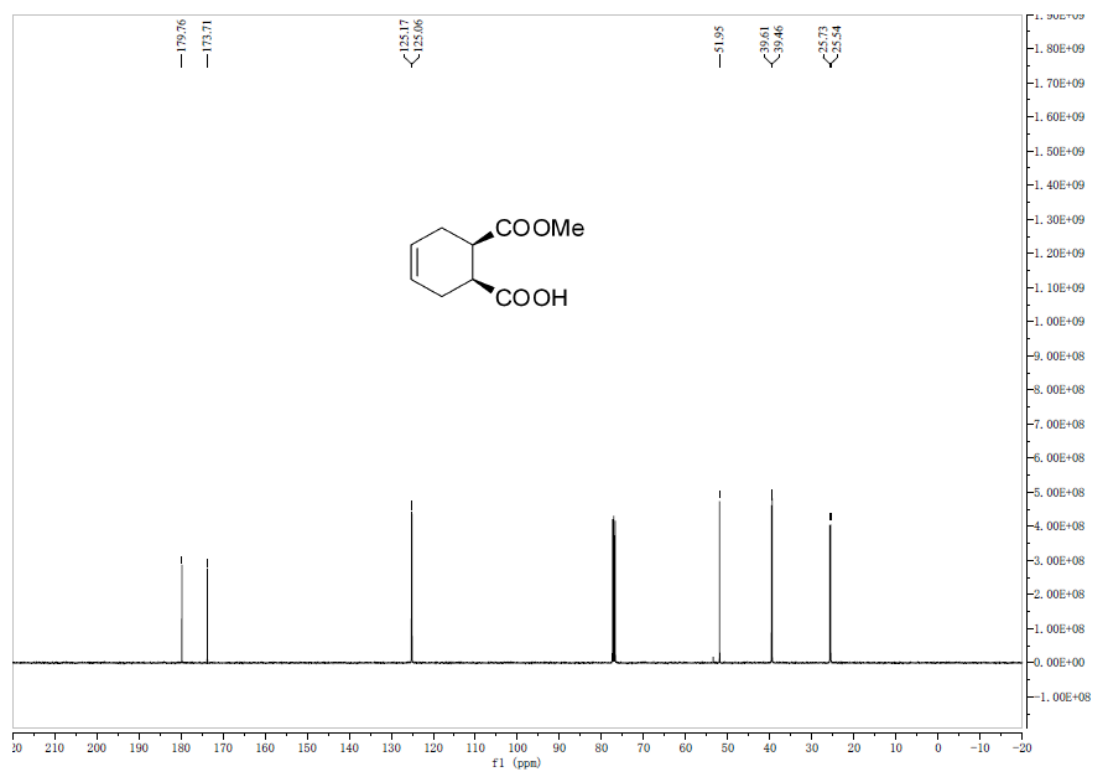



**(1*S*,2*R*)-2-(Methoxycarbonyl)cyclohexanecarboxylic acid (9b)**

<sup>1</sup>H NMR

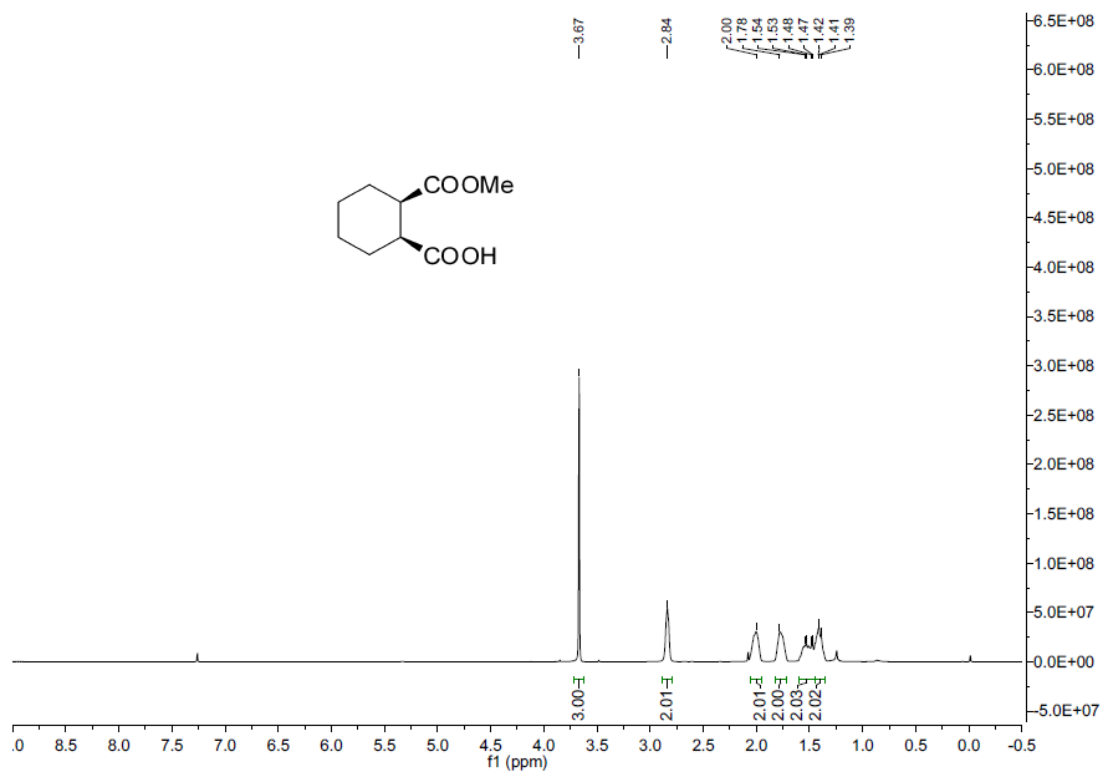

<sup>13</sup>C NMR

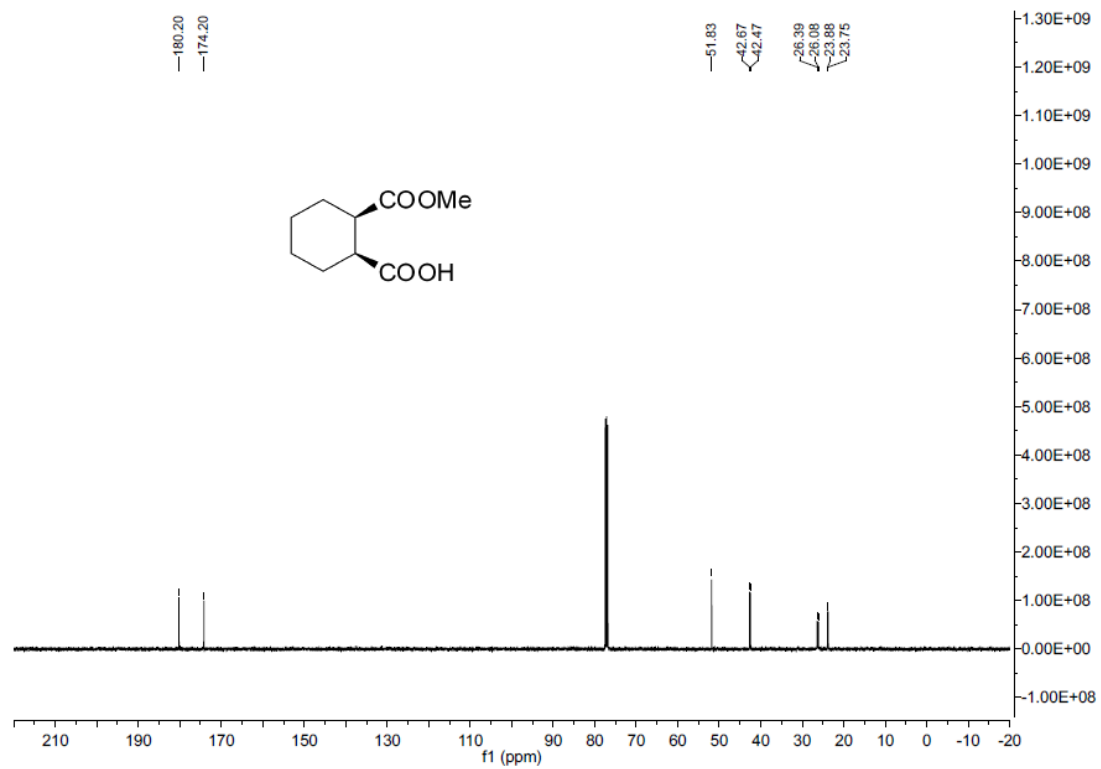

**(1*S*,2*R*,3*S*,4*R*)-3-(Methoxycarbonyl)-7-oxabicyclo[2.2.1]hept-5-ene-2-carboxylic acid (9c)**

<sup>1</sup>H NMR

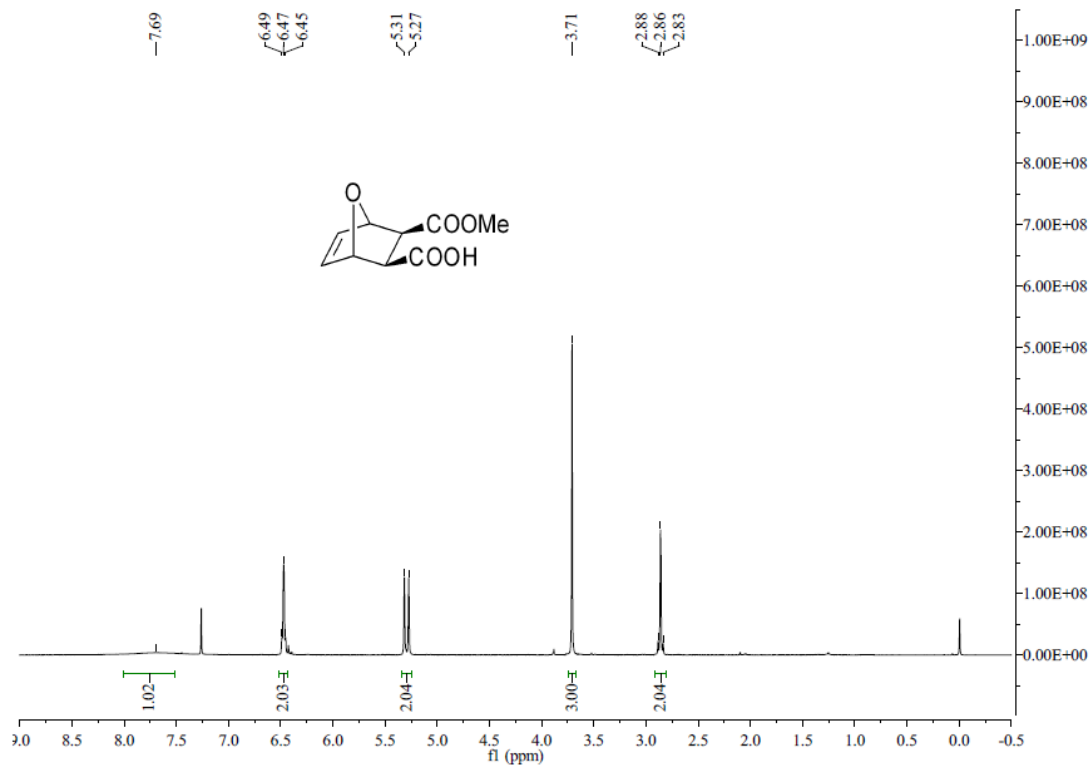

<sup>13</sup>C NMR

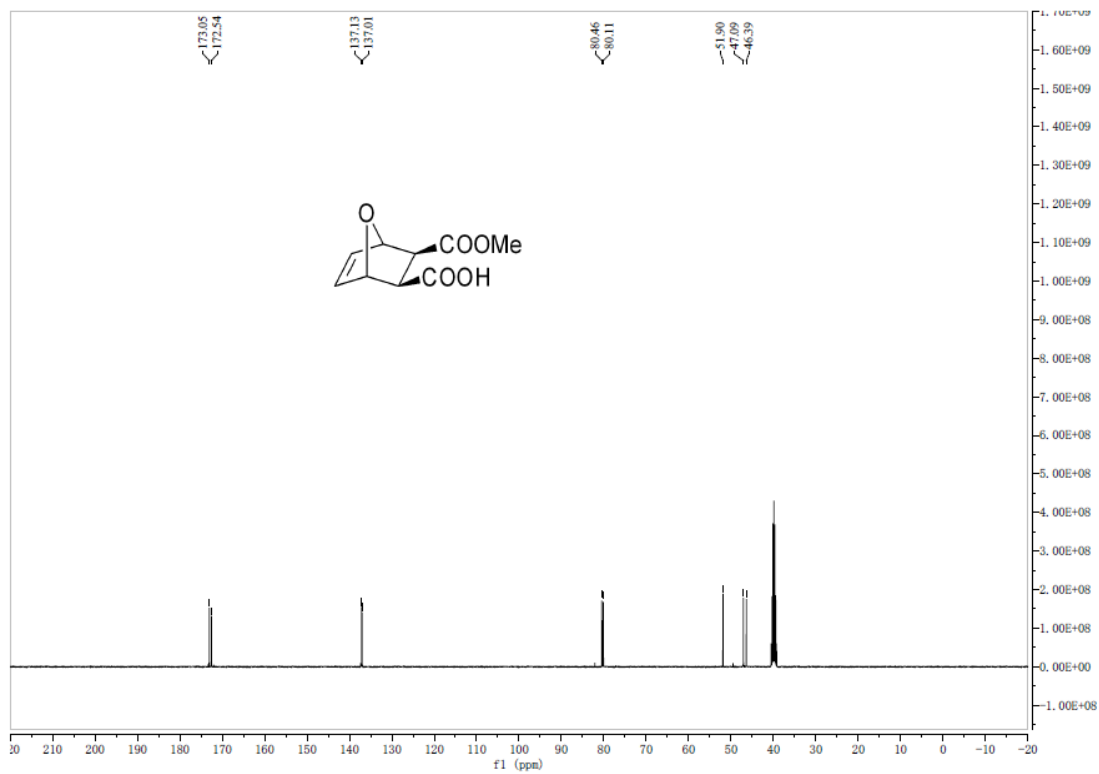

**(1*R*,2*S*,3*R*,4*S*)-3-(Methoxycarbonyl)bicyclo[2.2.1]hept-5-ene-2-carboxylic acid**

**(9d)**

<sup>1</sup>H NMR

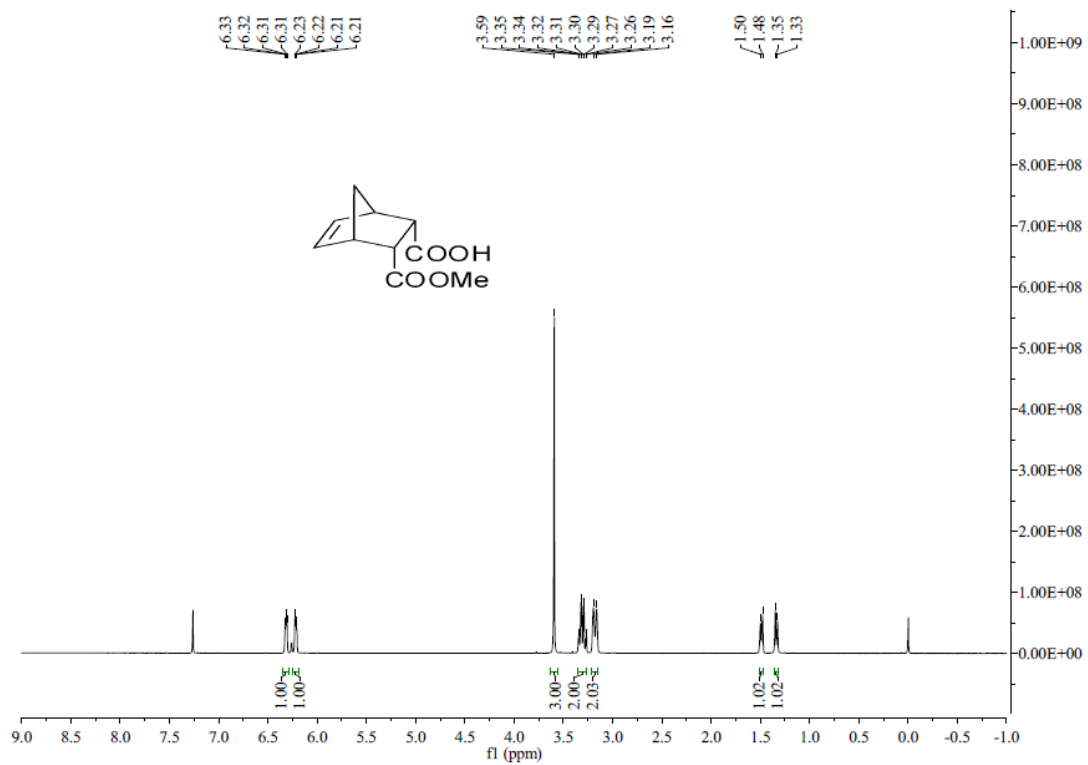

<sup>13</sup>C NMR

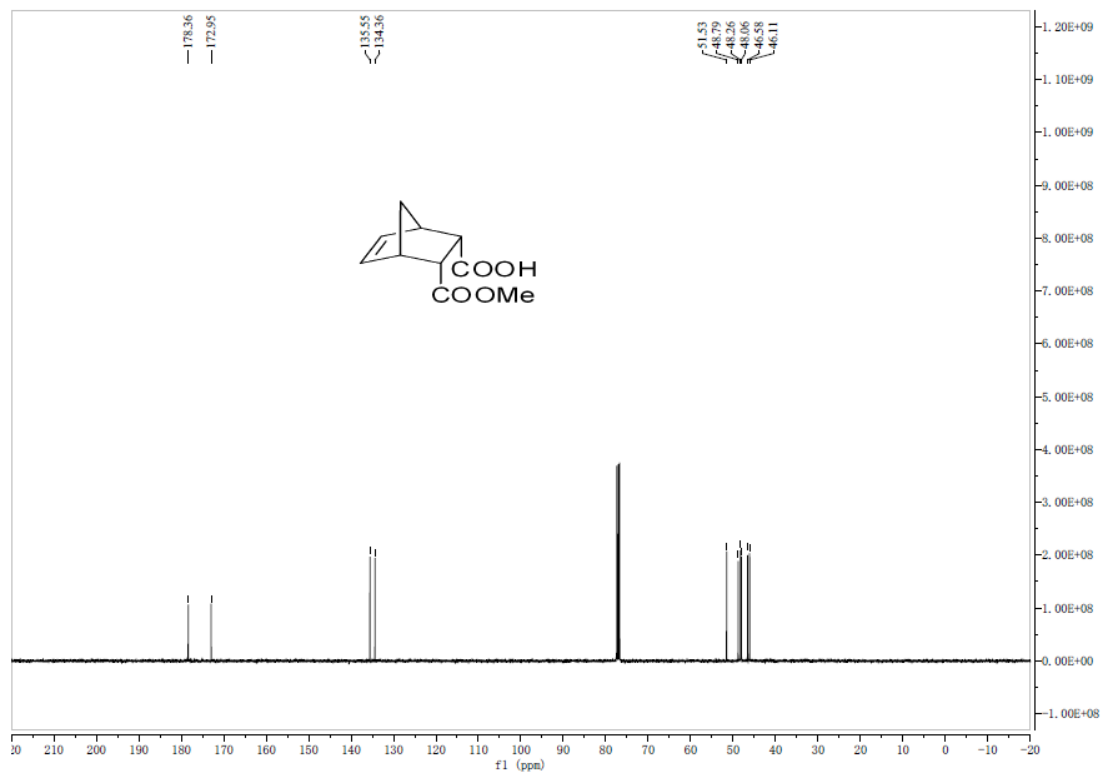

**(R)-5-Methoxy-3-methyl-5-oxopentanoic acid (9e)**

<sup>1</sup>H NMR

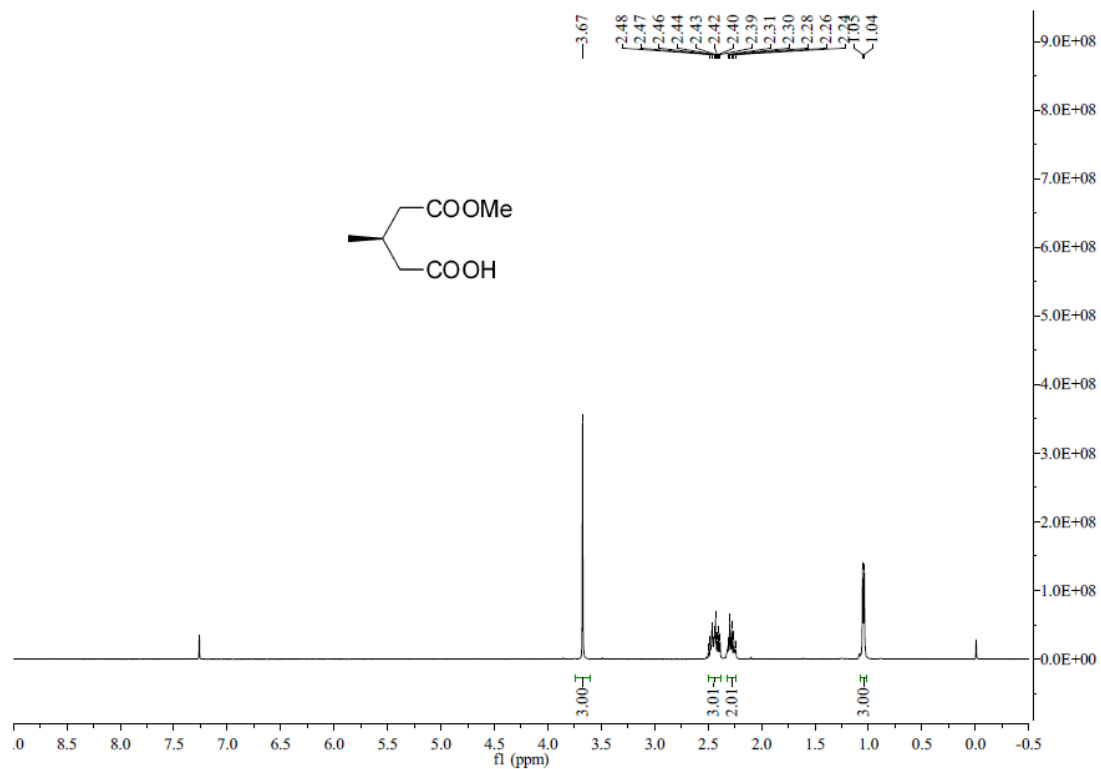

<sup>13</sup>C NMR

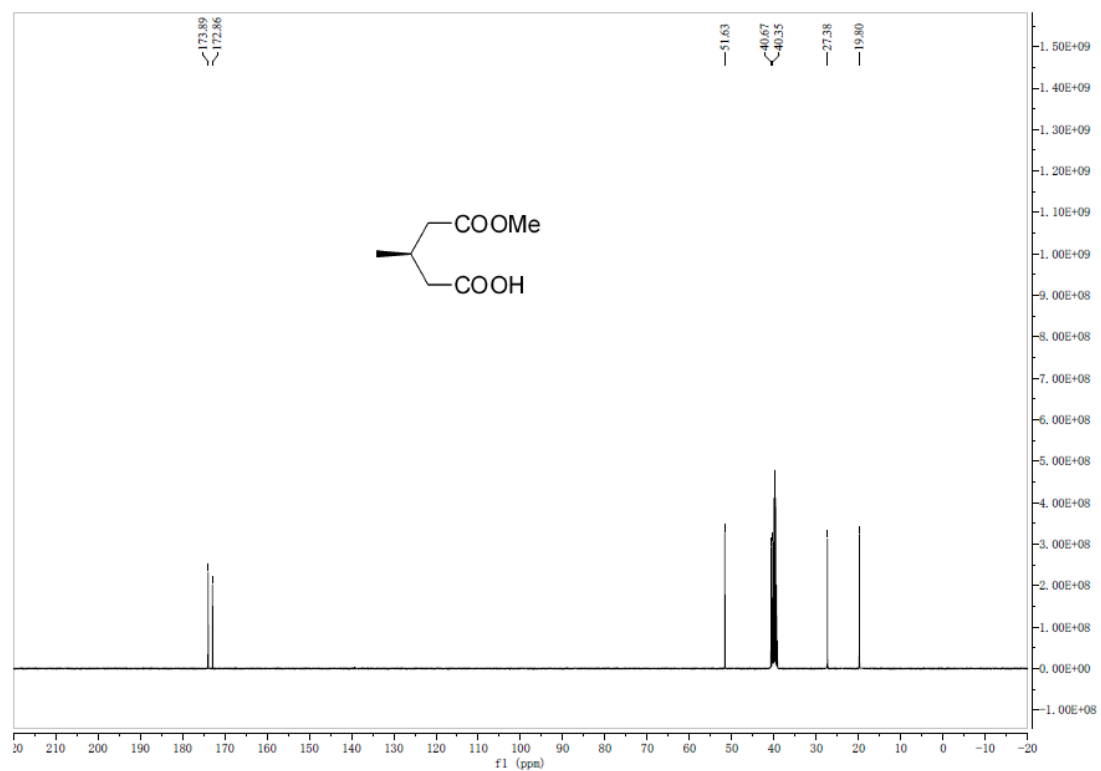

**(R)-3-Ethyl-5-methoxy-5-oxopentanoic acid (9f)**

<sup>1</sup>H NMR

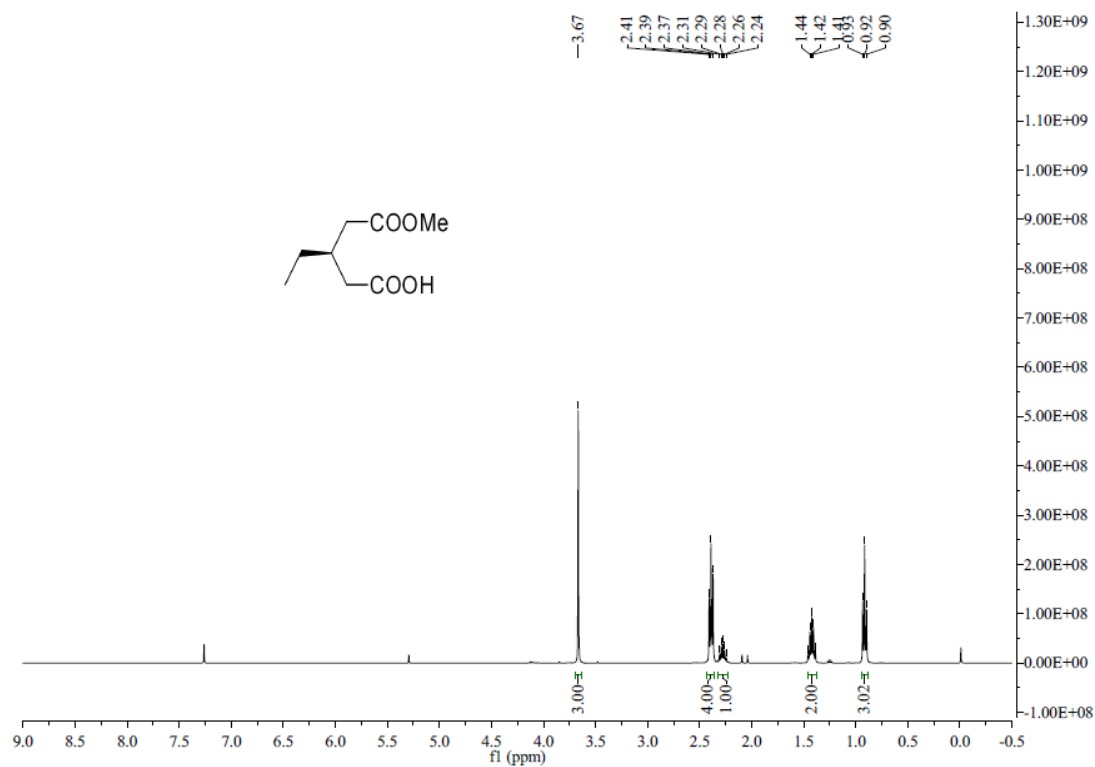

<sup>13</sup>C NMR

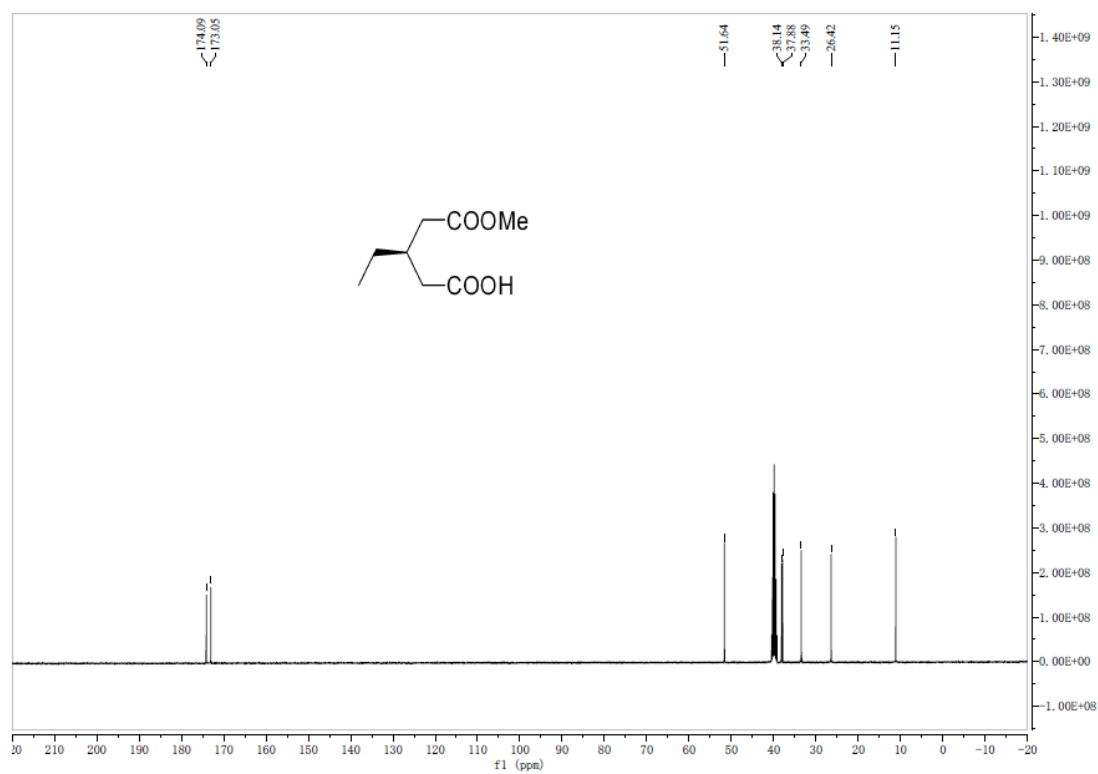

**(R)-3-Isopropyl-5-methoxy-5-oxopentanoic acid (9g)**

<sup>1</sup>H NMR

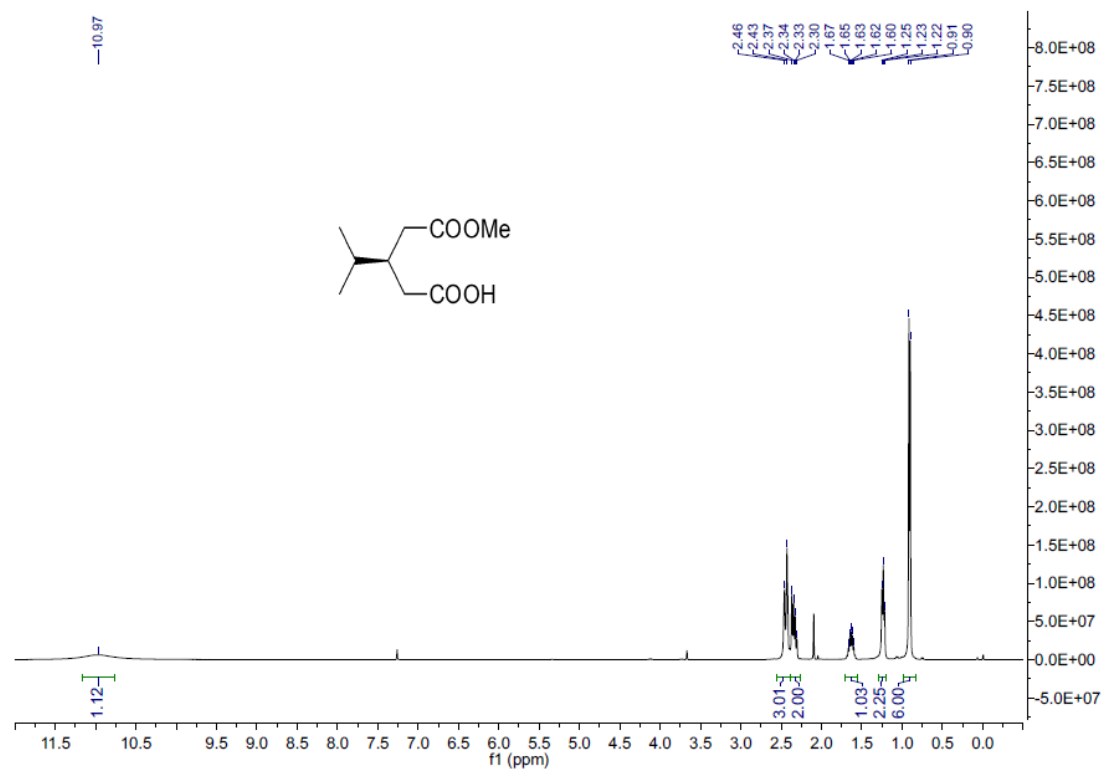

<sup>13</sup>C NMR

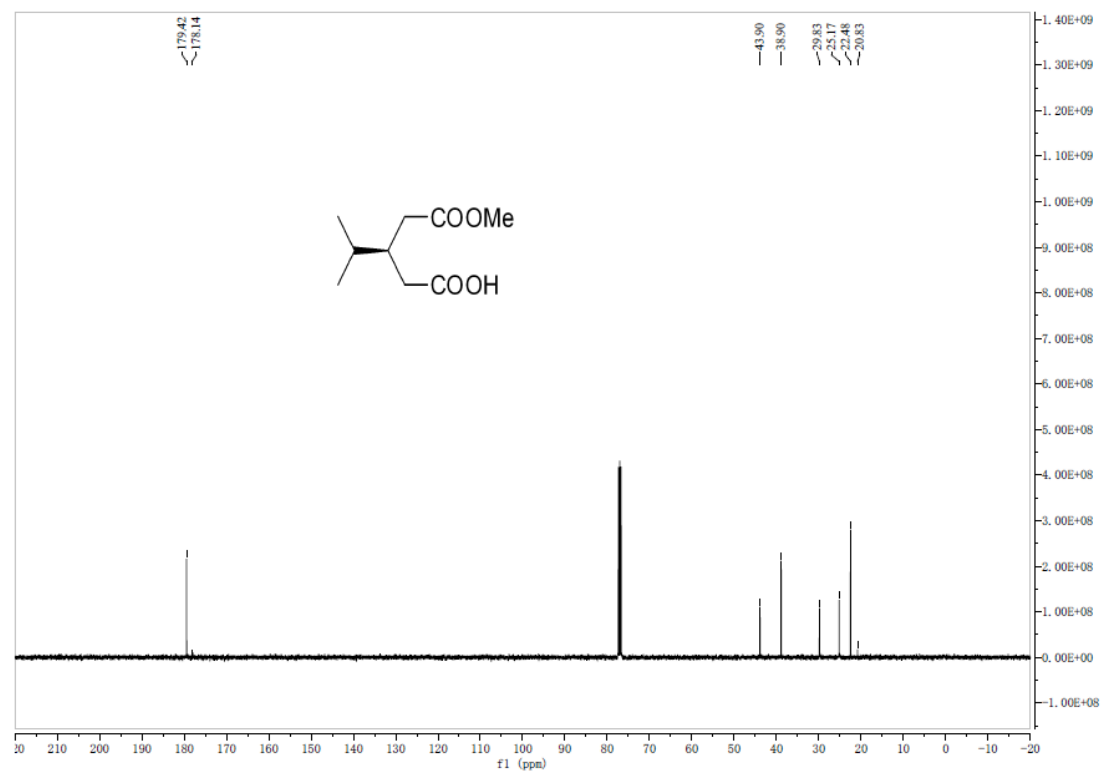

**(R)-3-(Allyloxy)-5-methoxy-5-oxopentanoic acid (9h)**

<sup>1</sup>H NMR

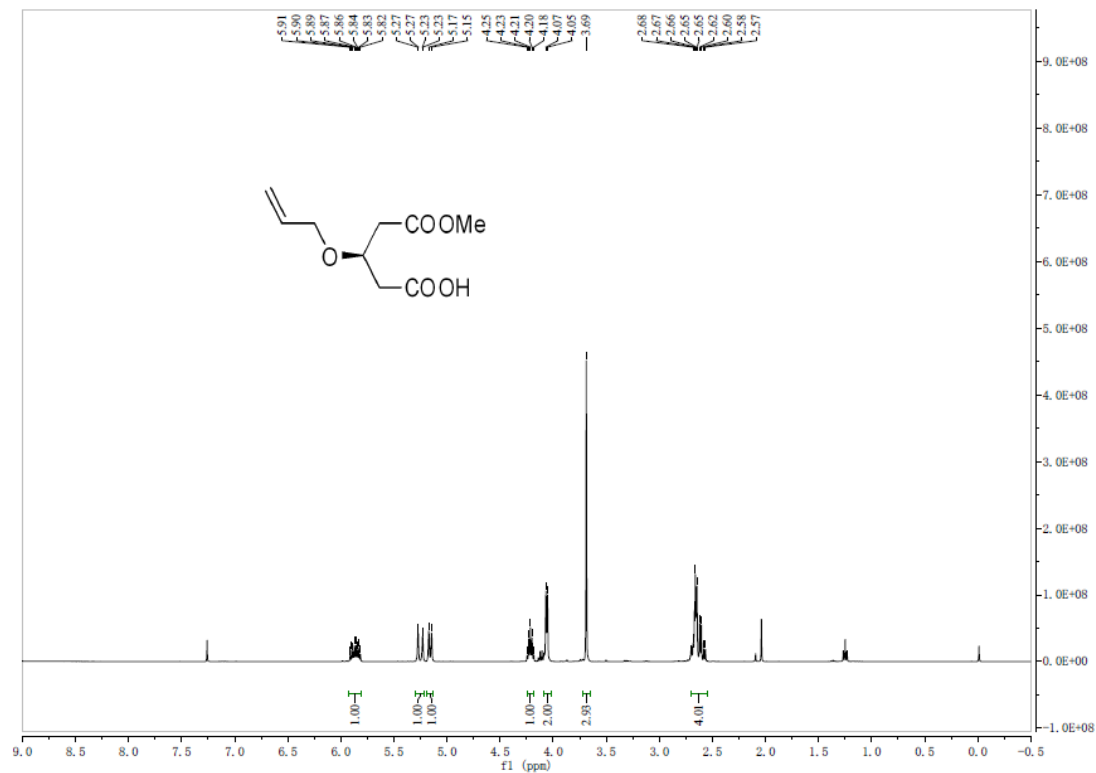

<sup>13</sup>C NMR

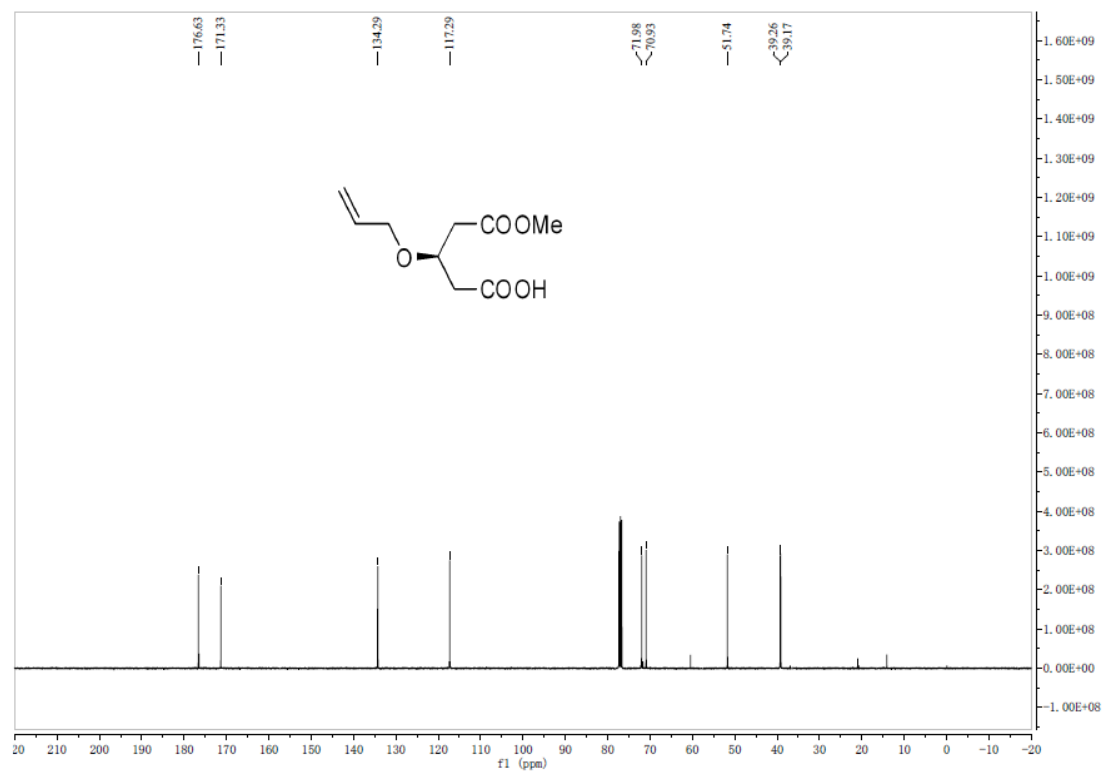

## HRMS

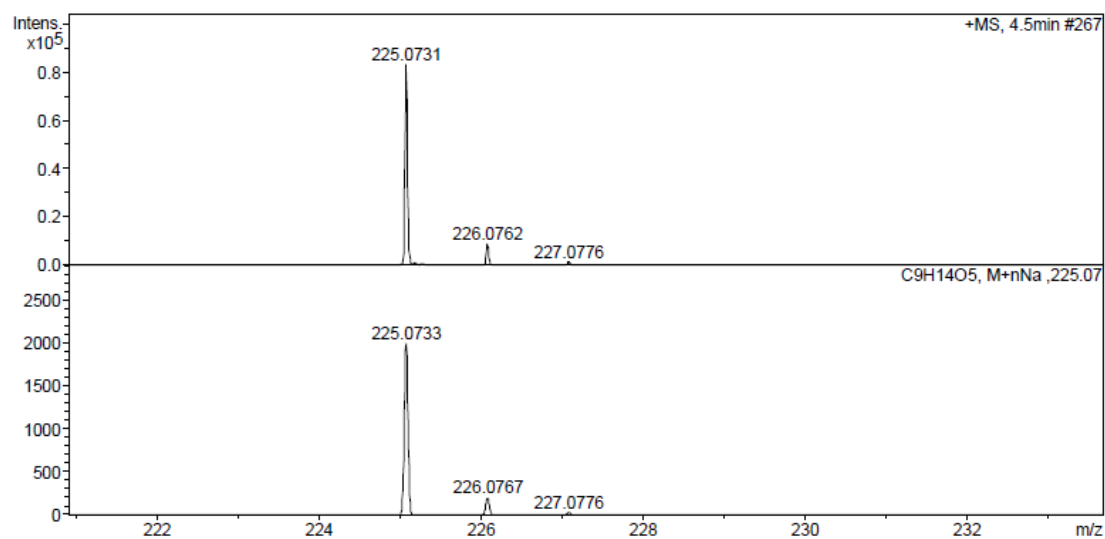

## (*R*)-5-Methoxy-5-oxo-3-phenylpentanoic acid (**9i**)

### <sup>1</sup>H NMR

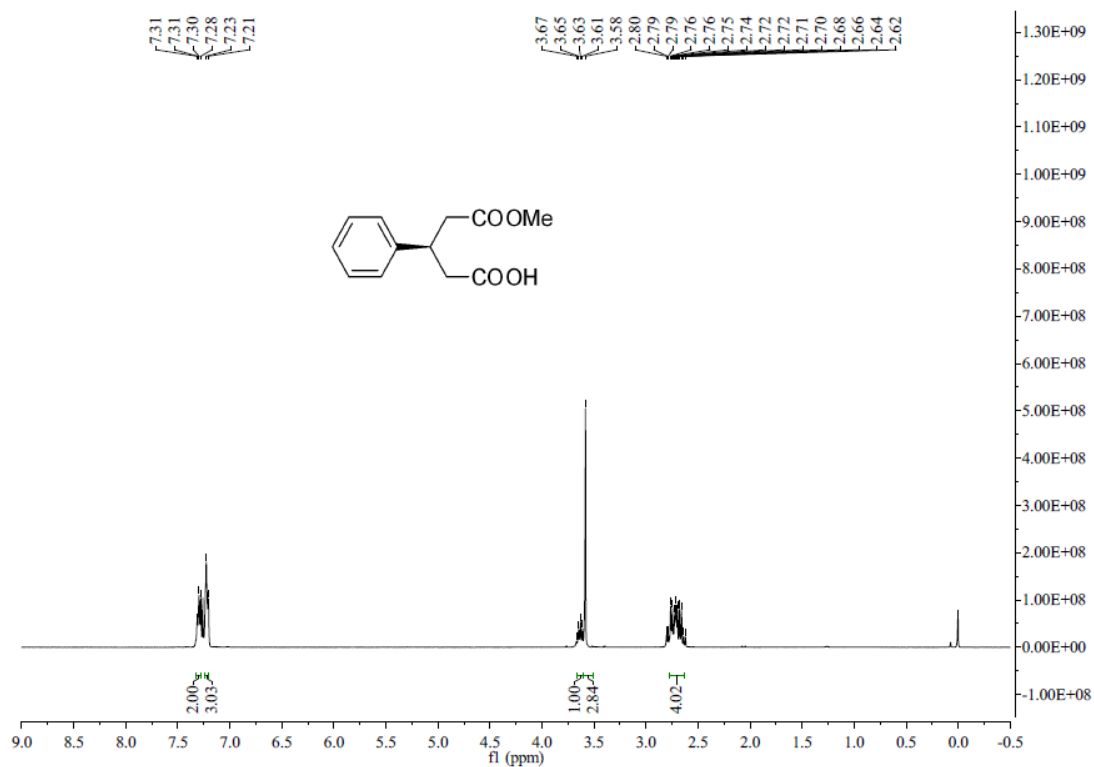

### <sup>13</sup>C NMR



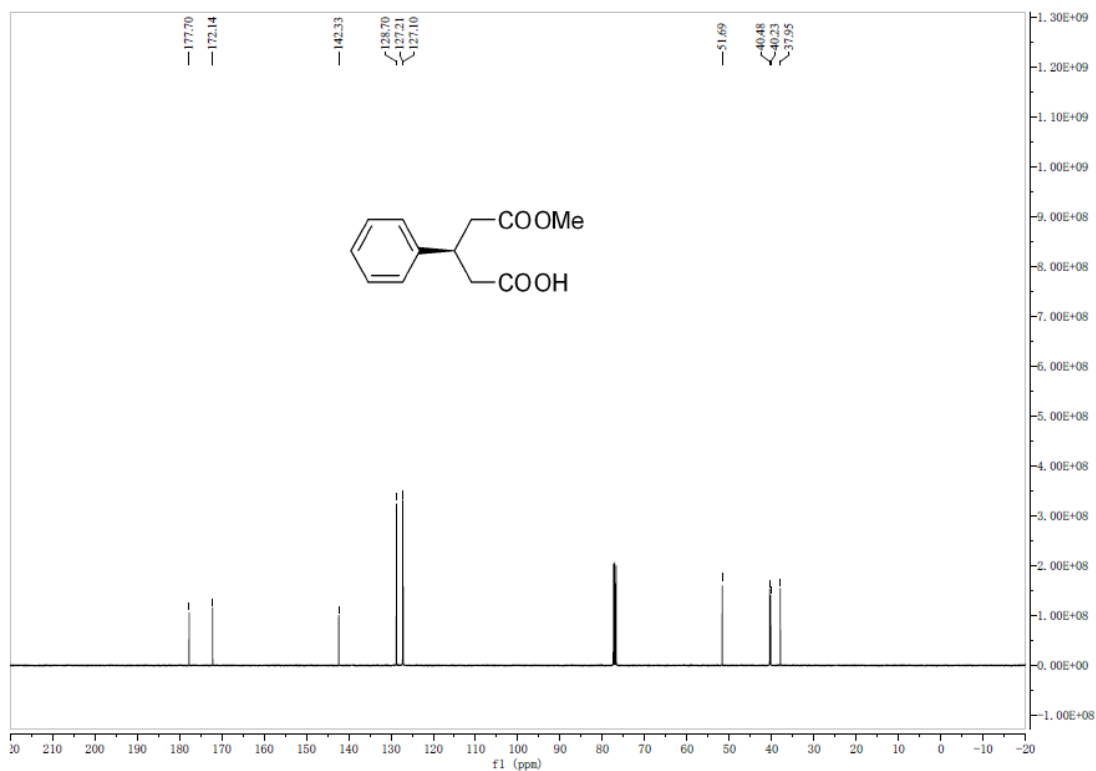

**(R)-3-(4-chlorophenyl)-5-methoxy-5-oxopentanoic acid (9j)**

<sup>1</sup>H NMR

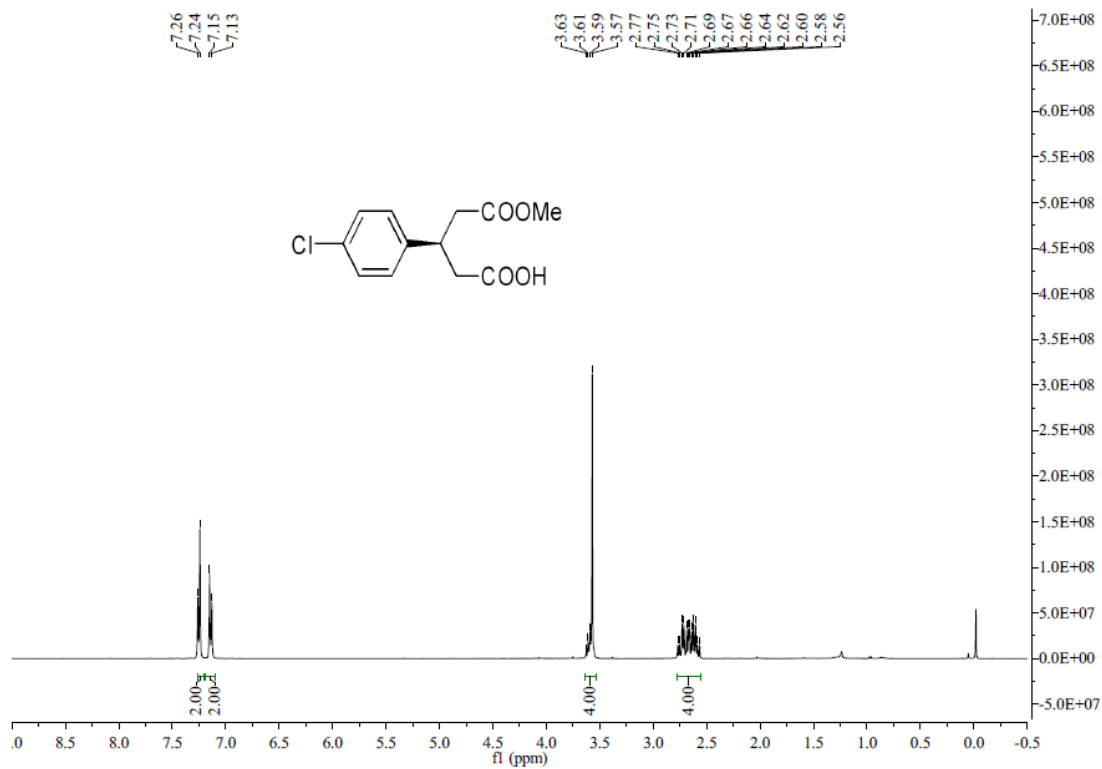

# <sup>13</sup>C NMR

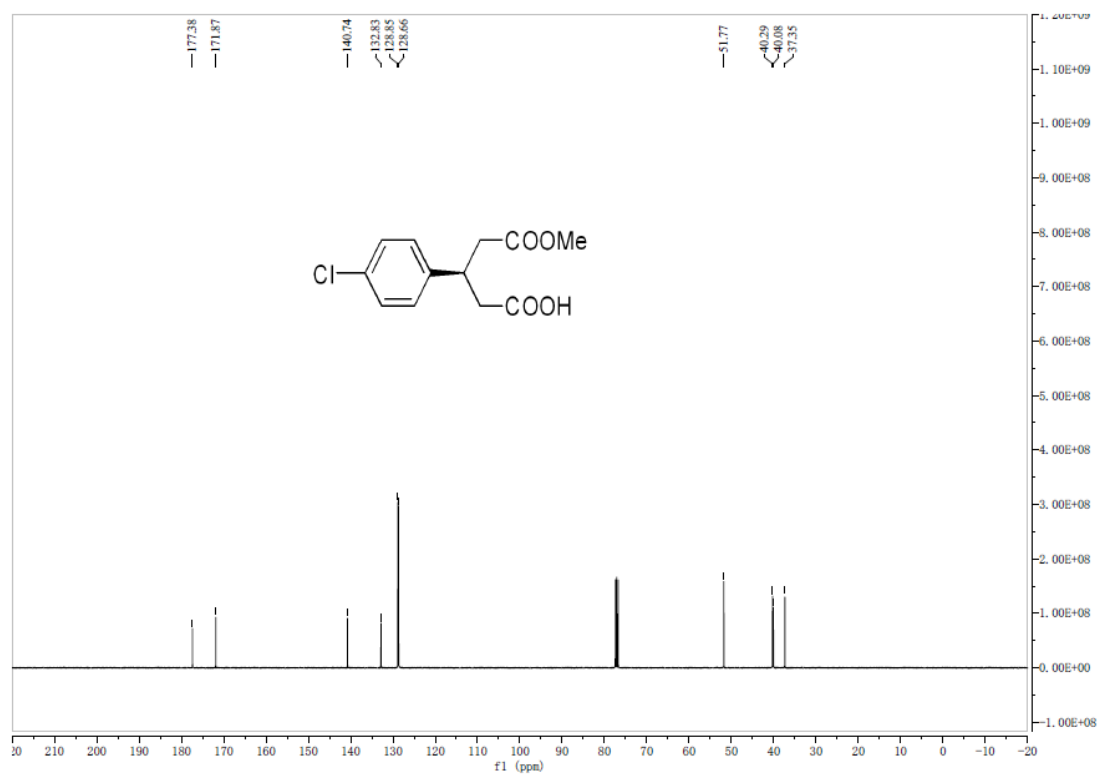

## (R)-5-Methoxy-5-oxo-3-(p-tolyl)pentanoic acid (9k)

### <sup>1</sup>H NMR

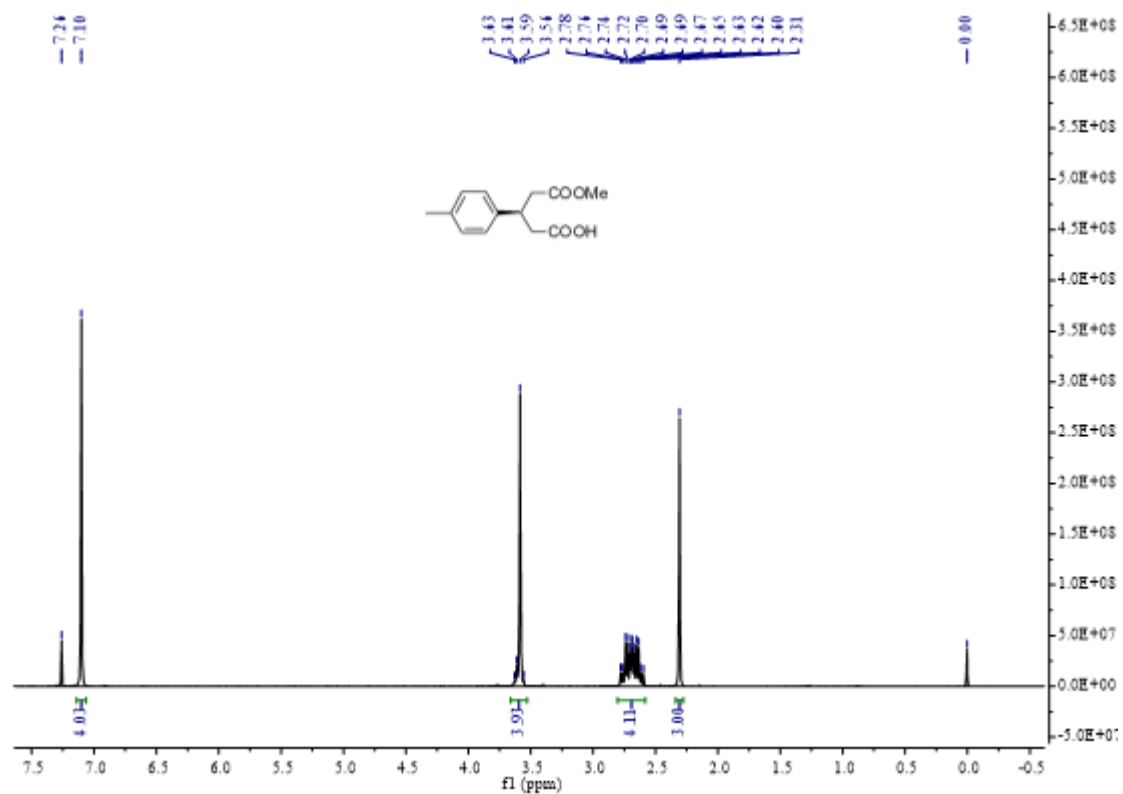

# <sup>13</sup>C NMR

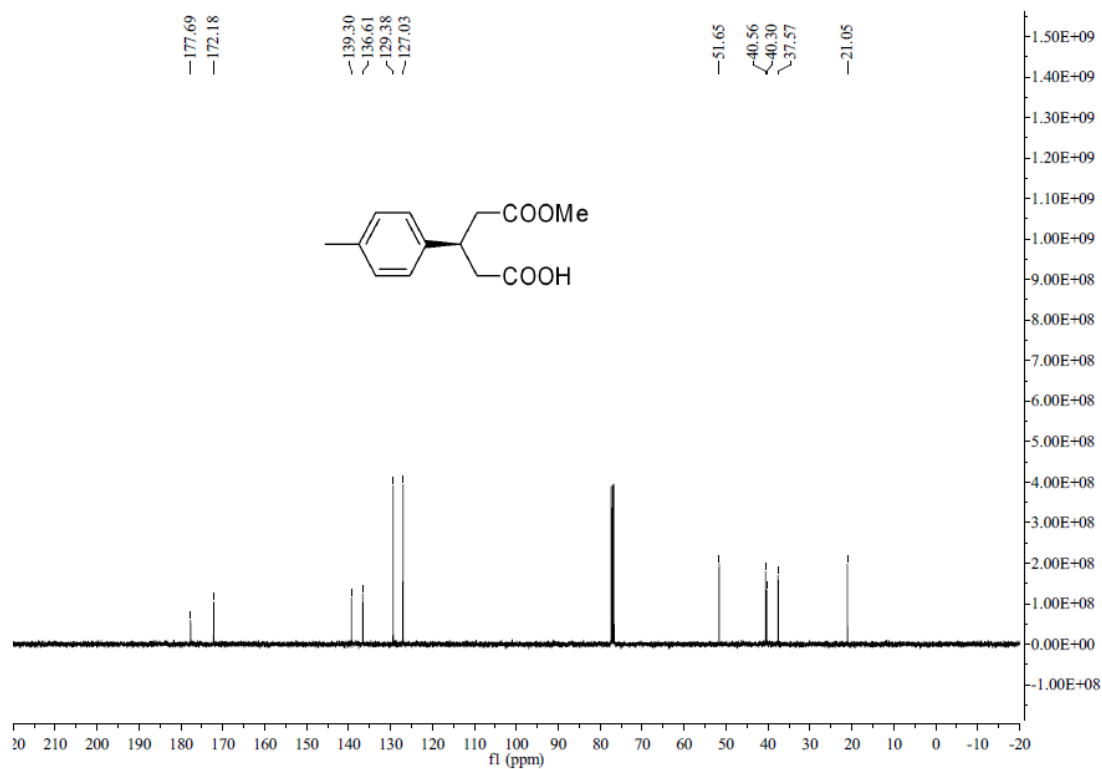

## (R)-5-Methoxy-3-(4-methoxyphenyl)-5-oxopentanoic acid (9l)

# <sup>1</sup>H NMR

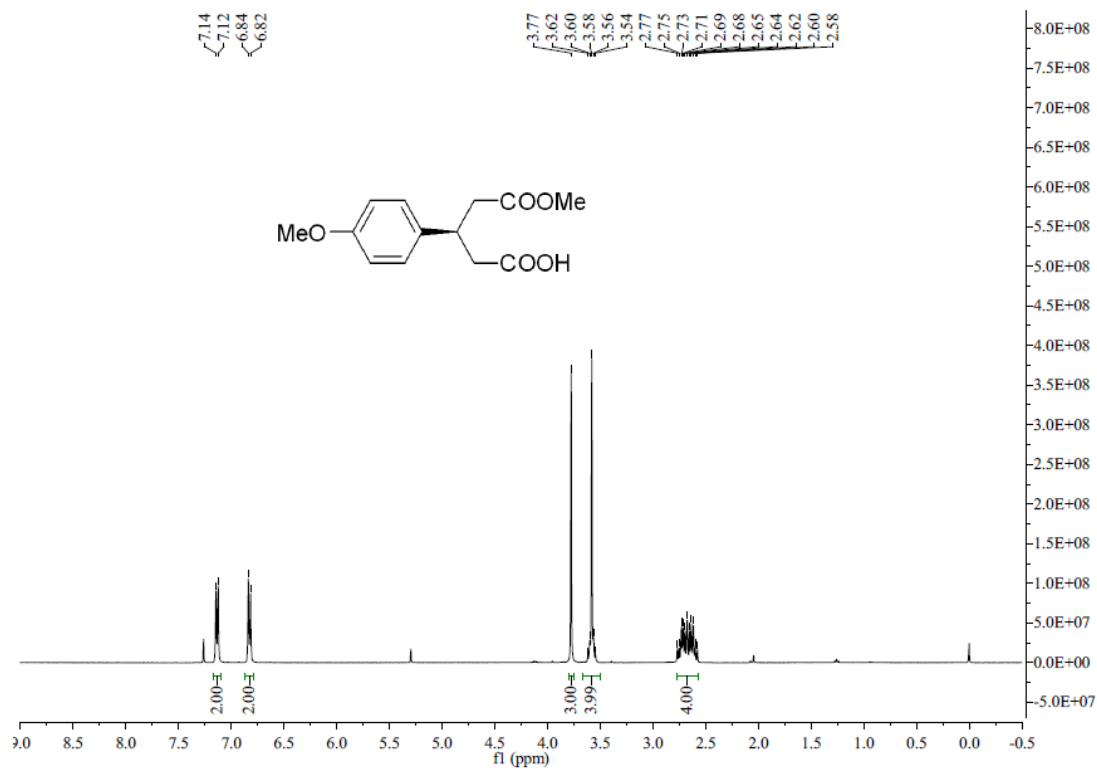

# <sup>13</sup>C NMR

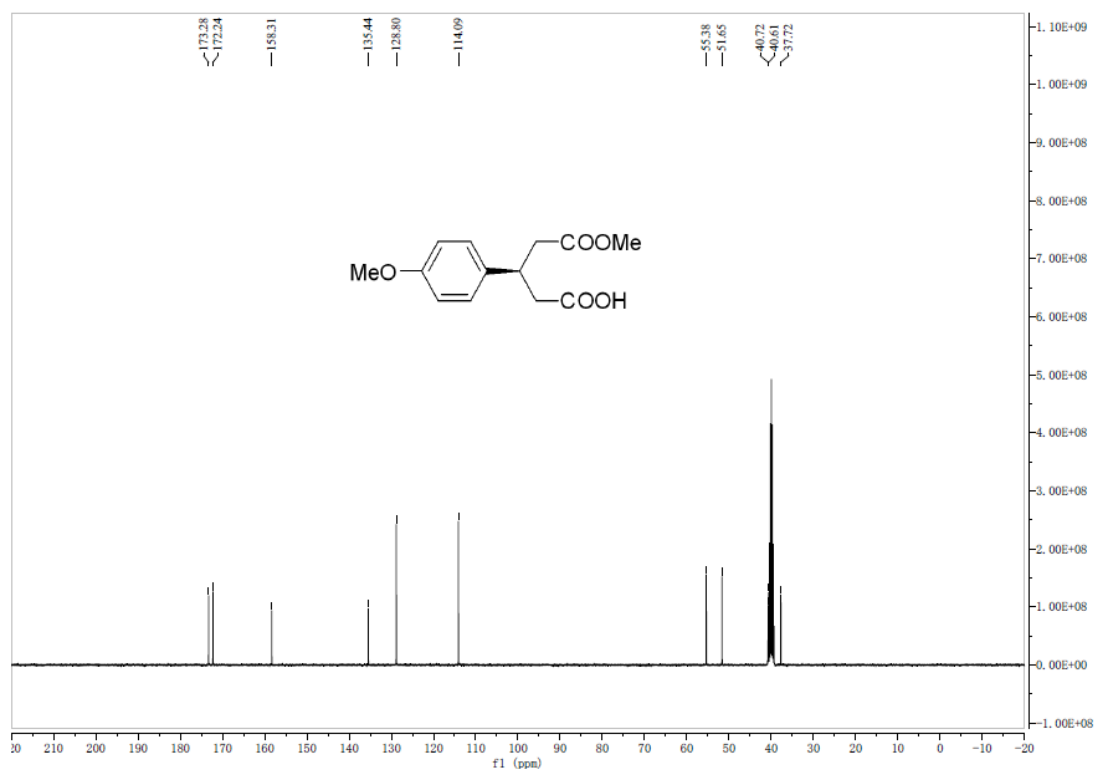

# (1*S*,6*R*)-6-(Ethoxycarbonyl)cyclohex-3-enecarboxylic acid (**9m**)

## <sup>1</sup>H NMR

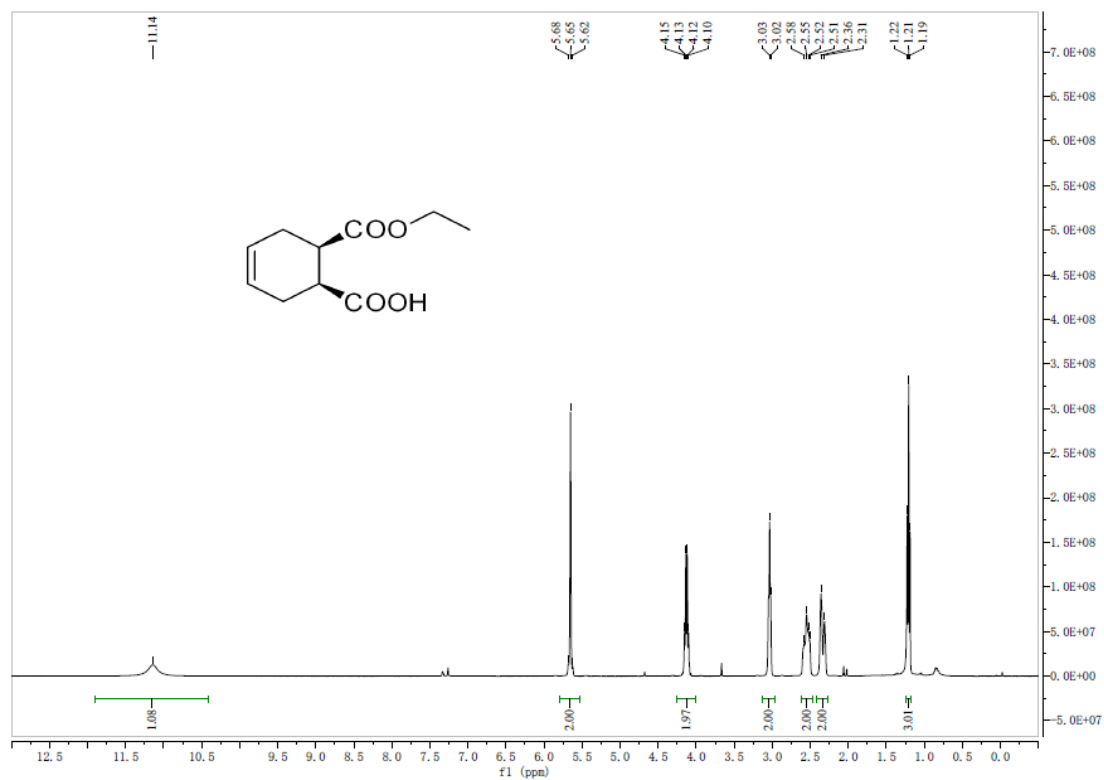

# <sup>13</sup>C NMR

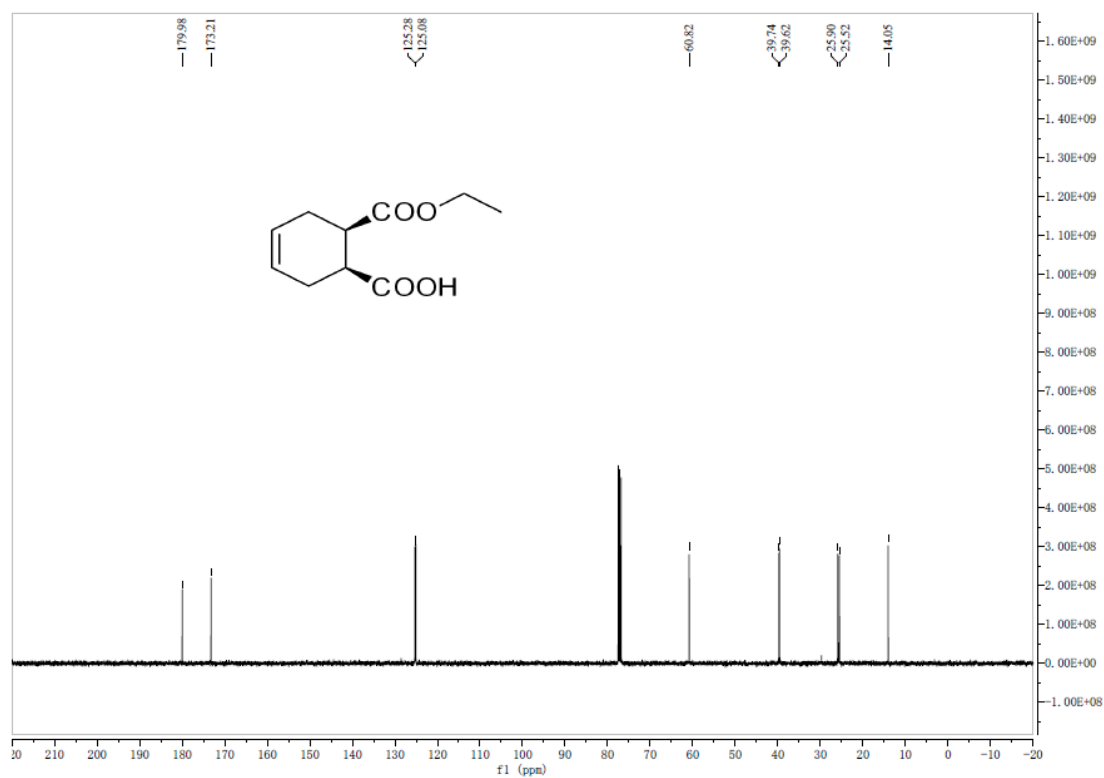

## (1*S*,6*R*)-6-(isopropoxycarbonyl)cyclohex-3-ene-1-carboxylic acid (9n)

# <sup>1</sup>H NMR

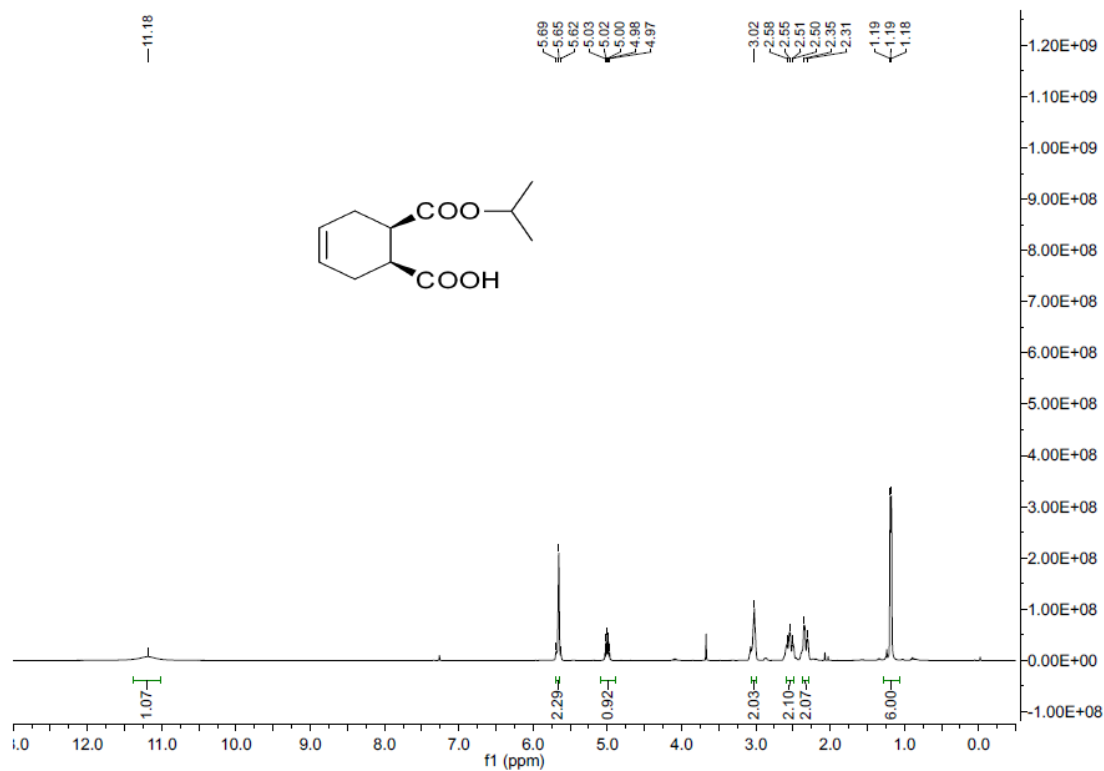

# <sup>13</sup>C NMR

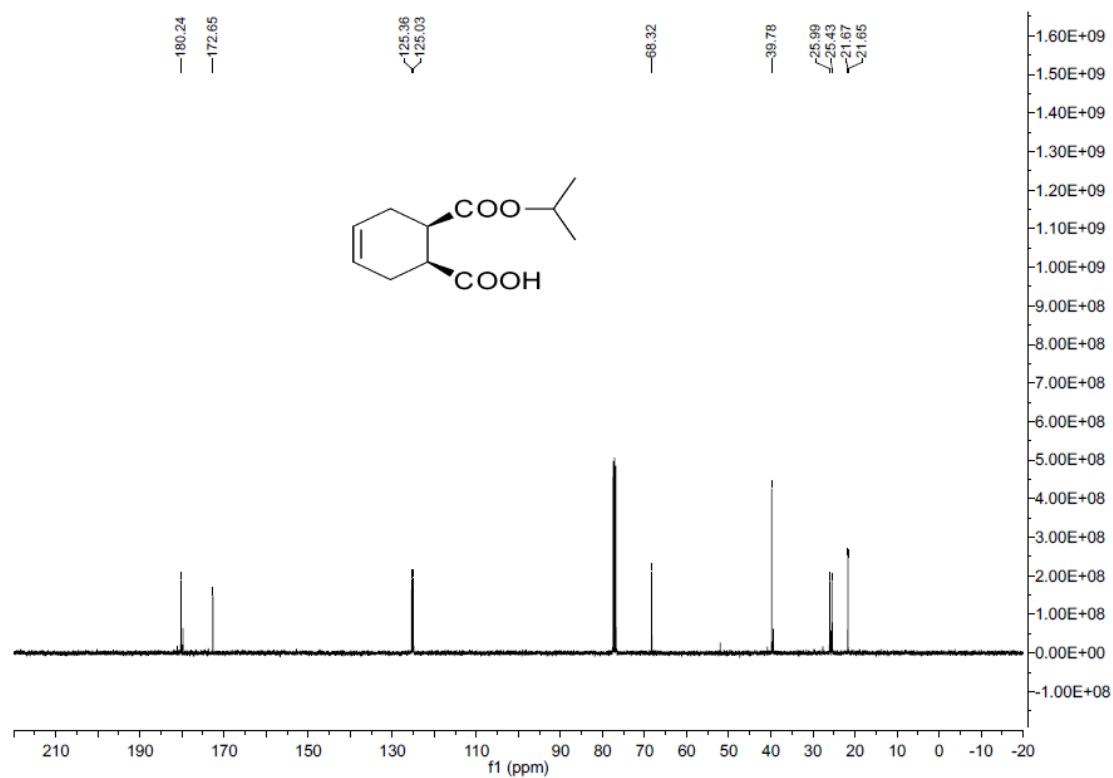

## (1S,6R)-6-((Allyloxy)carbonyl)cyclohex-3-enecarboxylic acid (9o)

# <sup>1</sup>H NMR

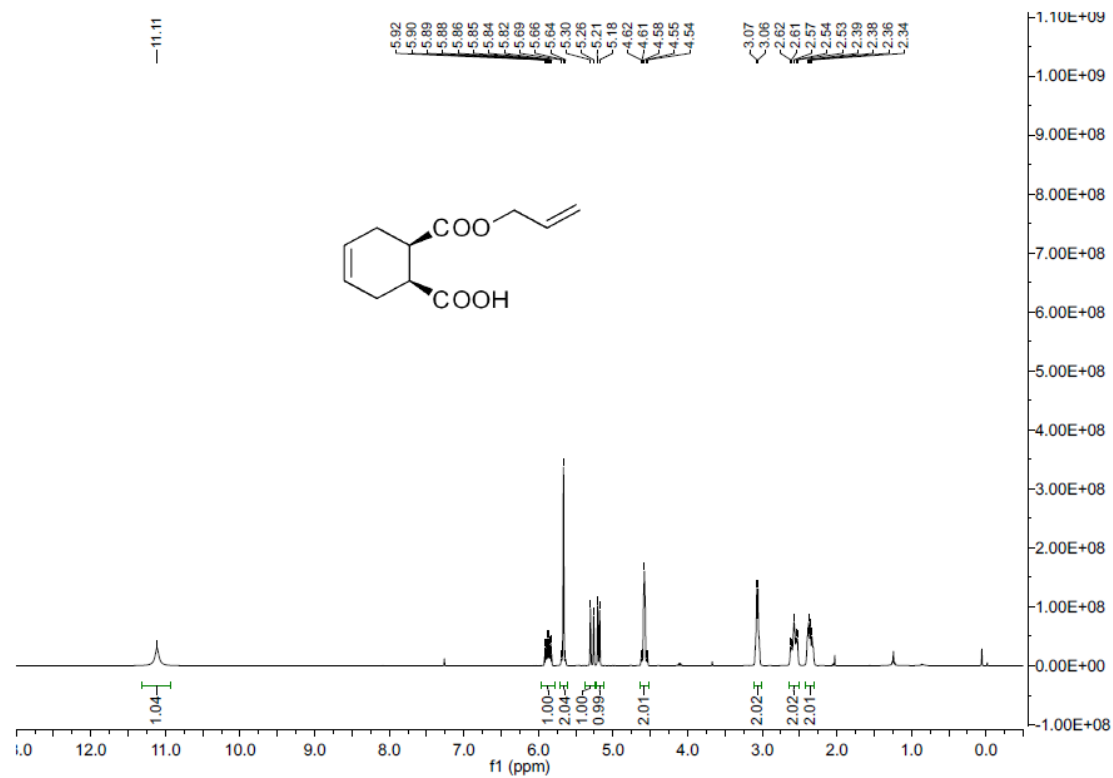

### <sup>13</sup>C NMR

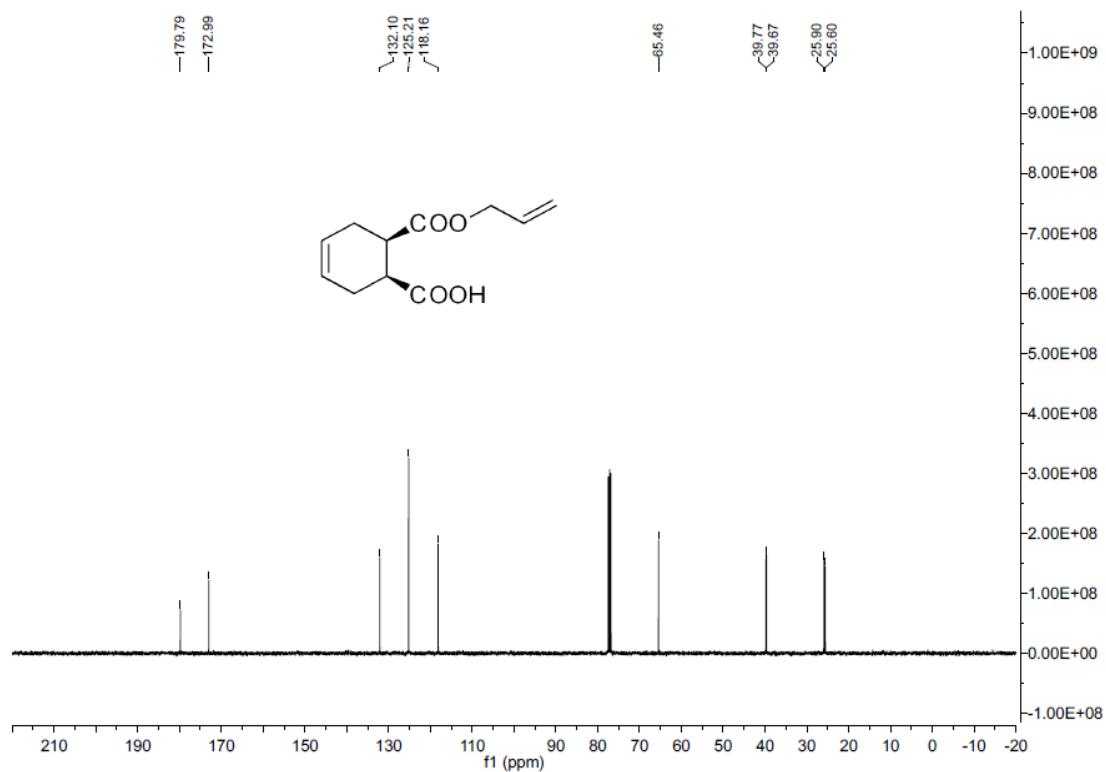

### (1S,6R)-6-((Benzyloxy)carbonyl)cyclohex-3-enecarboxylic acid (9p)

### <sup>1</sup>H NMR

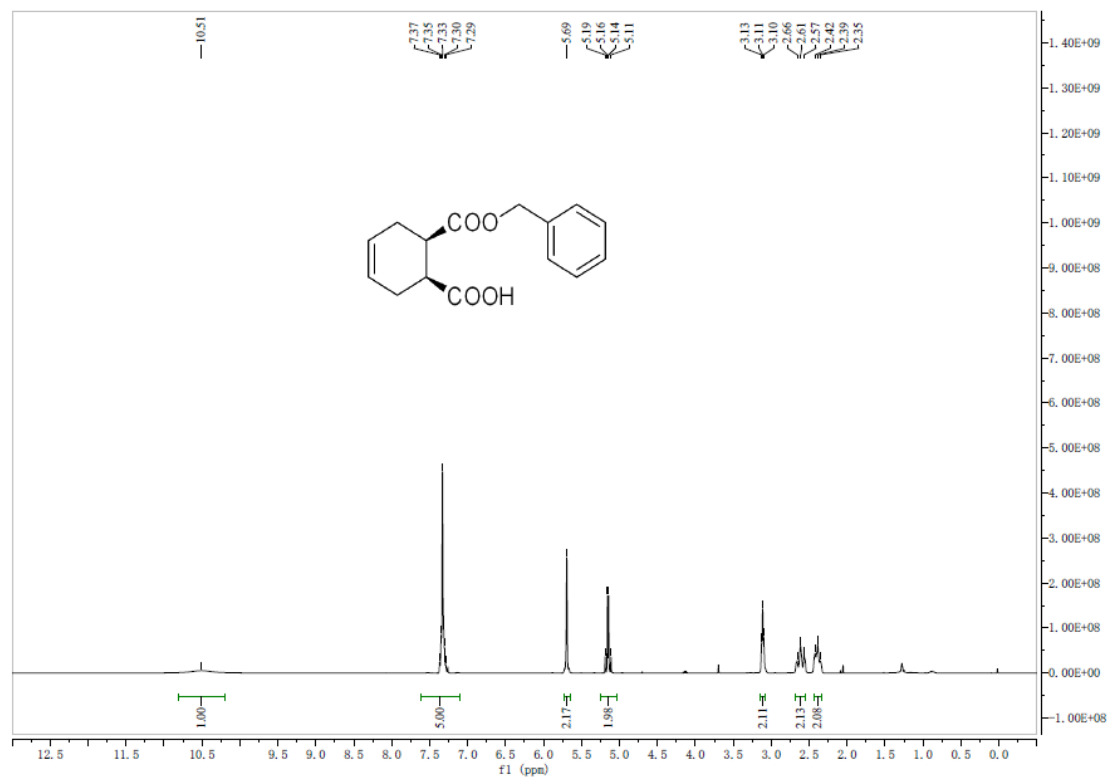

# <sup>13</sup>C NMR

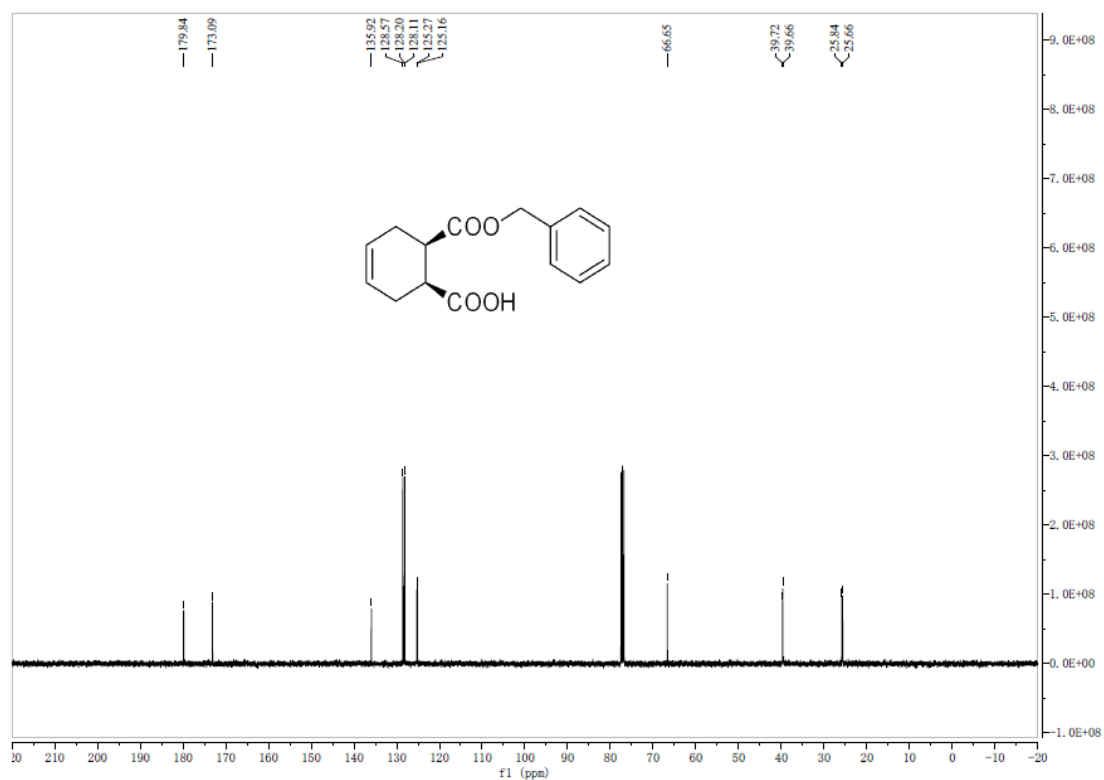

## (1S,6R)-6-((Cinnamyloxy)carbonyl)cyclohex-3-enecarboxylic acid (9q)

# <sup>1</sup>H NMR

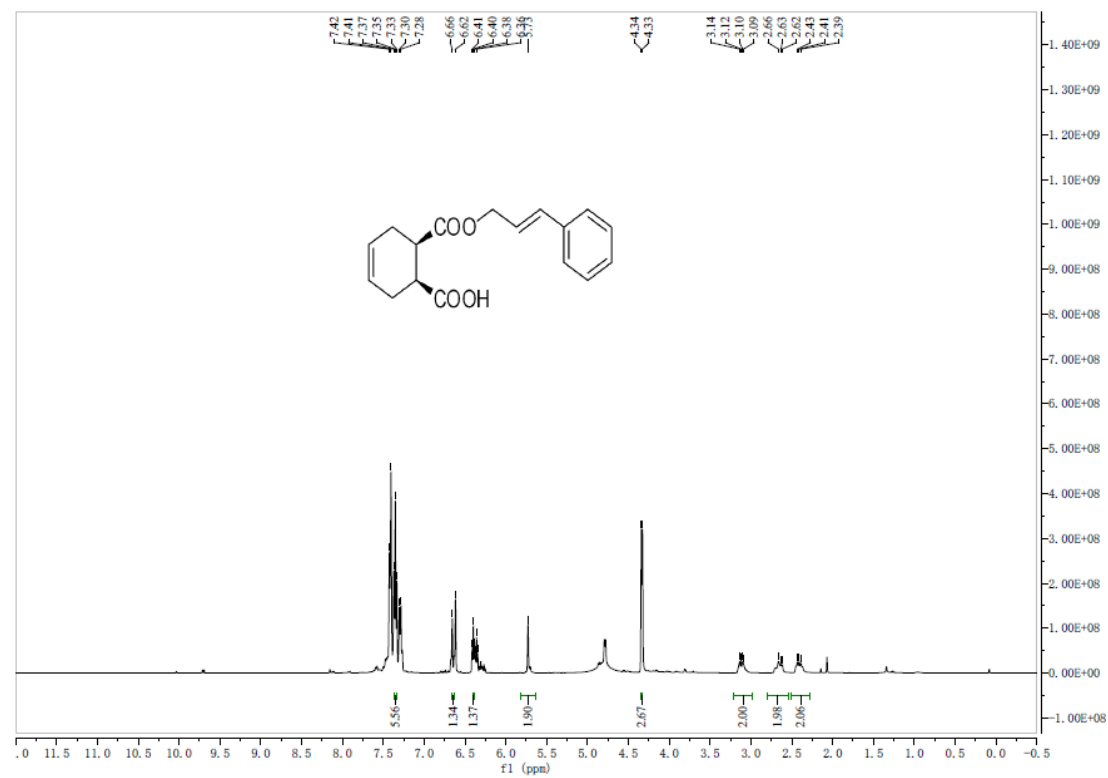



# <sup>13</sup>C NMR

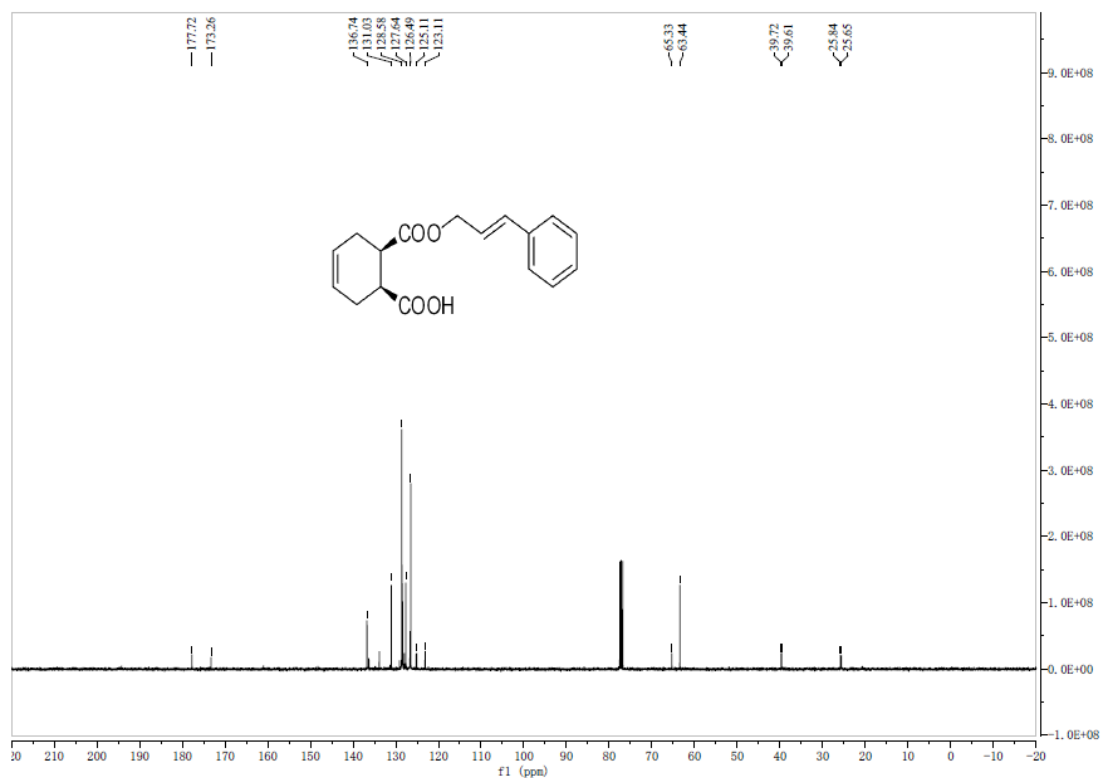

## Dimethyl 3-(allyloxy)pentanedioate (14)

### <sup>1</sup>H NMR

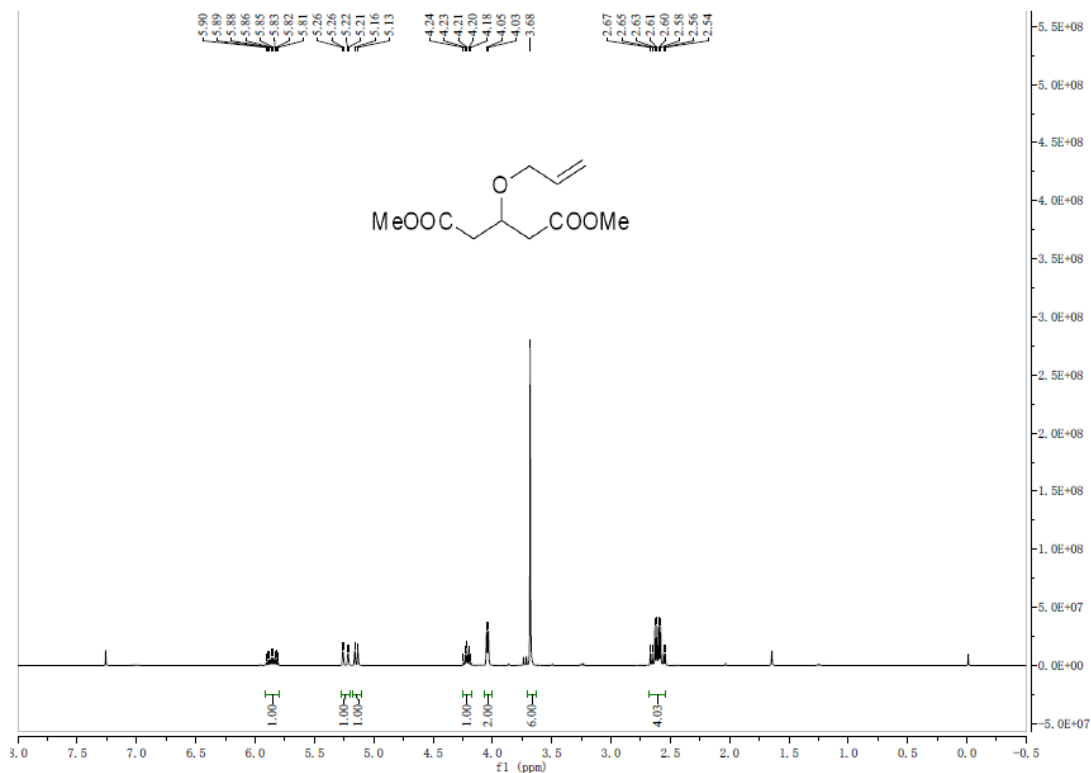

# <sup>13</sup>C NMR

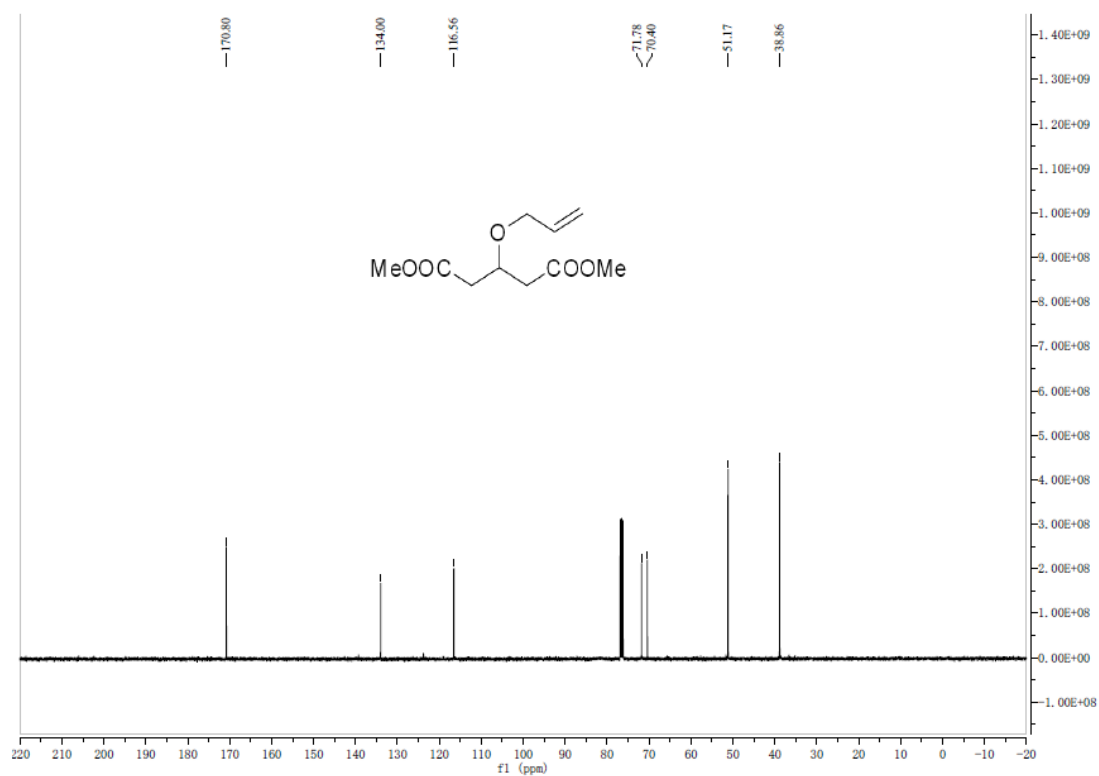

# HRMS

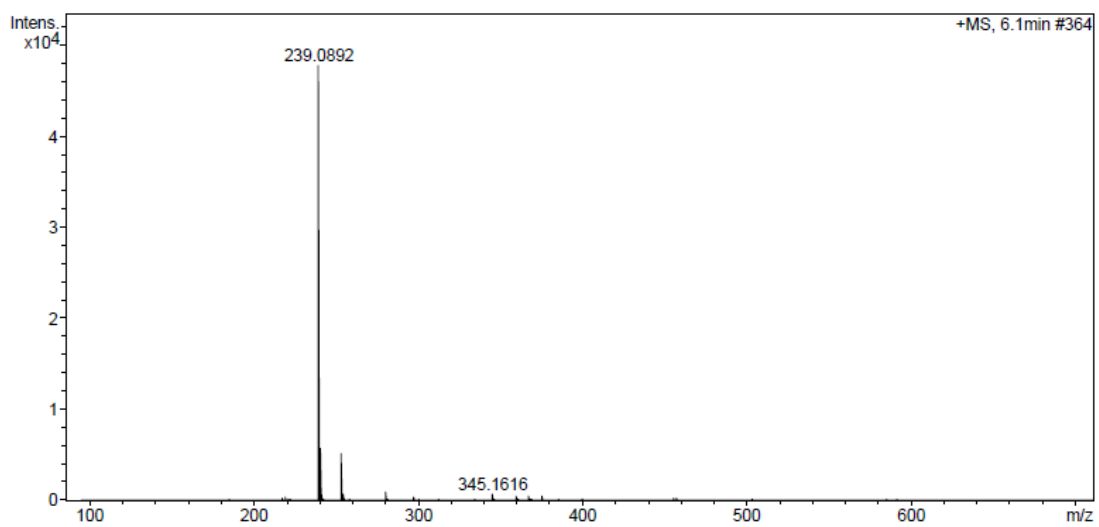

### 3-(Allyloxy)pentanedioic acid (15)

<sup>1</sup>H NMR

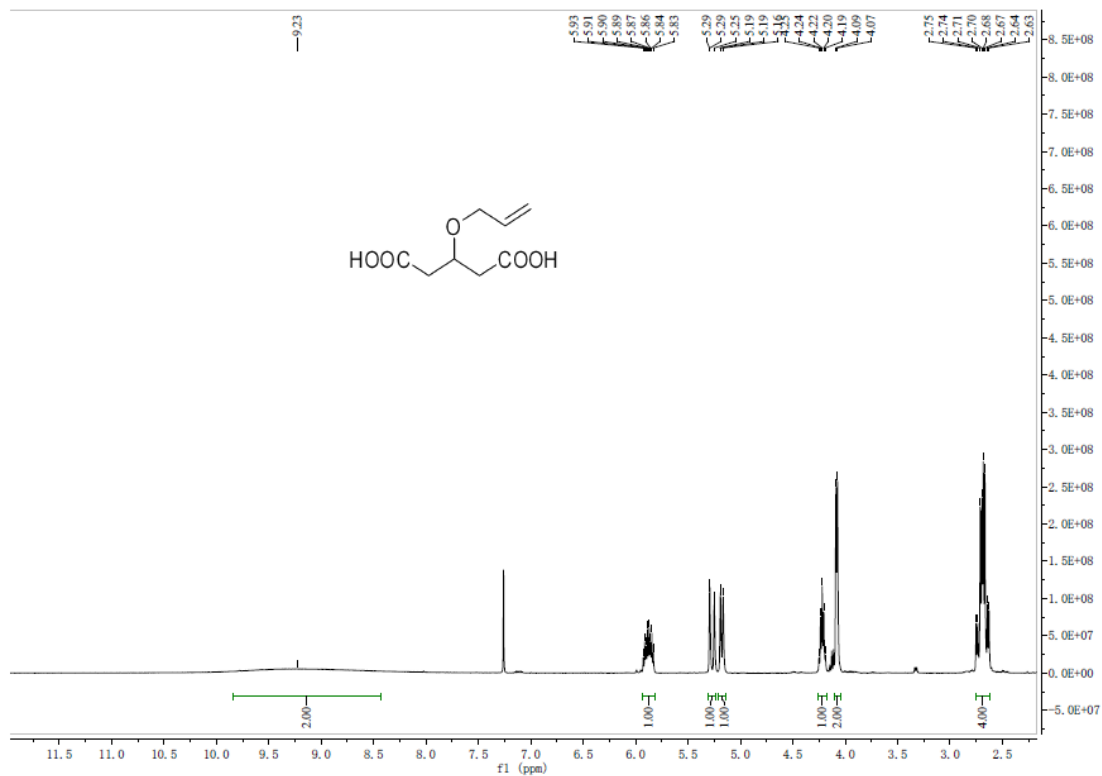

<sup>13</sup>C NMR

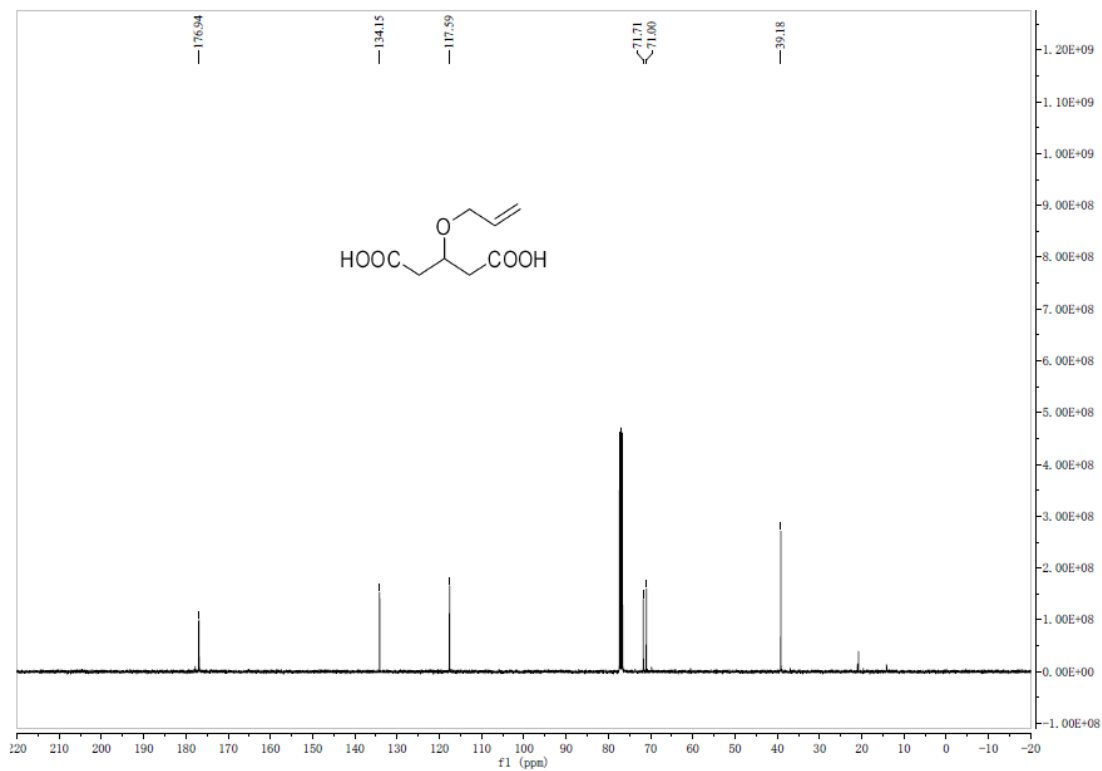

## HRMS

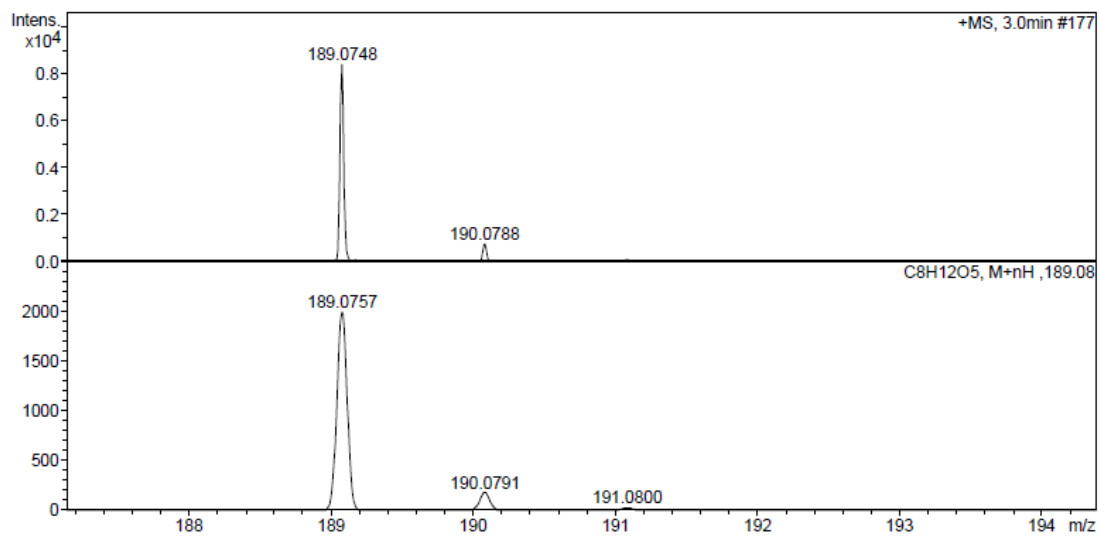

## 3-(Allyloxy)glutaric anhydride (8h)

### <sup>1</sup>H NMR

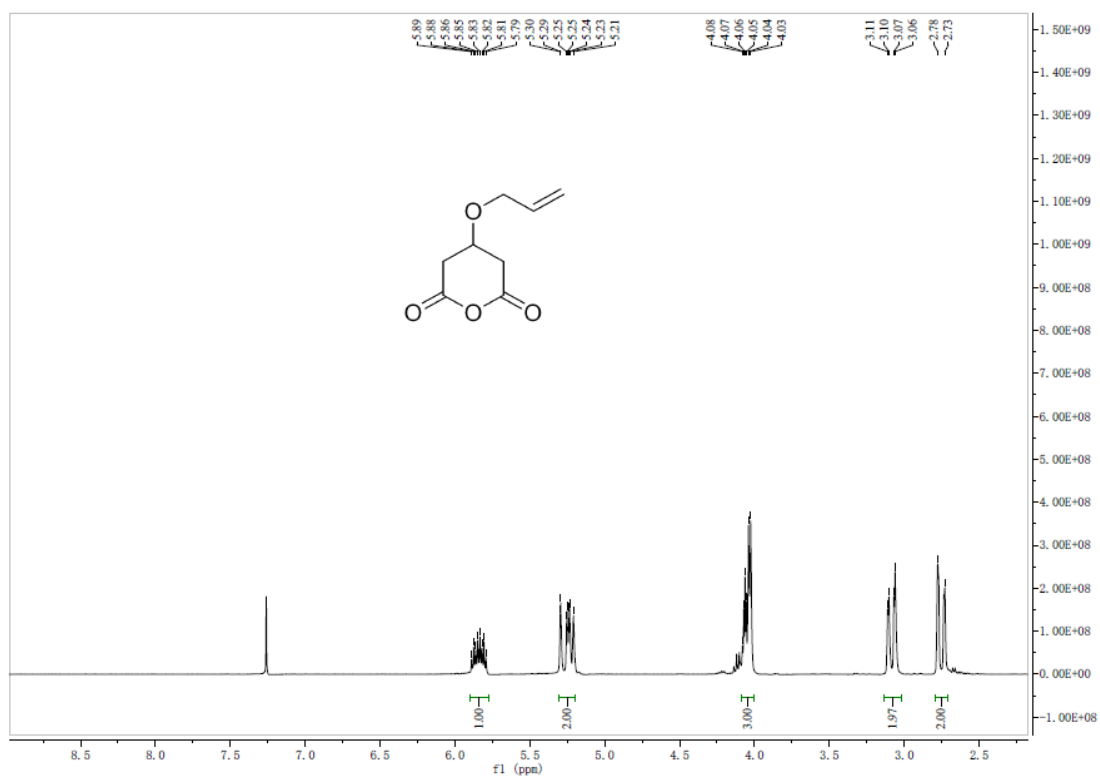

# <sup>13</sup>C NMR

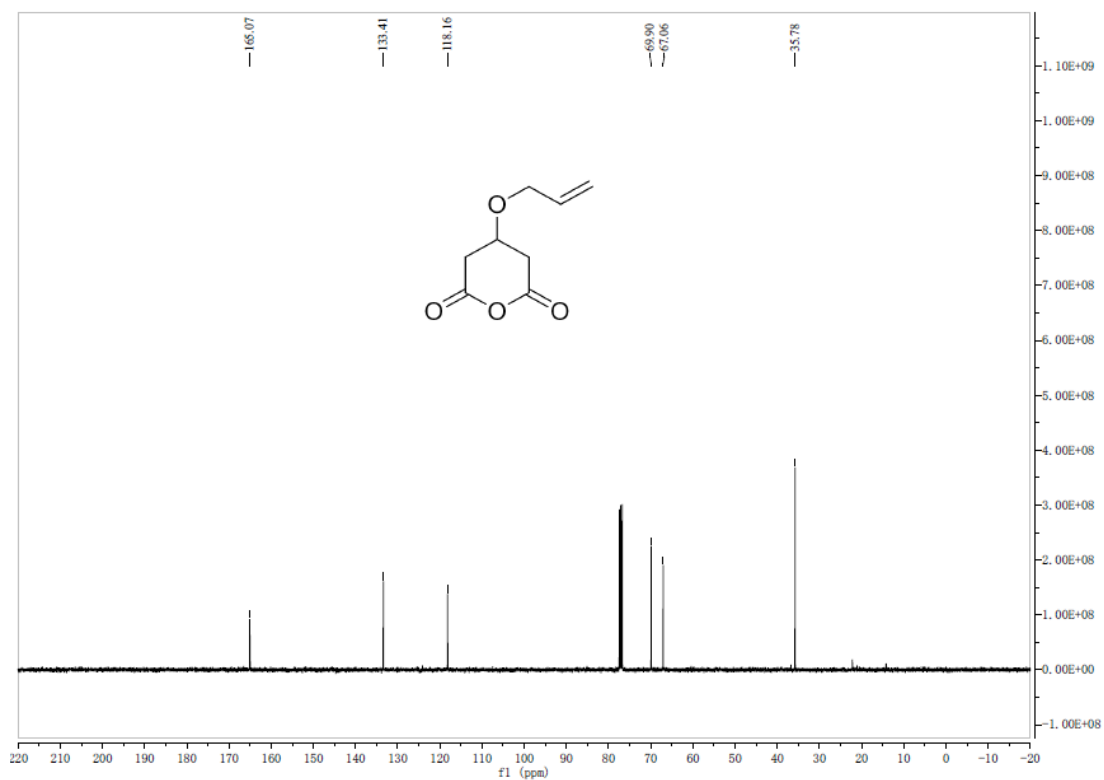

# HRMS

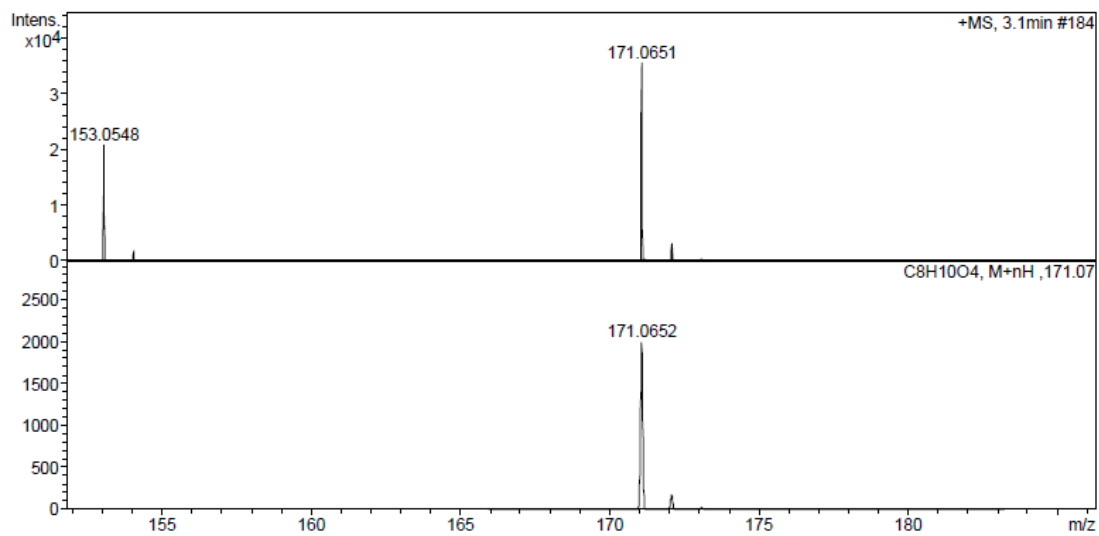

**(S)-Methyl-3-(allyloxy)-4-(((benzyloxy)carbonyl)amino)butanoate (11)**

<sup>1</sup>H NMR

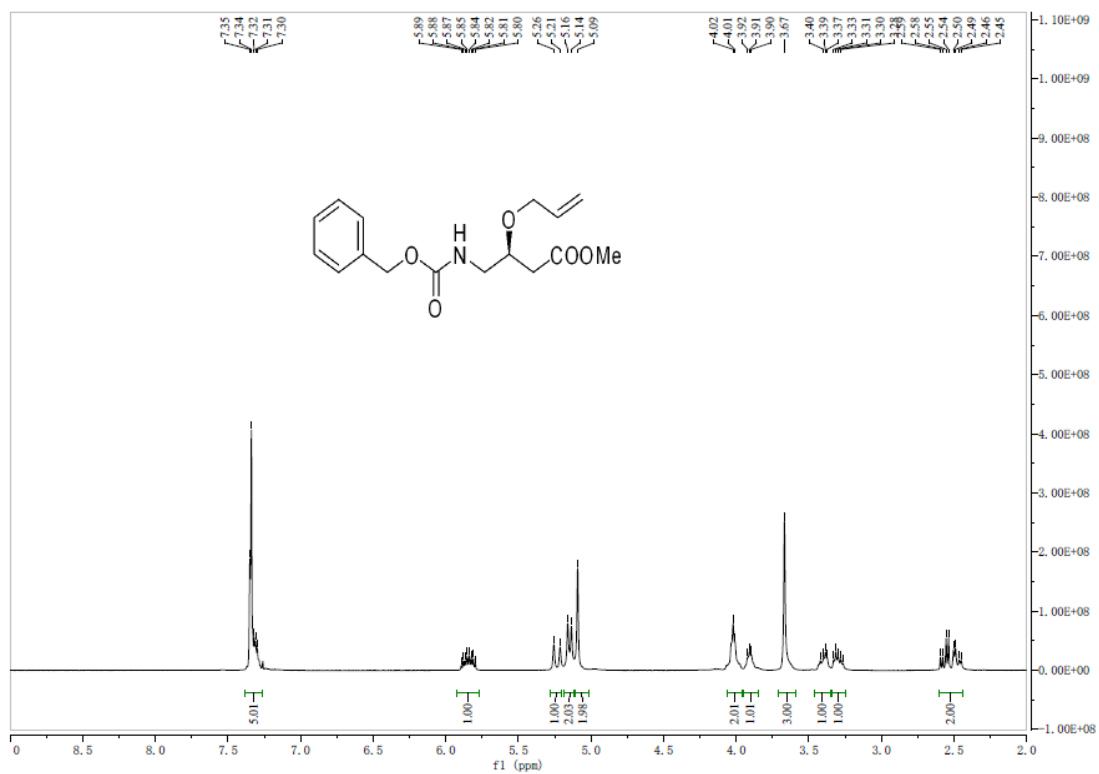

<sup>13</sup>C NMR

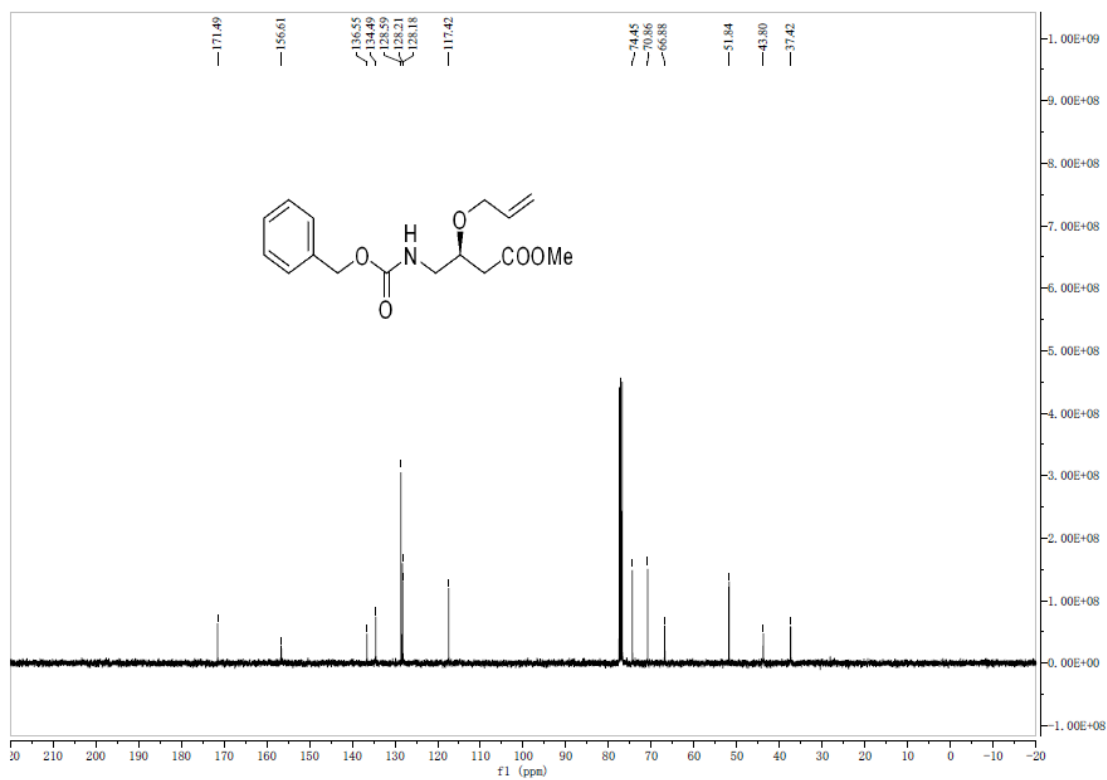

## HRMS

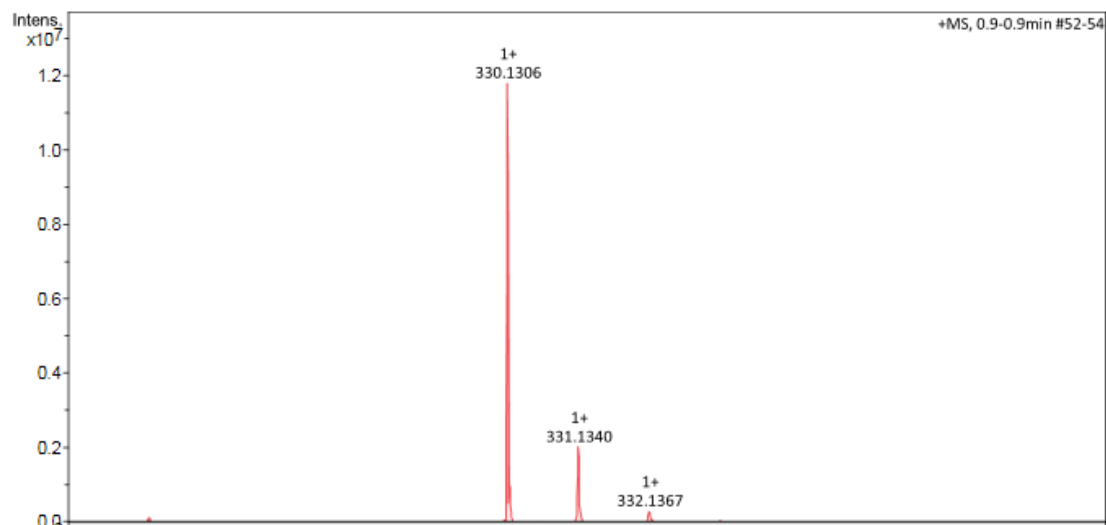

## (S)-Methyl 4-(((benzyloxy)carbonyl)amino)-3-hydroxybutanoate (12)

### <sup>1</sup>H NMR

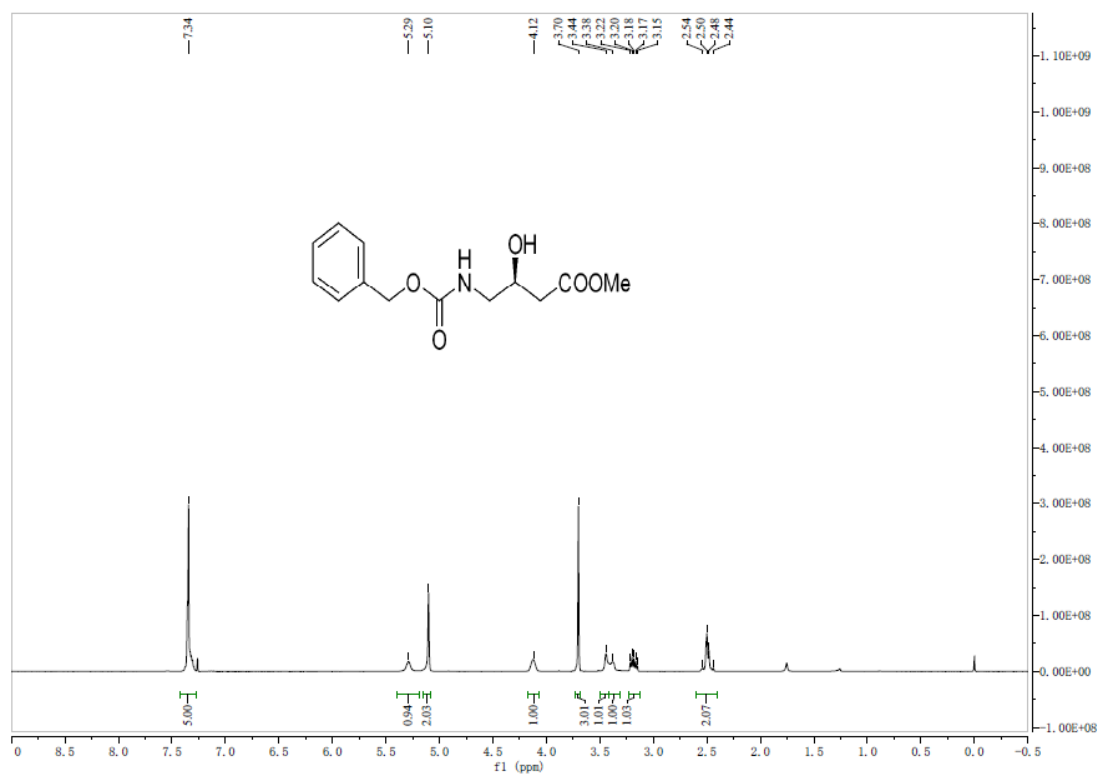

# <sup>13</sup>C NMR

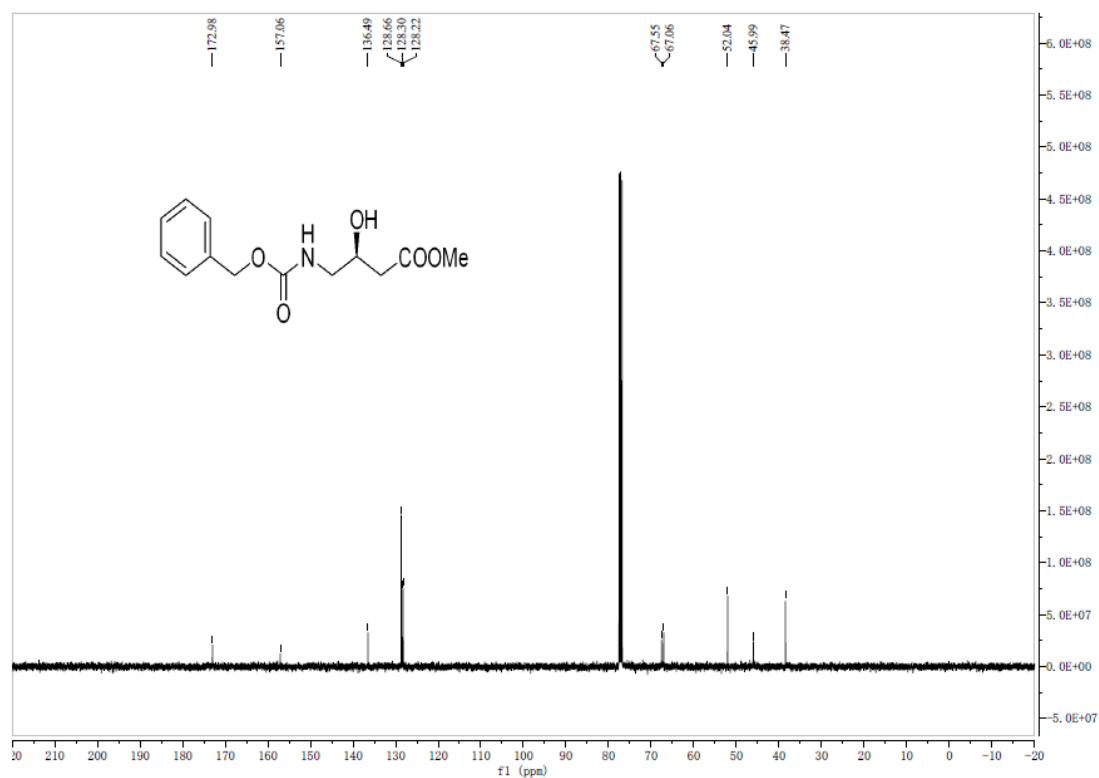

## (S)-GABOB (13)

### <sup>1</sup>H NMR

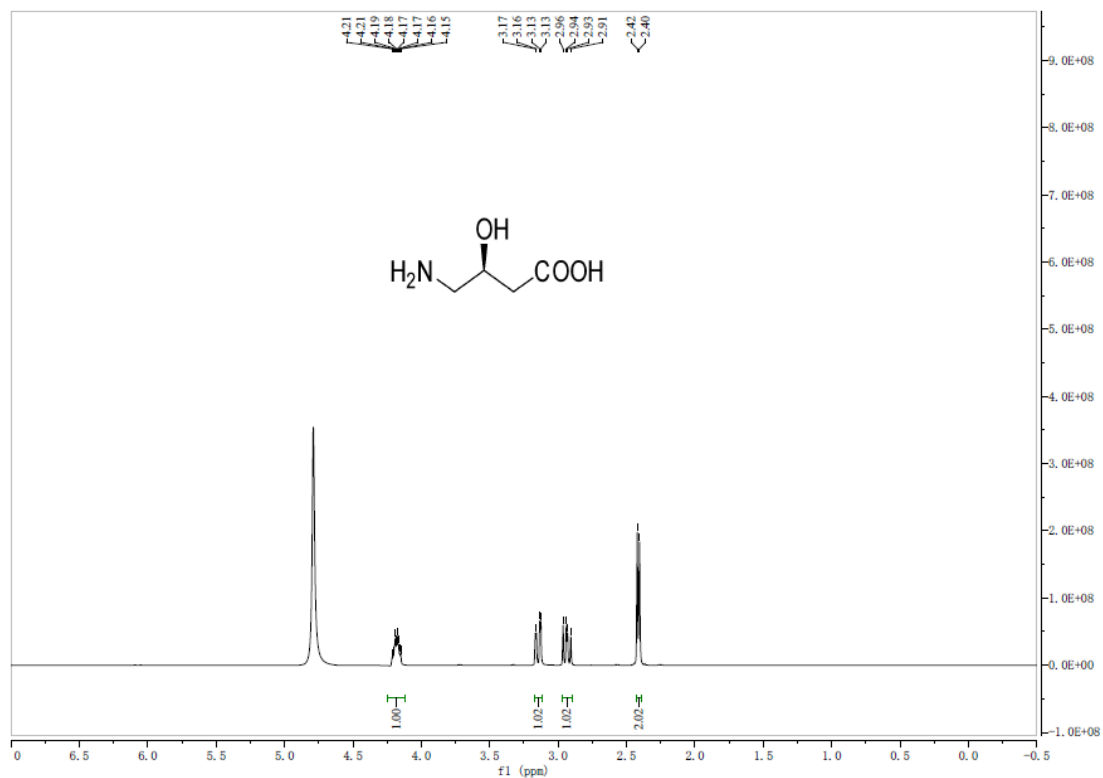



## <sup>13</sup>C NMR

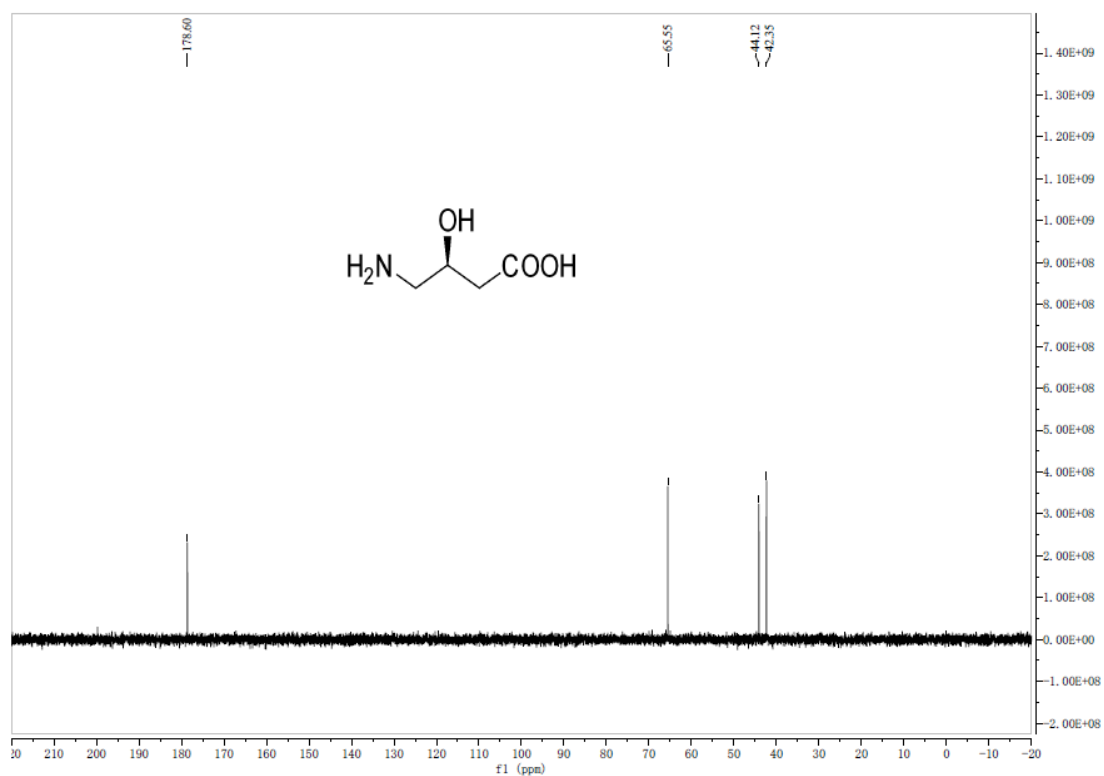

## HRMS

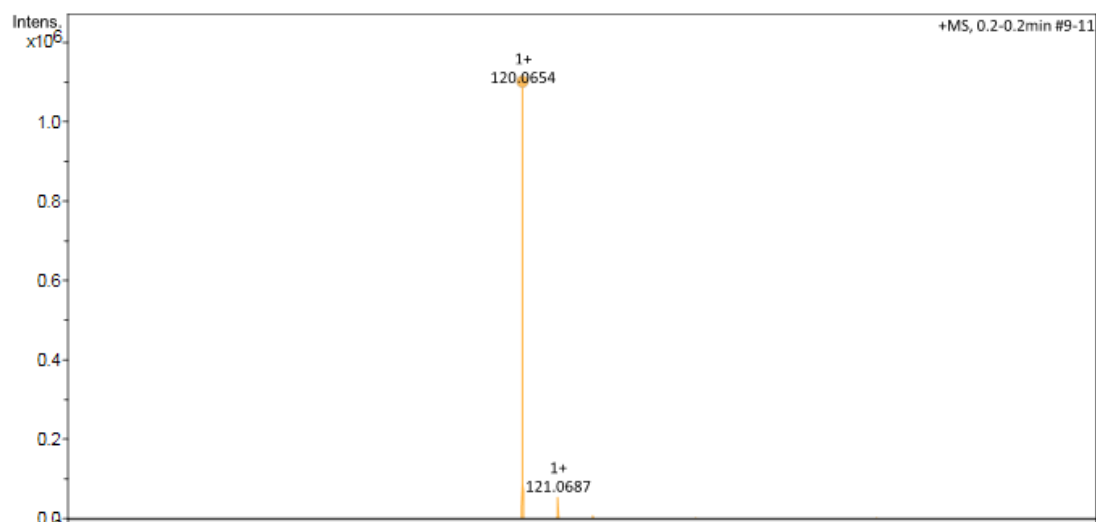

## Chiral HPLC:

### (1S,6R)-6-(Methoxycarbonyl)cyclohex-3-enecarboxylic acid (9a)

Chiral HPLC (Chiralcel OD-H column), Hexane/*i*-PrOH = 93/7, Flow rate: 0.5 mL/min, UV detection at 220 nm, T = 30°C, retention time: t(major) = 33.1 min, t(minor) = 45.3 min.

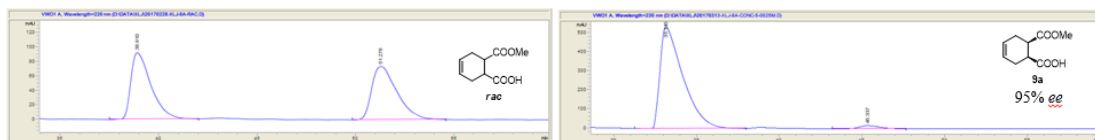

| Entry | Time   | Peak area | Peak height | Peak width | Symmetric factor | Peak area% |
|-------|--------|-----------|-------------|------------|------------------|------------|
| 1     | 38.91  | 6532.5    | 92.2        | 1.0816     | 0.441            | 49.899     |
| 2     | 51.278 | 6558.9    | 73.7        | 1.3092     | 0.523            | 50.101     |

| Entry | Time   | Peak area | Peak height | Peak width | Symmetric factor | Peak area% |
|-------|--------|-----------|-------------|------------|------------------|------------|
| 1     | 33.145 | 51055.2   | 533.2       | 1.4091     | 0.326            | 97.239     |
| 2     | 45.337 | 1449.7    | 16.8        | 1.3058     | 0.691            | 2.761      |

### (1*S*,2*R*)-2-(Methoxycarbonyl)cyclohexanecarboxylic acid (**9b**)

Chiral HPLC (Chiralcel AD-H column), Hexane/*i*-PrOH = 93/7, Flow rate: 0.5 mL/min, UV detection at 220 nm, T = 30°C, retention time: t(minor) = 23.2 min, t(major) = 29.9 min.

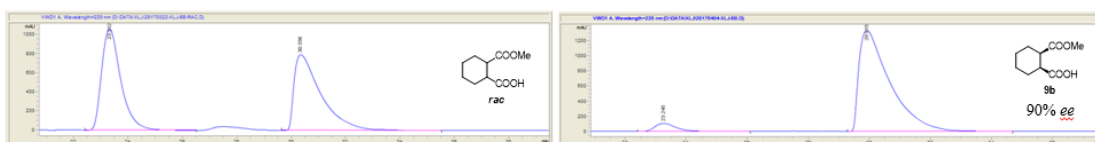

| Entry | Time   | Peak area | Peak height | Peak width | Symmetric factor | Peak area% |
|-------|--------|-----------|-------------|------------|------------------|------------|
| 1     | 23.312 | 52213.9   | 1065.4      | 0.7538     | 0.651            | 48.956     |
| 2     | 30.336 | 54440.7   | 793.9       | 1.009      | 0.302            | 51.044     |

| Entry | Time   | Peak area | Peak height | Peak width | Symmetric factor | Peak area% |
|-------|--------|-----------|-------------|------------|------------------|------------|
| 1     | 23.245 | 5106.3    | 105.2       | 0.7502     | 0.635            | 5.134      |
| 2     | 29.915 | 94362.4   | 1335.7      | 1.0212     | 0.313            | 94.866     |

### (1*S*,2*R*,3*S*,4*R*)-3-(Methoxycarbonyl)-7-oxabicyclo[2.2.1]hept-5-ene-2-carboxylic acid (**9c**)

Chiral HPLC (Chiralcel OD-H column), Hexane/*i*-PrOH = 85/15, Flow rate: 0.5 mL/min, UV detection at 220 nm, T = 30°C, retention time: t(major) = 23.8 min, t(minor) = 37.8 min.

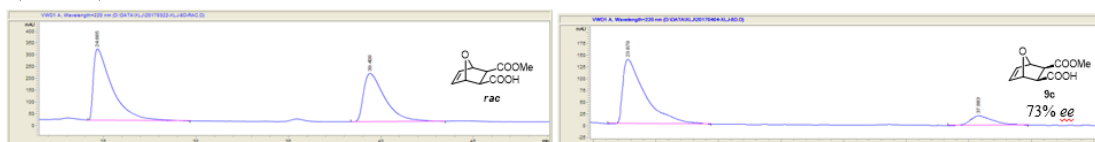

| Entry | Time   | Peak area | Peak height | Peak width | Symmetric factor | Peak area% |
|-------|--------|-----------|-------------|------------|------------------|------------|
| 1     | 24.655 | 21192.5   | 301.3       | 1.0076     | 0.254            | 56.593     |
| 2     | 39.409 | 16254.5   | 203.6       | 1.1914     | 0.401            | 43.407     |

| Entry | Time   | Peak area | Peak height | Peak width | Symmetric factor | Peak area% |
|-------|--------|-----------|-------------|------------|------------------|------------|
| 1     | 23.879 | 8489.2    | 137.3       | 0.8673     | 0.267            | 86.657     |
| 2     | 37.883 | 1307.2    | 20.4        | 0.9131     | 0.565            | 13.343     |

### (1*R*,2*S*,3*R*,4*S*)-3-(Methoxycarbonyl)bicyclo[2.2.1]hept-5-ene-2-carboxylic acid (**9d**)

Chiral HPLC (Chiralcel AD-H column), Hexane/*i*-PrOH = 96/4, Flow rate: 0.5 mL/min, UV detection at 220 nm, T = 30°C, retention time: t(minor) = 47.8 min, t(major) = 50.7 min.

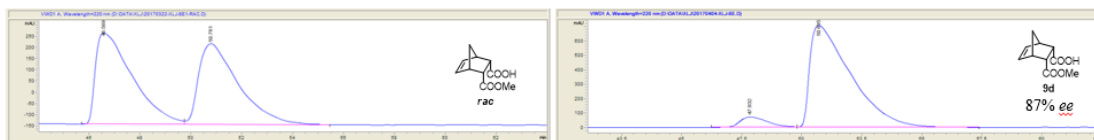

| Entry | Time   | Peak area | Peak height | Peak width | Symmetric factor | Peak area% |
|-------|--------|-----------|-------------|------------|------------------|------------|
| 1     | 46.569 | 40886.6   | 406.5       | 1.4644     | 0.265            | 51.193     |
| 2     | 50.781 | 38981.2   | 360.2       | 1.5524     | 0.416            | 48.807     |

| Entry | Time   | Peak area | Peak height | Peak width | Symmetric factor | Peak area% |
|-------|--------|-----------|-------------|------------|------------------|------------|
| 1     | 47.832 | 5769.2    | 71.4        | 1.275      | 0.545            | 6.456      |
| 2     | 50.695 | 83595.6   | 704.6       | 1.6271     | 0.257            | 93.544     |

### (R)-5-Methoxy-3-methyl-5-oxopentanoic acid (9e)

Chiral HPLC (Chiralcel AD-H column), Hexane/*i*-PrOH = 96/4, Flow rate: 0.5 mL/min, UV detection at 220 nm, T = 30°C, retention time: t(minor) = 38.3 min, t(major) = 44.1 min.

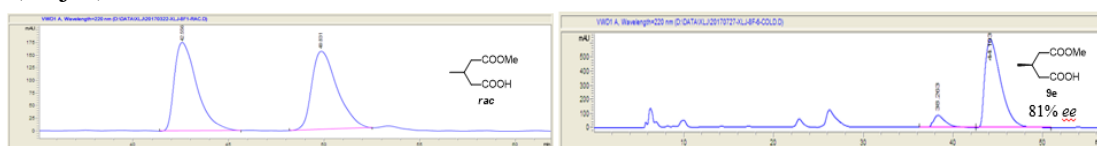

| Entry | Time   | Peak area | Peak height | Peak width | Symmetric factor | Peak area% |
|-------|--------|-----------|-------------|------------|------------------|------------|
| 1     | 42.556 | 14359.8   | 176         | 1.2731     | 0.5              | 49.920     |
| 2     | 49.831 | 14405.7   | 155.6       | 1.3534     | 0.562            | 50.080     |

| Entry | Time   | Peak area | Peak height | Peak width | Symmetric factor | Peak area% |
|-------|--------|-----------|-------------|------------|------------------|------------|
| 1     | 38.263 | 8261.4    | 88.7        | 1.3905     | 0.512            | 9.587      |
| 2     | 44.103 | 77907.3   | 635.3       | 1.8827     | 0.465            | 90.413     |

### (R)-3-Ethyl-5-methoxy-5-oxopentanoic acid (9f)

Chiral HPLC (Chiralcel AD-H column), Hexane/*i*-PrOH = 94/6, Flow rate: 0.5 mL/min, UV detection at 220 nm, T = 30°C, retention time: t(minor) = 26.7 min, t(major) = 30.3 min.

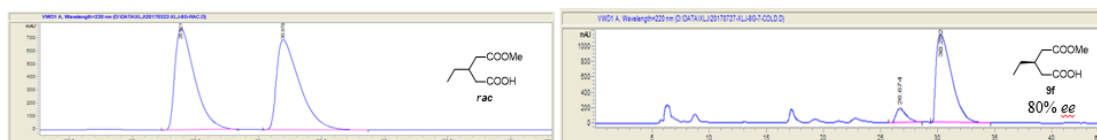

| Entry | Time   | Peak area | Peak height | Peak width | Symmetric factor | Peak area% |
|-------|--------|-----------|-------------|------------|------------------|------------|
| 1     | 26.921 | 42630.3   | 779.7       | 0.8209     | 0.423            | 49.262     |
| 2     | 30.97  | 43908.2   | 692.6       | 0.9216     | 0.372            | 50.738     |

| Entry | Time   | Peak area | Peak height | Peak width | Symmetric factor | Peak area% |
|-------|--------|-----------|-------------|------------|------------------|------------|
| 1     | 26.674 | 11525.9   | 184.9       | 0.9433     | 0.538            | 9.690      |
| 2     | 30.282 | 107424.3  | 1140        | 1.4514     | 0.374            | 90.310     |

### (R)-3-Isopropyl-5-methoxy-5-oxopentanoic acid (9g)

Chiral HPLC (Chiralcel IA-H column), Hexane/*i*-PrOH = 94/6, Flow rate: 0.5 mL/min, UV detection at 220 nm, T = 30°C, retention time: t(minor) = 24.4 min, t(major) = 31.0 min.

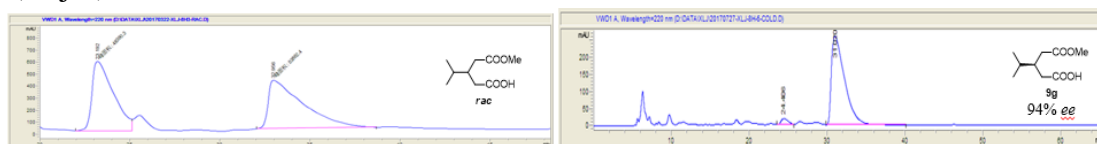

| Entry | Time   | Peak area | Peak height | Peak width | Symmetric factor | Peak area% |
|-------|--------|-----------|-------------|------------|------------------|------------|
| 1     | 23.192 | 48390.3   | 579         | 1.3929     | 0.349            | 47.324     |
| 2     | 32.956 | 53862.4   | 402.2       | 2.2321     | 0.177            | 52.676     |

| Entry | Time   | Peak area | Peak height | Peak width | Symmetric factor | Peak area% |
|-------|--------|-----------|-------------|------------|------------------|------------|
| 1     | 24.406 | 963.8     | 17.1        | 0.8791     | 0.567            | 3.006      |
| 2     | 31.02  | 31101.6   | 263.7       | 1.72       | 0.347            | 96.994     |

### (R)-3-(Allyloxy)-5-methoxy-5-oxopentanoic acid (9h)

Chiral HPLC (Chiralcel AD-H column), Hexane/*i*-PrOH = 95/5, Flow rate: 0.6 mL/min, UV detection at 220 nm, T = 30°C, retention time: t(minor) = 50.4 min, t(major) = 58.8 min.

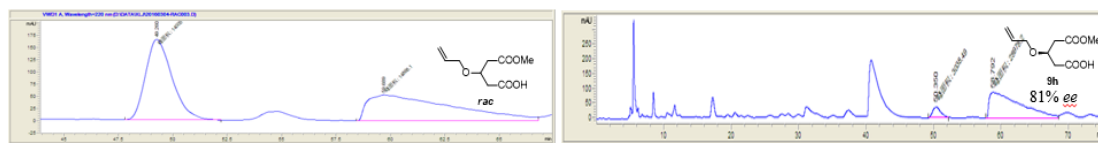

| Entry | Time   | Peak area | Peak height | Peak width | Symmetric factor | Peak area% | Entry | Time   | Peak area | Peak height | Peak width | Symmetric factor | Peak area% |
|-------|--------|-----------|-------------|------------|------------------|------------|-------|--------|-----------|-------------|------------|------------------|------------|
| 1     | 49.26  | 14005     | 165         | 1.4149     | 0.701            | 48.505     | 1     | 50.35  | 3038.5    | 37.2        | 1.3626     | 0.709            | 9.490      |
| 2     | 59.689 | 14868.1   | 53.7        | 4.6156     | 0.23             | 51.495     | 2     | 58.792 | 28978.2   | 88.6        | 5.451      | 0.131            | 90.510     |

### (R)-5-Methoxy-5-oxo-3-phenylpentanoic acid (9i)

Chiral HPLC (Chiralcel AD-H column), Hexane/*i*-PrOH = 90/10, Flow rate: 0.5 mL/min, UV detection at 220 nm, T = 30°C, retention time: t(minor) = 43.2 min, t(major) = 49.2 min.

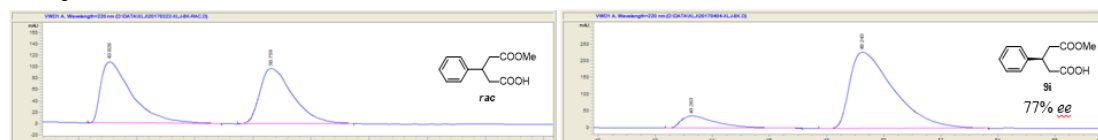

| Entry | Time   | Peak area | Peak height | Peak width | Symmetric factor | Peak area% | Entry | Time   | Peak area | Peak height | Peak width | Symmetric factor | Peak area% |
|-------|--------|-----------|-------------|------------|------------------|------------|-------|--------|-----------|-------------|------------|------------------|------------|
| 1     | 43.826 | 10090.4   | 108.1       | 1.3476     | 0.367            | 51.235     | 1     | 43.263 | 3143.3    | 36.4        | 1.2708     | 0.391            | 11.420     |
| 2     | 50.759 | 9603.9    | 97.6        | 1.4637     | 0.481            | 48.765     | 2     | 49.243 | 24380.3   | 228.7       | 1.6055     | 0.376            | 88.580     |

### (R)-3-(4-Chlorophenyl)-5-methoxy-5-oxopentanoic acid (9j)

Chiral HPLC (Chiralcel OD-H column), Hexane/*i*-PrOH = 92/8, Flow rate: 0.5 mL/min, UV detection at 220 nm, T = 30°C, retention time: t(minor) = 47.7 min, t(major) = 53.3 min.

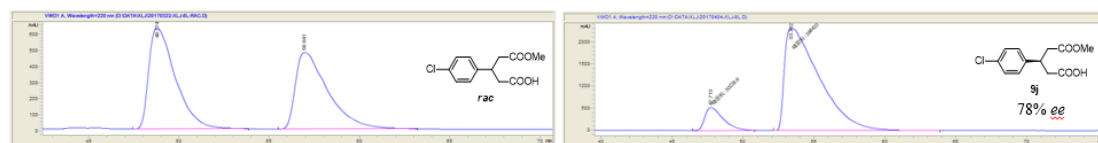

| Entry | Time   | Peak area | Peak height | Peak width | Symmetric factor | Peak area% | Entry | Time   | Peak area | Peak height | Peak width | Symmetric factor | Peak area% |
|-------|--------|-----------|-------------|------------|------------------|------------|-------|--------|-----------|-------------|------------|------------------|------------|
| 1     | 48.774 | 64414.3   | 629         | 1.5588     | 0.419            | 51.982     | 1     | 47.713 | 50226.6   | 535.1       | 1.5644     | 0.474            | 11.195     |
| 2     | 56.941 | 59502.5   | 474.5       | 1.787      | 0.358            | 48.018     | 2     | 53.382 | 398419.8  | 2307.4      | 2.8779     | 0.235            | 88.805     |

### (R)-5-Methoxy-5-oxo-3-(*p*-tolyl)pentanoic acid (9k)

Chiral HPLC (Chiralcel IA-H column), Hexane/*i*-PrOH = 95/5, Flow rate: 1.0 mL/min, UV detection at 220 nm, T = 30°C, retention time: t(minor) = 41.1 min, t(major) = 47.8 min.

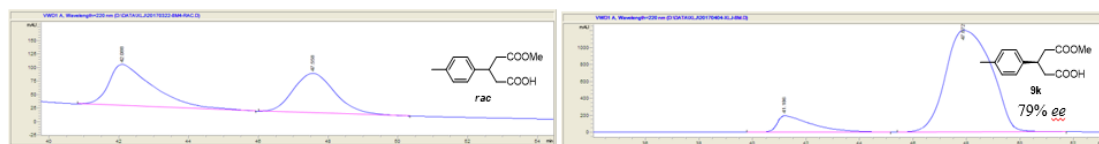

| Entry | Time   | Peak area | Peak height | Peak width | Symmetric factor | Peak area% |
|-------|--------|-----------|-------------|------------|------------------|------------|
| 1     | 42.088 | 6702.8    | 75.9        | 1.2607     | 0.404            | 52.517     |
| 2     | 47.558 | 6060.2    | 72.7        | 1.3091     | 0.832            | 47.483     |

| Entry | Time   | Peak area | Peak height | Peak width | Symmetric factor | Peak area% |
|-------|--------|-----------|-------------|------------|------------------|------------|
| 1     | 41.186 | 17155.6   | 193.4       | 1.2798     | 0.259            | 10.685     |
| 2     | 47.872 | 143428    | 1207.9      | 1.6013     | 0.632            | 89.315     |

### (R)-5-Methoxy-3-(4-methoxyphenyl)-5-oxopentanoic acid (9l)

Chiral HPLC (Chiralcel AD-H column), Hexane/*i*-PrOH = 93/7, Flow rate: 0.6 mL/min, UV detection at 220 nm, T = 30°C, retention time: t(minor) = 87.91 min, t(major) = 103.9 min.

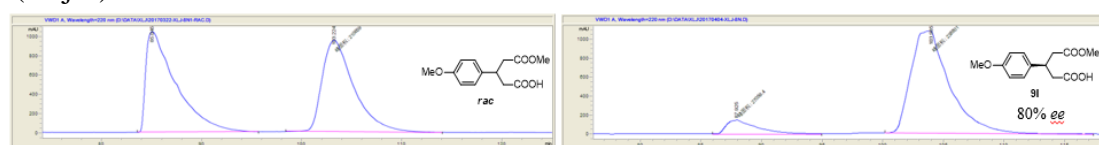

| Entry | Time    | Peak area | Peak height | Peak width | Symmetric factor | Peak area% |
|-------|---------|-----------|-------------|------------|------------------|------------|
| 1     | 85.045  | 215612.3  | 1038.6      | 2.829      | 0.245            | 50.581     |
| 2     | 103.224 | 210659.3  | 946.2       | 3.7107     | 0.577            | 49.419     |

| Entry | Time    | Peak area | Peak height | Peak width | Symmetric factor | Peak area% |
|-------|---------|-----------|-------------|------------|------------------|------------|
| 1     | 87.925  | 27059.4   | 149         | 3.0272     | 0.469            | 10.176     |
| 2     | 103.935 | 238801.3  | 1072.6      | 3.7106     | 0.963            | 89.822     |

### (1S,6R)-6-(Ethoxycarbonyl)cyclohex-3-ene-1-carboxylic acid (9m)

Chiral HPLC (Chiralcel IA-H column), Hexane/*i*-PrOH = 94/6, Flow rate: 0.5 mL/min, UV detection at 220 nm, T = 30°C, retention time: t(minor) = 25.7 min, t(major) = 29.5 min.

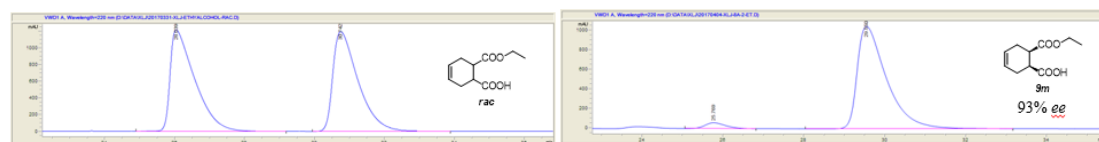

| Entry | Time   | Peak area | Peak height | Peak width | Symmetric factor | Peak area% |
|-------|--------|-----------|-------------|------------|------------------|------------|
| 1     | 26.039 | 59988.7   | 1226.1      | 0.7162     | 0.308            | 49.876     |
| 2     | 30.742 | 60287.5   | 1201.5      | 0.7554     | 0.422            | 50.124     |

| Entry | Time   | Peak area | Peak height | Peak width | Symmetric factor | Peak area% |
|-------|--------|-----------|-------------|------------|------------------|------------|
| 1     | 25.769 | 2073.5    | 59.1        | 0.5384     | 0.693            | 3.776      |
| 2     | 29.55  | 52839.6   | 1047.8      | 0.7543     | 0.425            | 96.224     |

### (1S,6R)-6-(Isopropoxycarbonyl)cyclohex-3-ene-1-carboxylic acid (9n)

Chiral HPLC (Chiralcel IA-H column), Hexane/*i*-PrOH = 94/6, Flow rate: 0.5 mL/min, UV detection at 220 nm, T = 30°C, retention time: t(minor) = 30.4 min, t(major) = 36.1 min.

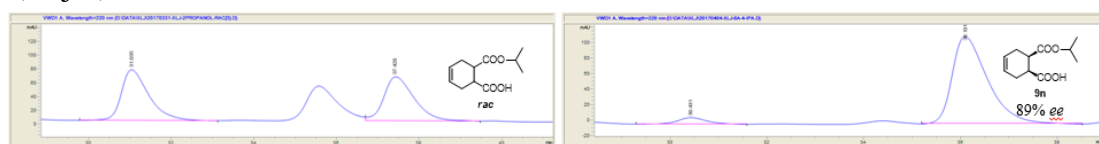

| Entry | Time   | Peak area | Peak height | Peak width | Symmetric factor | Peak area% |
|-------|--------|-----------|-------------|------------|------------------|------------|
| 1     | 31.035 | 3401.2    | 73.5        | 0.6956     | 0.569            | 50.842     |
| 2     | 37.42  | 3288.6    | 64.2        | 0.7824     | 0.622            | 49.158     |

| Entry | Time   | Peak area | Peak height | Peak width | Symmetric factor | Peak area% |
|-------|--------|-----------|-------------|------------|------------------|------------|
| 1     | 30.431 | 351.5     | 8.4         | 0.6174     | 0.826            | 5.766      |
| 2     | 36.101 | 5744.2    | 112.6       | 0.7721     | 0.538            | 94.234     |

### (1*S*,6*R*)-6-((Allyloxy)carbonyl)cyclohex-3-enecarboxylic acid (**9o**)

Chiral HPLC (Chiralcel IA-H column), Hexane/*i*-PrOH = 94/6, Flow rate: 0.5 mL/min, UV detection at 220 nm, T = 30°C, retention time: t(minor) = 30.3 min, t(major) = 36.2 min.

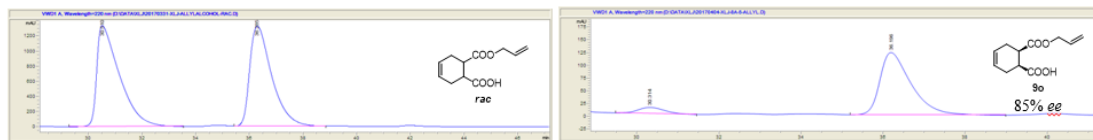

| Entry | Time   | Peak area | Peak height | Peak width | Symmetric factor | Peak area% | Entry | Time   | Peak area | Peak height | Peak width | Symmetric factor | Peak area% |
|-------|--------|-----------|-------------|------------|------------------|------------|-------|--------|-----------|-------------|------------|------------------|------------|
| 1     | 30.51  | 78338.6   | 1336.4      | 0.8559     | 0.3              | 50.991     | 1     | 30.314 | 539.9     | 12          | 0.7029     | 0.779            | 7.709      |
| 2     | 36.285 | 75294.9   | 1321.7      | 0.8626     | 0.495            | 49.009     | 2     | 36.196 | 6463.7    | 122.7       | 0.7786     | 0.52             | 92.291     |

### (1*S*,6*R*)-6-((Benzyloxy)carbonyl)cyclohex-3-enecarboxylic acid (**9p**)

Chiral HPLC (Chiralcel AD-H column), Hexane/*i*-PrOH = 95/5, Flow rate: 0.2 mL/min, UV detection at 210 nm, T = 30°C, retention time: t(major) = 69.6 min, t(minor) = 75.6 min.

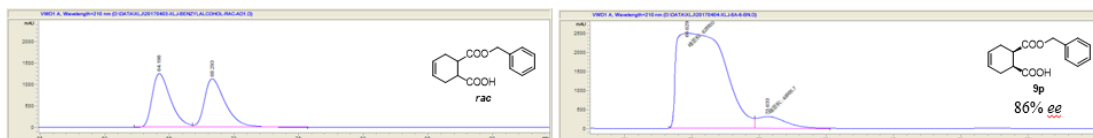

| Entry | Time   | Peak area | Peak height | Peak width | Symmetric factor | Peak area% | Entry | Time   | Peak area | Peak height | Peak width | Symmetric factor | Peak area% |
|-------|--------|-----------|-------------|------------|------------------|------------|-------|--------|-----------|-------------|------------|------------------|------------|
| 1     | 64.198 | 124487.3  | 1252.9      | 1.4882     | 0.588            | 49.338     | 1     | 69.629 | 628799.9  | 2495.1      | 4.2003     | 0.277            | 92.693     |
| 2     | 68.293 | 127826.7  | 1132.9      | 1.5914     | 0.549            | 50.662     | 2     | 75.633 | 49565.7   | 316.5       | 2.6102     | 0.492            | 7.307      |

### (1*S*,6*R*)-6-((Cinnamyloxy)carbonyl)cyclohex-3-enecarboxylic acid (**9q**)

Chiral HPLC (Chiralcel AD-H column), Hexane/*i*-PrOH = 94/6, Flow rate: 0.5 mL/min, UV detection at 254 nm, T = 30°C, retention time: t(minor) = 31.1 min, t(major) = 34.6 min.

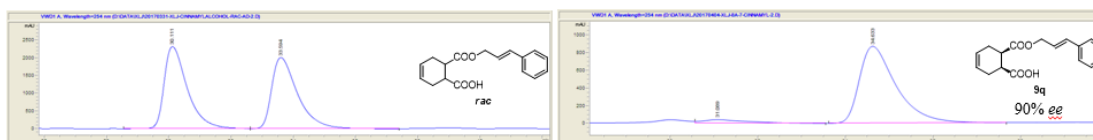

| Entry | Time   | Peak area | Peak height | Peak width | Symmetric factor | Peak area% | Entry | Time   | Peak area | Peak height | Peak width | Symmetric factor | Peak area% |
|-------|--------|-----------|-------------|------------|------------------|------------|-------|--------|-----------|-------------|------------|------------------|------------|
| 1     | 30.111 | 119187.9  | 2309        | 0.7802     | 0.52             | 50.760     | 1     | 31.089 | 2662.8    | 38.1        | 0.9612     | 0.463            | 5.026      |
| 2     | 33.594 | 115617.1  | 2001.5      | 0.8709     | 0.511            | 49.240     | 2     | 34.633 | 50316.5   | 865         | 0.8716     | 0.53             | 94.974     |
